# Supplementary material for: Biochemical Analysis to Understand the Flooding Tolerance of Mutant Soybean Irradiated with Gamma Rays
Source: MDPI journal article supplement (doi:10.3390/ijms25010517), 2023-12-30
Supplement: s1 [file s1]

Supplemental Table S5. List of primers used for polymerase-chain reaction analysis in this research.

| Name of gene                             | Accession | F                     | R                    |
|------------------------------------------|-----------|-----------------------|----------------------|
| <i>18S rRNA</i>                          |           | TGATTAAACAGGGACAGTCGG | ACGGTATCTGATCGTCTTCG |
| <i>60S ribosomal protein L12-3</i>       | C6TMB5    | ACTCCTTCTTCTCCGCTTCC  | GTCCTTGGGATCCTTTCCAT |
| <i>RNase H domain-containing protein</i> | C6T2R5    | TTAAGCCCAATCACCTGAC   | TTCCCAGAAGATCGACAACC |
