# Supplementary material for: Biochemical Analysis to Understand the Flooding Tolerance of Mutant Soybean Irradiated with Gamma Rays
Source: Int J Mol Sci. 2023 Dec 30;25(1):517. doi: 10.3390/ijms25010517 (PMC10779331; doi:10.3390/ijms25010517)
Supplement: Supplementary file 1 [file ijms-25-00517-s001.zip]

Archive with 4 entries (4 files):
- Additional Figure for Figure 4 (genomic DNA).jpg
- Supplemental Figures.pdf
- Supplemental Table S5.pdf
- Supplemental Tables S1-S4.xlsx
