# Supplementary material for: Biochemical Analysis to Understand the Flooding Tolerance of Mutant Soybean Irradiated with Gamma Rays
Source: Int J Mol Sci. 2023 Dec 30;25(1):517. doi: 10.3390/ijms25010517 (PMC10779331; doi:10.3390/ijms25010517)
Supplement: Supplementary file 1 [file ijms-25-00517-s001.zip › Supplemental Tables S1-S4.xlsx]

## Sheet: Supplemental Table S1
Supplemental Table 1. List of changed proteins in mutant line compared with wild type soybean under non-flooding condition.
Significant	#NAME?	p-value	Difference	Accession	Protein names	Coverage in Percent	Number of Peptides	MW in kDa	calc pI	TAIR ID	Bin codes	MapMan function
	2.89587	0.00127096	6.20556	C6TMB5	Uncharacterized protein	45	5	17.8	8.97	at2g37190	29.2.1.2.2.12	protein.synthesis.ribosomal protein.eukaryotic.60S subunit.L12
	3.7775	0.000166916	5.88482	C6T9K9	Elongation factor Tu	49	17	49.8	7.05	at4g02930	29.2.4	protein.synthesis.elongation
	2.83103	0.00147562	5.69339	I1KMK2	Uncharacterized protein	4	3	162.5	8.13	at3g53480	34.16	transport.ABC transporters and multidrug resistance systems
	3.23007	0.000588755	4.76503	I1KZW3	Uncharacterized protein	32	6	32.8	5.92	at4g04210	29.5	protein.degradation
	2.37674	0.00420015	4.55821	I1MV69	Uncharacterized protein	25	4	27.5	9.2	at4g17030	10.7	cell wall.modification
	2.46832	0.00340157	4.34712	I1KBD1	Protein kinase domain-containing protein	4	2	129.2	6.74	at4g39400	17.3.2.1	hormone metabolism.brassinosteroid.signal transduction.BRI
	3.18765	0.000649159	4.16815	C6SYA5	60S ribosomal protein L18a	29	4	21.3	10.42	at2g34480	29.2.1.2.2.518	protein.synthesis.ribosomal protein.eukaryotic.60S subunit.L18A
	2.75877	0.00174273	3.65149	A0A0R4J4G7	Uncharacterized protein	15	2	29.4	6.79	at1g52340	17.1.1.1.11	hormone metabolism.abscisic acid.synthesis-degradation.synthesis.short chain alcohol dehydrogenmase (ABA2)
	2.43211	0.00369732	3.44783	I1LVI3	Uncharacterized protein	12	9	100.1	9.07	at1g59610	26.17	misc.dynamin
	3.45376	0.000351753	3.3423	A0A0R0GL62	PRA1 family protein	22	2	23.1	9.82	at2g38360	31.4	cell.vesicle transport
	1.89975	0.0125965	3.33836	I1KQE2	Uncharacterized protein	59	9	34.6	7.81	at3g20000	29.3.2	protein.targeting.mitochondria
	1.3922	0.0405325	3.03667	A0A0R0I304	Uncharacterized protein	8	2	57.6	8.94	at1g05160	17.6.1.4	hormone metabolism.gibberelin.synthesis-degradation.ent-kaurenoic acid hydroxylase/oxygenase
	1.54496	0.0285126	2.90243	I1JJ62	Citrate synthase (EC 2.3.3.16)	19	5	56.5	8.72	at2g42790	6.1	gluconeogenese/ glyoxylate cycle.citrate synthase
	1.71421	0.0193105	2.80698	C6TMH1	ZnMc domain-containing protein	12	2	40.1	5.63	at1g59970	29.5.7	protein.degradation.metalloprotease
	1.90215	0.0125271	2.7239	I1NCN7	Uncharacterized protein	5	3	115.7	6.46	at1g01220	10.1.1.2	cell wall.precursor synthesis.NDP sugar pyrophosphorylase.GDP fucose and fucokinase
	2.42233	0.00378157	2.70033	C6TKW5	MHD domain-containing protein	7	2	49.7	7.18	at4g24550	29.3.4.99	protein.targeting.secretory pathway.unspecified
	1.47587	0.0334294	2.63516	I1KJ00	Uncharacterized protein	14	3	28.2	5.43	at1g18390	30.2.20	signalling.receptor kinases.wheat LRK10 like
	3.33304	0.000464475	2.4269	A0A0R0KF48	Uncharacterized protein	41	14	65.2	6.21	at5g01320	5.2	fermentation.PDC
	2.91459	0.00121733	2.37458	Q1WCP1	Cytochrome P450 monooxygenase CYP94D24 (Fragment)	6	2	39.3	9.22	at3g56630	26.1	misc.cytochrome P450
	1.41134	0.0387851	2.34742	I1LRQ2	NEDD8-activating enzyme E1 regulatory subunit	21	5	57.9	5.24	at1g05180	17.2.2	hormone metabolism.auxin.signal transduction
	1.5096	0.0309316	2.30343	I1KLU0	Mitogen-activated protein kinase (EC 2.7.11.24)	27	7	49.9	5.96	at2g43790	30.6	signalling.MAP kinases
	1.57705	0.0264821	2.30081	K7KRK2	Uncharacterized protein	17	3	31.5	6.44	at1g07210	29.2.1.1.3.1.18	protein.synthesis.ribosomal protein.prokaryotic.unknown organellar.30S subunit.S18
	2.74313	0.00180664	2.27602	I1NGM0	Uncharacterized protein	5	2	75.1	9.01	at5g62190	27.1.2	RNA.processing.RNA helicase
	1.43308	0.0368909	2.25903	I1LMC1	RRM domain-containing protein	10	2	31.7	11.41	at5g37720	27.4	RNA.RNA binding
	1.74982	0.0177901	2.06033	C6T721	Aldose 1-epimerase (EC 5.1.3.3) (Galactose mutarotase)	13	3	40.6	9.28	at5g15140	3.5	minor CHO metabolism.others
	3.15658	0.000697307	1.9815	I1L7R7	CTP synthase (EC 6.3.4.2) (UTP--ammonia ligase)	9	3	61.6	6.05	at4g02120	23.1.1.10	nucleotide metabolism.synthesis.pyrimidine.CTP synthetase
	1.9738	0.0106219	1.95525	K7KU37	Uncharacterized protein	2	2	147.2	5.94	at1g27595	33.99	development.unspecified
	1.76446	0.0172006	1.8579	I1LWX5	Uncharacterized protein	21	6	54.2	7.42	at1g19920	14.1	S-assimilation.APS
	1.91858	0.0120619	1.79705	I1JET8	Uncharacterized protein	6	2	56.9	6.48	at3g19280	29.7.10	protein.glycosylation.alpha-1,3-fucosyltransferase(alpha-1,3-FucT)
	2.3118	0.00487751	1.77641	K7LF33	RBR-type E3 ubiquitin transferase (EC 2.3.2.31)	10	3	68.2	5.26	at1g32340	29.5.11.4.2	protein.degradation.ubiquitin.E3.RING
	3.19049	0.000644922	1.74659	I1MRW2	Importin N-terminal domain-containing protein	5	4	123.7	4.83	at3g17340	29.3.1	protein.targeting.nucleus
	1.30806	0.049197	1.68525	C6TIP6	Uncharacterized protein	10	3	54.5	8.25	at2g18190	29.5.9	protein.degradation.AAA type
	1.87994	0.0131843	1.63473	K7LSJ2	Importin N-terminal domain-containing protein	24	17	123.9	5.57	at5g17020	29.3.1	protein.targeting.nucleus
	2.2588	0.00551063	1.42236	A0A0R0EP22	Uncharacterized protein	14	6	76.5	7.87	at3g01680	35.2	not assigned.unknown
	1.5883	0.0258049	1.37709	I1NB50	Uncharacterized protein	7	2	52.8	7.9	at3g62720	26.2	misc.UDP glucosyl and glucoronyl transferases
	3.53978	0.000288548	1.33628	I1N3Y0	Uncharacterized protein	15	4	46.1	7.05	at1g65320	35.1	not assigned.no ontology
	3.08648	0.00081945	1.20353	A0A0R0KFE8	Chlorophyll a-b binding protein, chloroplastic	27	5	31.4	6.32	at3g08940	1.1.1.1	PS.lightreaction.photosystem II.LHC-II
	1.4485	0.0356041	1.19343	I1LM96	60S ribosomal export protein NMD3	8	3	58.5	6.73	at2g03820	35.1	not assigned.no ontology
	1.56863	0.0270004	1.16871	A0A0R0IH39	Uncharacterized protein	2	2	212.1	7.31	at1g24706	35.2	not assigned.unknown
	1.60159	0.0250272	1.1259	A0A0R0EM40	Uncharacterized protein	8	3	57.1	8.63	at5g06900	26.1	misc.cytochrome P450
	1.86334	0.0136982	1.11525	K7MFQ7	Uncharacterized protein	15	6	68.8	8.5	at1g31850	20.2.3	stress.abiotic.drought/salt
	1.39871	0.0399296	1.10913	I1LJG3	Flavodoxin-like domain-containing protein	25	4	27.3	6	at4g36750	11.8	lipid metabolism.''exotics'' (steroids, squalene etc)
	3.45281	0.000352523	1.09948	K7MNN1	Aminotran_1_2 domain-containing protein	12	3	52.8	7.94	at4g36480	11.8.1	lipid metabolism.''exotics'' (steroids, squalene etc).sphingolipids
	2.28427	0.00519673	1.0771	I1K072	Uncharacterized protein	33	16	77.3	5.14	at5g63190	28.99	DNA.unspecified
	1.63228	0.0233198	1.07012	I1NAS0	EF-hand domain-containing protein	9	3	47.3	5.49	at5g06260	28.1	DNA.synthesis/chromatin structure
	1.37925	0.041759	1.06618	I1K6B1	NAB domain-containing protein	5	4	139.4	4.94	at5g41790	30.11.1	signalling.light.COP9 signalosome
	1.48033	0.0330877	1.04908	K7M034	BED-type domain-containing protein	8	6	122.7	5	at3g42170	28.99	DNA.unspecified
	1.3052	0.0495223	1.04327	A0A0R0JDS4	TP_methylase domain-containing protein	24	2	30.8	5.39	at4g31790	26.6	misc.O-methyl transferases
	1.76135	0.0173242	0.992338	C6T065	Ribosomal_S17_N domain-containing protein	31	4	17.8	10.56	at5g23740	29.2.1.2.1.11	protein.synthesis.ribosomal protein.eukaryotic.40S subunit.S11
	1.58182	0.0261924	0.980098	I1L0D9	Peroxidase (EC 1.11.1.7)	36	6	38	7.3	at2g38380	26.12	misc.peroxidases
	2.01333	0.00969767	0.969902	I1JK97	Protein kinase domain-containing protein	19	6	55.1	5.99	at4g00710	29.4	protein.postranslational modification
	2.91951	0.00120361	0.910803	I1MY43	Vacuolar protein sorting-associated protein 35	15	7	90.3	5.43	at1g75850	29.3.4.3	protein.targeting.secretory pathway.vacuole
	2.25085	0.00561246	0.891379	A0A0R0FN05	Gamma-tubulin complex component	7	3	75.3	7.11	at5g17410	31.1	cell.organisation
	2.80575	0.00156406	0.869677	A0A0R0F5Y7	WD_REPEATS_REGION domain-containing protein	18	14	121.9	5.52	at3g13300	27.1	RNA.processing
	1.97307	0.0106398	0.857034	K7LD67	Uncharacterized protein	67	18	41.7	5.49	at3g53750	31.1	cell.organisation
	1.37273	0.0423909	0.854737	C6TFJ4	Uncharacterized protein	38	3	15.3	8.13	at2g28900	29.3.2	protein.targeting.mitochondria
	2.30263	0.0049816	0.826873	Q39834	Clathrin heavy chain	45	55	193.2	5.55	at3g11130	31.4	cell.vesicle transport
	1.33108	0.0466575	0.822979	I1KSA4	Uncharacterized protein	24	2	19.4	5.67	at1g55265	35.2	not assigned.unknown
	1.33287	0.0464656	0.803085	K7LXR3	Uncharacterized protein	6	2	83.1	6.95	at5g15870	20.1	stress.biotic
	2.15222	0.00704339	0.80245	K7MFC0	GYF domain-containing protein	5	7	179.2	6.23	at1g27430	35.1	not assigned.no ontology
	1.33635	0.0460951	0.79726	I1KY70	Uncharacterized protein	5	2	86	6.02	at1g11660	20.2.1	stress.abiotic.heat
	2.89221	0.00128171	0.757716	I1M7P3	Uncharacterized protein	34	2	14.7	4.93	at4g14270	35.2	not assigned.unknown
	2.22713	0.00592746	0.74971	K7LK00	Uncharacterized protein	4	2	83.4	6.04	at5g23490	35.2	not assigned.unknown
	1.52104	0.030127	0.737149	I1N1M0	ATP-dependent 6-phosphofructokinase (ATP-PFK) (Phosphofructokinase) (EC 2.7.1.11) (Phosphohexokinase)	13	4	58.4	7.59	at2g22480	4.2.5	glycolysis.plastid branch.phosphofructokinase (PFK)
	1.41675	0.0383044	0.735061	I1LPZ3	V-type proton ATPase subunit a	27	15	92.9	5.96	at4g39080	34.1	transport.p- and v-ATPases
	2.6781	0.00209846	0.723373	I1J547	Aminotran_1_2 domain-containing protein	35	11	53.5	5.69	at1g70580	1.2.3	PS.photorespiration.aminotransferases peroxisomal
	1.72335	0.0189083	0.713551	I1LQR8	Uncharacterized protein	34	5	26.2	7.85	at2g28790	20.2	stress.abiotic
	3.12729	0.000745956	0.704036	I1K108	Uncharacterized protein	52	18	69.1	7.93	at4g18030	20.2.3	stress.abiotic.drought/salt
	3.15139	0.000705687	0.69863	I1LGI3	RanBD1 domain-containing protein	8	2	39.1	7.18	at4g11790	35.1	not assigned.no ontology
	1.89078	0.0128593	0.690642	I1LLG6	Uncharacterized protein	5	4	179.7	6.14	at5g13530	29.4	protein.postranslational modification
	1.91482	0.0121668	0.65717	C6T3E5	MPN domain-containing protein	39	4	22.9	5.78	at5g55940	35.2	not assigned.unknown
	1.57945	0.0263362	0.648901	K7L9D8	Kinesin motor domain-containing protein	2	2	143.1	6.16	at5g10470	31.1	cell.organisation
	1.68532	0.0206388	0.637514	I1L090	Endoglucanase (EC 3.2.1.4)	13	6	68.3	8.68	at5g49720	10.2	cell wall.cellulose synthesis
	2.10697	0.00781685	0.635259	I1JMK6	Uncharacterized protein	16	3	52.2	5.81	at4g01070	16.8.3	secondary metabolism.flavonoids.dihydroflavonols
	1.60994	0.0245507	0.630449	I1LF85	RING-type domain-containing protein	14	2	31.8	4.75	at3g19950	29.5.11.4.2	protein.degradation.ubiquitin.E3.RING
	1.36887	0.042769	0.61879	I1JMY9	Uncharacterized protein	20	5	48.9	6.3	at3g56900	35.1	not assigned.no ontology
	1.47117	0.0337934	0.612461	C5NTE6	Uncharacterized protein	52	8	34.1	8.66	at3g20000	29.3.2	protein.targeting.mitochondria
	1.62261	0.0238446	0.593425	I1MVM6	Protein kinase domain-containing protein	20	5	40.6	8.66	at2g23070	29.4	protein.postranslational modification
	2.4602	0.00346579	0.586272	I1LL06	Carboxypeptidase (EC 3.4.16.-)	17	5	54.6	6.76	at3g45010	29.5	protein.degradation
	1.39231	0.0405218	-0.595752	I1MXD1	Uncharacterized protein	25	12	69.1	5.88	at2g25970	27.4	RNA.RNA binding
	2.04314	0.00905431	-0.601485	C6T374	VOC domain-containing protein	61	4	15.4	5.69	at1g07645	24.2	Biodegradation of Xenobiotics.lactoylglutathione lyase
	2.52572	0.00298044	-0.602961	I1N8M4	NAC-A/B domain-containing protein	45	6	22	4.55	at3g12390	29.2.4	protein.synthesis.elongation
	2.67437	0.00211658	-0.606849	I1NDE9	Uncharacterized protein	24	8	54.4	4.73	at5g37340	27.3.99	RNA.regulation of transcription.unclassified
	2.65061	0.0022356	-0.615133	C6SX29	ACT domain-containing protein	22	2	16.6	4.7	at2g40435	35.2	not assigned.unknown
	1.46874	0.0339828	-0.615975	I1KB60	Uncharacterized protein	10	2	60	5.22	at5g05180	35.2	not assigned.unknown
	1.37598	0.0420743	-0.648929	I1LD65	Dihydrolipoamide acetyltransferase component of pyruvate dehydrogenase complex (EC 2.3.1.-)	34	9	48.9	8.82	at1g34430	8.1.1.2	TCA / org. transformation.TCA.pyruvate DH.E2
	1.45967	0.0346998	-0.657099	Q43468	Hsp70-Hsp90 organizing protein 1 (GmHop-1) (Heat shock protein STI) (GmSTI) (Stress-inducible protein)	17	7	64.1	5.69	at1g62740	20	stress
	1.32914	0.0468666	-0.676857	K7MVZ6	Glucose-6-phosphate isomerase (EC 5.3.1.9)	37	10	62.7	5.72	at5g42740	4.1.4	glycolysis.cytosolic branch.glucose-6-phosphate isomerase
	1.57112	0.026846	-0.678309	A0A0R0L3G5	Amino_oxidase domain-containing protein	5	3	66.8	7.87	at1g06820	16.1.4	secondary metabolism.isoprenoids.carotenoids
	2.30121	0.00499797	-0.687044	C6T394	UBIQUITIN_CONJUGAT_2 domain-containing protein	11	2	17.9	5.07	at1g23260	29.5.11.3	protein.degradation.ubiquitin.E2
	2.91335	0.00122081	-0.688696	I1JXR7	Exostosin domain-containing protein	12	3	47.1	6.65	at5g61840	26.2	misc.UDP glucosyl and glucoronyl transferases
	1.34928	0.0447425	-0.696132	K7KCU6	Protein kinase domain-containing protein	6	3	92	8.16	at3g51740	17.3.2.1	hormone metabolism.brassinosteroid.signal transduction.BRI
	1.8019	0.0157799	-0.722538	I1K1I6	Isocitrate dehydrogenase [NADP] (EC 1.1.1.42)	30	13	53.3	8.12	at5g14590	8.1.4	TCA / org. transformation.TCA.IDH
	1.85533	0.0139532	-0.730643	C6SWA6	Histone H2A	46	4	15.7	10.67	at5g02560	28.1.3	DNA.synthesis/chromatin structure.histone
	2.15869	0.00693919	-0.733186	C6SV65	Histone H2A	44	3	14.7	10.36	at1g54690	28.1.3	DNA.synthesis/chromatin structure.histone
	1.89721	0.0126705	-0.761499	I1K042	Uncharacterized protein	6	2	66.5	9.95	at1g55150	17.5.3	hormone metabolism.ethylene.induced-regulated-responsive-activated
	2.09524	0.00803083	-0.790507	A0A0R0EWR2	PCI domain-containing protein	12	4	52.9	6.76	at2g26990	30.11.1	signalling.light.COP9 signalosome
	1.37828	0.0418528	-0.793284	Q8RVH5	Basic 7S globulin 2 (SBg7S) (Bg) [Cleaved into: Basic 7S globulin 2 high kDa subunit;Basic 7S globulin 2 low kDa subunit]	40	8	47.2	8.25	at1g03220	29.5.4	protein.degradation.aspartate protease
	1.52653	0.0297486	-0.835121	M1FIS9	Ribosomal protein S4	11	3	41.3	11.22	atmg00290	29.2.1.1.2.1.4	protein.synthesis.ribosomal protein.prokaryotic.mitochondrion.30S subunit.S4
	1.56701	0.0271015	-0.84257	K7LDT9	Uncharacterized protein	9	5	103.3	6.76	at5g52300	20.2.2	stress.abiotic.cold
	2.10915	0.00777772	-0.900999	C6SXR9	Uncharacterized protein	15	3	26.1	8.05	at3g08740	29.2.4	protein.synthesis.elongation
	1.94819	0.011267	-0.903886	I1KYS8	Uncharacterized protein	12	3	41.1	7.85	at3g20920	35.1	not assigned.no ontology
	1.65185	0.0222921	-0.933556	C6TN86	Uncharacterized protein	10	2	38.3	6	at5g40510	35.2	not assigned.unknown
	2.22193	0.00599891	-0.946956	I1JN48	DNA gyrase subunit B (EC 5.6.2.3)	7	3	81.1	8.38	at5g04130	28.1	DNA.synthesis/chromatin structure
	1.36546	0.0431057	-0.973883	I1LRK0	DUF1279 domain-containing protein	15	2	20.4	9.41	at2g27290	35.2	not assigned.unknown
	2.98871	0.00102633	-1.02278	I1MDY6	Uncharacterized protein	5	2	60.6	9.51	at5g64290	34.9	transport.metabolite transporters at the mitochondrial membrane
	2.12112	0.00756622	-1.02838	I1KKH2	Importin N-terminal domain-containing protein	6	3	114.8	5.68	at3g08960	34	transport
	1.51243	0.0307304	-1.19387	C6TE68	Uncharacterized protein	11	2	26.5	7.2	at2g29420	26.9	misc.glutathione S transferases
	1.94156	0.0114405	-1.19468	A6BM07	Isoflavone 7-O-glucosyltransferase 1 (EC 2.4.1.170) (UDP-glucose:isoflavone 7-O-glucosyltransferase)	11	3	52	5.34	at3g16520	26.2	misc.UDP glucosyl and glucoronyl transferases
	1.63971	0.0229241	-1.21516	I1N1G8	PKS_ER domain-containing protein	14	4	41.9	8.94	at1g23740	26.7	misc.oxidases - copper, flavone etc.
	2.42824	0.00373041	-1.35842	A0A0R0KL81	Uncharacterized protein	7	3	80.9	7.14	at5g53180	27.1	RNA.processing
	1.98058	0.0104573	-1.40205	A0A0R0G7V6	Uncharacterized protein	5	2	62.8	6.99	at4g21760	26.3	misc.gluco-, galacto- and mannosidases
	1.98263	0.0104082	-1.55957	I1LZW4	Tr-type G domain-containing protein	16	11	109.9	5.24	at1g06220	29.2.4	protein.synthesis.elongation
	1.37546	0.042125	-1.58252	K7M549	APC1_C domain-containing protein	3	2	201.2	6.27	at5g05560	29.5.11.4.4	protein.degradation.ubiquitin.E3.APC
	2.99926	0.00100171	-1.60232	I1JSX4	AAA domain-containing protein	18	8	74.1	6.19	at5g42270	29.5.7	protein.degradation.metalloprotease
	1.94223	0.0114227	-1.64118	I1L8V8	Uncharacterized protein	45	5	17.7	8.7	at2g37190	29.2.1.2.2.12	protein.synthesis.ribosomal protein.eukaryotic.60S subunit.L12
	2.31801	0.00480832	-1.75987	A0A0R0HAG1	Uncharacterized protein	3	2	120.9	5.83	at4g39050	31.1	cell.organisation
	2.07766	0.00836263	-1.77416	I1LYM0	DUF1681 domain-containing protein	23	4	30.7	6.68	at1g03900	35.2	not assigned.unknown
	1.87262	0.0134085	-1.93603	K7K3E3	Uncharacterized protein	4	3	147.9	5.27	at5g01400	35.2	not assigned.unknown
	1.38138	0.0415544	-1.95522	A0A0R0I9A1	3-ketoacyl-CoA synthase (EC 2.3.1.-)	14	4	56.1	8.9	at1g68530	16.7	secondary metabolism.wax
	5.37149	4.25122e-06	-2.25264	I1LHJ6	SHNi-TPR domain-containing protein	23	6	50.1	4.54	at4g37210	35.1.5	not assigned.no ontology.pentatricopeptide (PPR) repeat-containing protein
	1.91533	0.0121525	-2.26754	C6T390	Uncharacterized protein	55	6	16.2	5.91	at1g19530	35.2	not assigned.unknown
	2.45361	0.00351879	-2.38258	K7KVD9	Uncharacterized protein	4	2	73.5	6.42	at5g23570	27.3.99	RNA.regulation of transcription.unclassified
	1.78308	0.0164786	-2.64705	I1MFV0	Uncharacterized protein	11	9	152.5	6.19	at3g13290	33.99	development.unspecified
	1.89049	0.012868	-4.10727	C6T020	Glutathione peroxidase	33	3	18.7	5.72	at2g31570	21.2.2	redox.ascorbate and glutathione.glutathione
	2.54862	0.00282734	-4.34603	K7K8V7	C2 domain-containing protein	2	3	229.9	5.62	at1g77460	35.1.19	not assigned.no ontology.C2 domain-containing protein
	3.46737	0.000340903	-5.83817	K7MPG5	Uncharacterized protein	28	6	42.4	8.29	at4g39660	13.1.1.3.11	amino acid metabolism.synthesis.central amino acid metabolism.alanine.alanine-glyoxylate aminotransferase

## Sheet: Supplemental Table S2
Supplemental Table 2. List of changed proteins in mutant line compared with wild type soybean under flooding stress.
Significant	#NAME?	p-value	Difference	Accession	Protein names	Coverage in Percent	Number of Peptides	MW in kDa	calc pI	TAIR ID	Bin codes	MapMan function
	2.77042	0.0016966	3.32285	C6T2R5	RNase H domain-containing protein	14	2	26.7	7.34	at5g42905	35.2	not assigned.unknown
	5.02473	9.44643e-06	3.21026	I1JZK8	t-SNARE coiled-coil homology domain-containing protein	10	2	33.3	7.14	at5g61210	31.4	cell.vesicle transport
	1.38979	0.040758	3.13143	K7N4G1	Uncharacterized protein	33	10	46.6	6.79	at5g58330	8.2.9	TCA / org. transformation.other organic acid transformaitons.cyt MDH
	1.40233	0.0395978	3.08882	I1NGD0	Lipoxygenase (EC 1.13.11.-)	12	6	97.9	6.7	at3g22400	17.7.1.2	hormone metabolism.jasmonate.synthesis-degradation.lipoxygenase
	2.97073	0.00106973	2.66685	K7MQS3	Peptidase A1 domain-containing protein	16	3	52	8.12	at5g10770	27.3.99	RNA.regulation of transcription.unclassified
	2.15455	0.00700571	2.2582	A0A0R0KUR1	Phenylalanine ammonia-lyase (EC 4.3.1.24)	20	9	77.9	6.42	at2g37040	16.2.1.1	secondary metabolism.phenylpropanoids.lignin biosynthesis.PAL
	1.54501	0.0285097	2.0875	C6T2W1	SHSP domain-containing protein	24	3	21.9	6.71	at4g10250	20.2.1	stress.abiotic.heat
	1.32905	0.0468763	1.90523	I1K6B1	NAB domain-containing protein	5	4	139.4	4.94	at5g41790	30.11.1	signalling.light.COP9 signalosome
	2.45574	0.00350155	1.68016	I1J7C0	Uncharacterized protein	11	2	37.3	4.88	at5g17620	35.2	not assigned.unknown
	1.4243	0.0376447	1.66453	I1MXD5	Uncharacterized protein	6	2	53.2	5.58	at4g32940	29.3.4.3	protein.targeting.secretory pathway.vacuole
	1.45053	0.0354384	1.59143	I1LM80	Sucrose synthase (EC 2.4.1.13)	5	3	95.7	6.99	at1g73370	2.2.1.5	major CHO metabolism.degradation.sucrose.Susy
	1.43391	0.0368204	1.50096	I1LRM9	Uncharacterized protein	12	2	50.4	7.08	at2g35860	35.1	not assigned.no ontology
	3.74652	0.000179257	1.41741	I1L0J1	Uncharacterized protein	5	2	52.9	5.16	at1g30690	34.99	transport.misc
	1.34099	0.0456053	1.34208	I1JK18	Translocase of chloroplast (EC 3.6.5.-)	23	4	34.9	9.33	at5g05000	29.3.3	protein.targeting.chloroplast
	1.87081	0.0134643	1.23528	A0A0R0FUC5	Uncharacterized protein	21	3	21.4	5.29	at3g18430	30.3	signalling.calcium
	2.71321	0.00193547	1.23023	I1KZ04	Cytochrome b561 and DOMON domain-containing protein	13	3	43.2	9.38	at3g25290	17.2.3	hormone metabolism.auxin.induced-regulated-responsive-activated
	1.94257	0.0114138	1.11088	A8C8H5	Glutamate decarboxylase (EC 4.1.1.15)	59	19	57.2	5.82	at2g02010	13.1.1.1.1	amino acid metabolism.synthesis.central amino acid metabolism.GABA.Glutamate decarboxylase
	1.53751	0.029006	1.06863	I1M8S3	Uncharacterized protein	36	15	82.1	7.39	at5g67360	29.5.1	protein.degradation.subtilases
	1.74764	0.0178796	1.01611	A0A0R0GIU4	Peroxidase (EC 1.11.1.7)	24	5	35.2	7.83	at5g05340	26.12	misc.peroxidases
	1.4782	0.0332504	0.997928	C6SZQ8	Phytocyanin domain-containing protein	24	2	17.3	6.76	at1g72230	26.19	misc.plastocyanin-like
	1.31586	0.0483214	0.980143	I1L3X9	Sucrose synthase (EC 2.4.1.13)	11	6	104.1	7.06	at1g73370	2.2.1.5	major CHO metabolism.degradation.sucrose.Susy
	2.37055	0.00426042	0.976852	I1KM99	Uncharacterized protein	30	8	54.6	4.68	at5g22480	27.3.11	RNA.regulation of transcription.C2H2 zinc finger family
	1.49232	0.0321869	0.904243	I1MHW9	Uncharacterized protein	12	4	59.1	6.11	at5g34940	35.1	not assigned.no ontology
	1.7321	0.0185312	0.897594	I1KMW1	Uncharacterized protein	23	3	27.6	6.02	at4g16060	35.2	not assigned.unknown
	2.25879	0.00551074	0.864237	I1MX49	Uncharacterized protein	22	6	46	6.35	at4g31810	11.9.4.3	lipid metabolism.lipid degradation.beta-oxidation.enoyl CoA hydratase
	1.47029	0.0338619	0.838283	K7M8I6	Uncharacterized protein	6	3	60.9	6.55	at1g76040	30.3	signalling.calcium
	1.43279	0.0369159	0.805678	I1MMC2	t-SNARE coiled-coil homology domain-containing protein	18	3	30	6.32	at5g46860	31.4	cell.vesicle transport
	2.88765	0.00129523	0.769294	I1KMW4	TPR_REGION domain-containing protein	12	4	50	8.18	at3g16760	35.1.5	not assigned.no ontology.pentatricopeptide (PPR) repeat-containing protein
	1.347	0.0449785	0.726047	K7KQQ0	Uncharacterized protein	13	2	30.8	7.28	at1g77700	20.1	stress.biotic
	1.56352	0.0273198	0.687198	I1J414	Uncharacterized protein	8	3	38.4	5.86	at5g08540	35.2	not assigned.unknown
	1.5881	0.0258169	0.62974	I1LF63	Importin N-terminal domain-containing protein	30	14	99.4	5.05	at2g16950	29.3.1	protein.targeting.nucleus
	1.31574	0.0483351	0.621034	K7L479	J domain-containing protein	8	4	103.3	6.55	at4g12770	31.4	cell.vesicle transport
	1.48822	0.0324925	0.614133	C6SXC9	Prefoldin subunit 4	34	3	14.7	4.46	at1g08780	33.99	development.unspecified
	2.13121	0.00739253	-0.602042	C6THF2	Uncharacterized protein	14	2	31.5	5.36	at1g32400	33.99	development.unspecified
	1.39642	0.0401399	-0.623391	C6SVK3	PITH domain-containing protein	21	2	22.7	5.27	at2g25950	35.2	not assigned.unknown
	2.19509	0.00638129	-0.626188	I1LLG3	Peptidase A1 domain-containing protein	29	6	46.8	9.01	at5g07030	27.3.67	RNA.regulation of transcription.putative transcription regulator
	1.57494	0.0266112	-0.630676	A0A0R0KFR5	Uncharacterized protein	13	2	31.6	9.55	at3g47300	15	metal handling
	1.43166	0.0370119	-0.63564	A0A0R0HN41	Uncharacterized protein (Fragment)	61	4	12	4.46	at4g15802	35.2	not assigned.unknown
	1.39302	0.0404557	-0.646993	I1J5A5	Aldedh domain-containing protein	50	16	58.4	6.84	at1g23800	5.1	fermentation.aldehyde dehydrogenase
	3.07758	0.00083642	-0.653427	I1N5M3	Elongation factor Ts, mitochondrial (EF-Ts) (EF-TsMt)	7	2	38.3	8.24	at4g11120	29.2.4	protein.synthesis.elongation
	1.4833	0.0328626	-0.660858	C6FF81	Receptor-like serine/threonine kinase	7	6	146.9	7.65	at1g53440	30.2.8.2	signalling.receptor kinases.leucine rich repeat VIII-2
	1.75794	0.0174607	-0.710426	A0A0R0ICF9	Pectinesterase (EC 3.1.1.11)	20	2	35.4	6.34	at3g29090	10.8.1	cell wall.pectin*esterases.PME
	3.34758	0.000449182	-0.724526	I1K108	Uncharacterized protein	52	18	69.1	7.93	at4g18030	20.2.3	stress.abiotic.drought/salt
	1.32241	0.0475977	-0.74552	I1KN20	Uncharacterized protein	6	2	54.8	5.15	at5g18580	31.1	cell.organisation
	1.50209	0.0314706	-0.761855	I1N842	Xyloglucan endotransglucosylase/hydrolase (EC 2.4.1.207)	28	7	34.1	7.71	at5g13870	10.7	cell wall.modification
	2.24757	0.00565502	-0.7811	K7LKM1	Peptidase_M28 domain-containing protein	10	5	99.7	7.62	at5g20660	29.5	protein.degradation
	1.48928	0.0324132	-0.811537	K7MAX3	Uncharacterized protein	2	2	186.9	6.9	at5g47690	35.2	not assigned.unknown
	2.42672	0.00374354	-0.814562	I1M4L7	Beta-galactosidase (EC 3.2.1.23)	12	5	91.6	6.76	at2g28470	26.3.2	misc.gluco-, galacto- and mannosidases.beta-galactosidase
	2.09764	0.0079866	-0.834384	I1KJ00	Uncharacterized protein	14	3	28.2	5.43	at1g18390	30.2.20	signalling.receptor kinases.wheat LRK10 like
	1.39706	0.0400813	-0.84127	A0A0R4J508	Expansin	11	2	27.9	9.26	at2g39700	10.7	cell wall.modification
	2.1658	0.00682651	-0.853985	C6SX09	Uncharacterized protein (Fragment)	34	7	29.2	6.35	at1g64200	34.1.1	transport.p- and v-ATPases.H+-transporting two-sector ATPase
	1.67358	0.021204	-0.855289	M1FIP8	NADH-ubiquinone oxidoreductase chain 5 (EC 7.1.1.2)	9	4	74	7.84	atmg00513	9.1.2	mitochondrial electron transport / ATP synthesis.NADH-DH.localisation not clear
	1.65774	0.0219915	-0.855311	I1MCF0	Uncharacterized protein	23	5	45.2	6.43	at1g15330	35.1	not assigned.no ontology
	2.19642	0.00636178	-0.860151	C6SYC0	Ribosomal_L18e/L15P domain-containing protein	16	3	27.6	10.99	at3g25920	29.2.1.1.1.2.15	protein.synthesis.ribosomal protein.prokaryotic.chloroplast.50S subunit.L15
	1.49188	0.0322199	-0.871477	I1MY52	PKS_ER domain-containing protein	22	4	39.4	7.33	at4g39330	16.2.1.10	secondary metabolism.phenylpropanoids.lignin biosynthesis.CAD
	1.45855	0.0347896	-0.910641	C6TMZ4	Fe2OG dioxygenase domain-containing protein	30	5	36	5.38	at1g05010	17.5.1.2	hormone metabolism.ethylene.synthesis-degradation.1-aminocyclopropane-1-carboxylate oxidase
	1.60476	0.0248453	-0.926125	K7MJA4	Uncharacterized protein	1	2	186.8	7.14	at5g47690	35.2	not assigned.unknown
	1.53587	0.029116	-1.01064	C6TNM5	Uncharacterized protein	17	3	36.4	7.17	at5g58220	35.2	not assigned.unknown
	2.10837	0.00779167	-1.0379	I1N9W1	Uncharacterized protein	5	5	161.4	8.87	at1g15520	34.16	transport.ABC transporters and multidrug resistance systems
	2.59828	0.00252187	-1.08069	K7MNN1	Aminotran_1_2 domain-containing protein	12	3	52.8	7.94	at4g36480	11.8.1	lipid metabolism.''exotics'' (steroids, squalene etc).sphingolipids
	2.55221	0.00280405	-1.14742	C6SXF0	Uncharacterized protein	23	3	22.6	10.23	at1g74970	29.2.1.1.1.1.9	protein.synthesis.ribosomal protein.prokaryotic.chloroplast.30S subunit.S9
	1.60968	0.024565	-1.17156	I1M192	Uncharacterized protein	26	5	33.3	5.81	at5g18900	26.7	misc.oxidases - copper, flavone etc.
	2.12517	0.00749609	-1.37226	I1J730	Peptidylprolyl isomerase (EC 5.2.1.8)	18	7	69.9	5.57	at3g54010	31.3.1	cell.cycle.peptidylprolyl isomerase
	1.66792	0.0214824	-1.4347	Q8RVH5	Basic 7S globulin 2 (SBg7S) (Bg) [Cleaved into: Basic 7S globulin 2 high kDa subunit;Basic 7S globulin 2 low kDa subunit]	40	8	47.2	8.25	at1g03220	29.5.4	protein.degradation.aspartate protease
	3.01933	0.000956473	-1.46481	I1JNW2	tRNA (guanine-N(7)-)-methyltransferase non-catalytic subunit (WD repeat-containing protein 4 homolog)	16	3	44.7	5.91	at1g03110	35.1	not assigned.no ontology
	1.6905	0.0203937	-1.47556	C6T3E5	MPN domain-containing protein	39	4	22.9	5.78	at5g55940	35.2	not assigned.unknown
	1.37541	0.0421297	-1.49997	I1JQZ9	Uncharacterized protein	10	3	83.9	7.23	at5g26742	27.1.2	RNA.processing.RNA helicase
	1.62176	0.0238914	-1.55992	Q2MJR4	Myo-inositol-1-phosphate synthase	40	9	56.4	5.67	at5g10170	3.4.3	minor CHO metabolism.myo-inositol.InsP Synthases
	2.48663	0.00326118	-1.58037	I1MNI2	Uncharacterized protein	16	3	39.6	6.8	at4g36810	16.1.1.10	secondary metabolism.isoprenoids.non-mevalonate pathway.geranylgeranyl pyrophosphate synthase
	2.65402	0.00221807	-1.75124	C6TJK9	Peptidyl-prolyl cis-trans isomerase (PPIase) (EC 5.2.1.8)	10	2	28.3	8.6	at3g62030	31.3.1	cell.cycle.peptidylprolyl isomerase
	1.84289	0.0143584	-1.80127	Q8LGT8	Phosphoglycerate mutase-like protein	20	4	31.8	6.34	at5g64460	35.2	not assigned.unknown
	1.60062	0.025083	-1.81762	I1MZV7	Uncharacterized protein	5	2	49.6	8.68	at5g58470	27.3.99	RNA.regulation of transcription.unclassified
	1.4374	0.0365255	-1.86363	A0A0R0HMK4	Uncharacterized protein	8	2	46.1	7.5	at4g36945	30.4.4	signalling.phosphinositides.phosphoinositide phospholipase C
	1.38304	0.0413965	-2.00194	I1KG57	Uncharacterized protein	32	9	46.6	5.88	at3g21190	35.2	not assigned.unknown
	1.49973	0.0316426	-2.02811	K7LYU8	Uncharacterized protein	7	2	66.9	7.18	at5g56900	27.3.99	RNA.regulation of transcription.unclassified
	2.13597	0.00731195	-2.07865	P26413	Heat shock 70 kDa protein	53	25	70.8	5.49	at1g16030	20.2.1	stress.abiotic.heat
	1.55303	0.0279877	-2.26748	A0A0R0LJE6	Uncharacterized protein	4	2	83.1	7.11	at4g19040	20.1	stress.biotic
	1.34299	0.0453949	-2.40735	I1MTI4	Protein kinase domain-containing protein	8	2	43.7	7.65	at5g50000	29.4	protein.postranslational modification
	2.54006	0.00288362	-2.64021	I1K3E9	CULLIN_2 domain-containing protein	10	6	88.5	7.65	at5g46210	29.5.11.4.3.3	protein.degradation.ubiquitin.E3.SCF.cullin
	2.04402	0.00903603	-2.8521	C6TKV3	DHO_dh domain-containing protein	35	9	46.1	5.96	at3g17810	23.2	nucleotide metabolism.degradation
	2.10862	0.00778724	-2.8558	I1M1T9	ALOG domain-containing protein	20	3	20.2	9.72	at2g42610	35.2	not assigned.unknown
	2.90176	0.00125384	-3.14303	I1KLU0	Mitogen-activated protein kinase (EC 2.7.11.24)	27	7	49.9	5.96	at2g43790	30.6	signalling.MAP kinases
	2.83221	0.00147161	-3.54867	C6TJZ9	Uncharacterized protein	16	5	38.7	5.01	at1g07750	33.1	development.storage proteins
	2.48622	0.00326425	-6.10277	I1K2B5	Uncharacterized protein	20	9	79.6	6.6	at5g67360	29.5.1	protein.degradation.subtilases
	3.77414	0.000168212	-6.75095	I1LEX5	Uncharacterized protein	28	6	42.9	4.84	at3g02540	29.5.11.1	protein.degradation.ubiquitin.ubiquitin

## Sheet: Supplemental Table S3
Supplemental Table 3. List of changed proteins in wild type soybean under flooding stress compared with non-flooding condition.
Significant	#NAME?	p-value	Difference	Accession	Protein names	Coverage in Percent	Number of Peptides	MW in kDa	calc pI	TAIR ID	Bin codes	MapMan function
+	3.71257	0.000193834	11.0852	Q0WX05	Polygalacturonase inhibiting protein	50	10	36.8	8.34	at5g06860	10.6.3	cell wall.degradation.pectate lyases and polygalacturonases
+	2.72778	0.00187163	9.17023	I1JY29	Uncharacterized protein	42	10	41.2	6	at1g77120	5.3	fermentation.ADH
+	3.81692	0.000152433	8.11636	C6TMH1	ZnMc domain-containing protein	12	2	40.1	5.63	at1g59970	29.5.7	protein.degradation.metalloprotease
+	5.10414	7.86799e-06	8.04705	Q42785	Nonsymbiotic hemoglobin	22	3	18	8.92	at2g16060	21.3	redox.heme
+	4.55086	2.81281e-05	7.7919	A0A0R0KF48	Uncharacterized protein	41	14	65.2	6.21	at5g01320	5.2	fermentation.PDC
+	5.64487	2.26532e-06	7.18043	C6T390	Uncharacterized protein	55	6	16.2	5.91	at1g19530	35.2	not assigned.unknown
+	2.78001	0.00165957	7.0691	I1LJK0	Uncharacterized protein	52	3	7.9	6.6	unknown	unknown	unknown
+	3.95933	0.000109816	7.00656	I1NF01	Uncharacterized protein	13	8	80.1	6.13	at1g15690	34.3	transport.H+ transporting pyrophosphatase
+	3.86852	0.000135355	6.97694	A0A0R0GEW3	Uncharacterized protein	11	3	30.6	6.8	at4g38260	35.2	not assigned.unknown
+	2.94295	0.00114038	6.64485	I1LL87	Uncharacterized protein	18	2	19.3	4.96	at2g41430	20.2.3	stress.abiotic.drought/salt
+	3.51892	0.000302748	6.56902	I1L3I1	Lectin_legB domain-containing protein	12	3	33.2	5.1	at5g10530	30.2.19	signalling.receptor kinases.legume-lectin
+	3.89178	0.000128299	6.46171	I1K9M3	Uncharacterized protein	21	7	73	5.3	at1g09890	10.6.3	cell wall.degradation.pectate lyases and polygalacturonases
+	2.95247	0.00111566	6.33289	C6TMB5	Uncharacterized protein	45	5	17.8	8.97	at2g37190	29.2.1.2.2.12	protein.synthesis.ribosomal protein.eukaryotic.60S subunit.L12
+	4.23485	5.82304e-05	6.1785	C6TMH8	Ribosomal protein L19	21	2	24.7	11.44	at3g16780	29.2.1.2.2.19	protein.synthesis.ribosomal protein.eukaryotic.60S subunit.L19
+	2.73028	0.0018609	6.06941	I1MV69	Uncharacterized protein	25	4	27.5	9.2	at4g17030	10.7	cell wall.modification
+	2.70928	0.00195309	5.80793	I1KJ00	Uncharacterized protein	14	3	28.2	5.43	at1g18390	30.2.20	signalling.receptor kinases.wheat LRK10 like
+	2.57986	0.00263114	5.7866	I1KR99	LRRNT_2 domain-containing protein	16	3	37.4	7.91	at5g06860	10.6.3	cell wall.degradation.pectate lyases and polygalacturonases
+	3.47274	0.000336715	5.70149	C6TFF5	Uncharacterized protein	26	2	11.1	10.45	at5g25940	33.99	development.unspecified
+	3.0906	0.000811706	5.57969	C6T229	Uncharacterized protein	32	2	8	8.84	at5g65207	35.2	not assigned.unknown
+	3.5041	0.000313259	5.57475	C6T9K9	Elongation factor Tu	49	17	49.8	7.05	at4g02930	29.2.4	protein.synthesis.elongation
+	2.50522	0.00312447	5.51681	A0A0R0IID0	Uncharacterized protein	31	4	24	6.02	at1g17860	20.1.7.6.1	stress.biotic.PR-proteins.proteinase inhibitors.trypsin inhibitor
+	3.37199	0.000424631	5.41662	C6TDV4	LRRNT_2 domain-containing protein	7	2	36.2	8.43	at5g06860	10.6.3	cell wall.degradation.pectate lyases and polygalacturonases
+	3.02165	0.000951373	5.22232	Q0WX04	Polygalacturonase inhibiting protein	19	3	37.5	8.91	at5g06860	10.6.3	cell wall.degradation.pectate lyases and polygalacturonases
+	3.49725	0.00031824	5.01001	A0A0R0K553	Fe2OG dioxygenase domain-containing protein	38	8	34.8	5.58	at2g19590	17.5.1.2	hormone metabolism.ethylene.synthesis-degradation.1-aminocyclopropane-1-carboxylate oxidase
+	3.31568	0.00048342	4.80412	I1KZW3	Uncharacterized protein	32	6	32.8	5.92	at4g04210	29.5	protein.degradation
+	3.41763	0.000382267	4.60018	C6SYA5	60S ribosomal protein L18a	29	4	21.3	10.42	at2g34480	29.2.1.2.2.518	protein.synthesis.ribosomal protein.eukaryotic.60S subunit.L18A
+	2.28944	0.00513525	4.4636	I1LC49	Peptidase A1 domain-containing protein	18	4	47.3	8.24	at1g03220	29.5.4	protein.degradation.aspartate protease
+	3.94167	0.000114375	4.30806	I1LT24	DUF3700 domain-containing protein	33	6	28	6.68	at4g27450	17.2.3	hormone metabolism.auxin.induced-regulated-responsive-activated
+	6.19062	6.44727e-07	4.2615	K7MID0	Uncharacterized protein	8	4	96.9	6.39	at5g52300	20.2.2	stress.abiotic.cold
+	2.6303	0.0023426	4.2281	I1K9W9	Uncharacterized protein	14	2	34.7	8.54	at4g08950	30.1.1	signalling.in sugar and nutrient physiology
+	2.97887	0.00104986	4.13081	A0A0R4J4G7	Uncharacterized protein	15	2	29.4	6.79	at1g52340	17.1.1.1.11	hormone metabolism.abscisic acid.synthesis-degradation.synthesis.short chain alcohol dehydrogenmase (ABA2)
+	2.24353	0.00570786	4.11168	I1KBD1	Protein kinase domain-containing protein	4	2	129.2	6.74	at4g39400	17.3.2.1	hormone metabolism.brassinosteroid.signal transduction.BRI
+	2.69042	0.00203974	4.02255	C6TC19	Rhodanese domain-containing protein	13	2	16.4	8.25	at2g17850	29.4	protein.postranslational modification
+	3.62319	0.000238129	3.96598	I1K467	Uncharacterized protein	50	18	59	6.51	at3g20050	29.6	protein.folding
+	1.31327	0.0486107	3.96461	I1KNR7	Uncharacterized protein	3	2	81.5	6.37	at5g49880	31.2	cell.division
+	2.97878	0.00105008	3.9423	I1NF42	Uncharacterized protein	17	5	43.5	4.84	at5g08580	30.3	signalling.calcium
+	2.46637	0.00341687	3.93607	I1KP32	UVR domain-containing protein	39	23	102.1	6.8	at5g50920	29.5.5	protein.degradation.serine protease
+	1.48833	0.0324841	3.89559	I1K657	RPN13_C domain-containing protein	35	5	36.1	4.44	at2g26590	35.1	not assigned.no ontology
+	2.47325	0.00336316	3.89322	A0A0R4J4H3	Nascent polypeptide-associated complex subunit beta	67	11	17.7	7.4	at1g17880	27.3.50	RNA.regulation of transcription.General Transcription
+	2.1749	0.00668505	3.87553	I1KMK2	Uncharacterized protein	4	3	162.5	8.13	at3g53480	34.16	transport.ABC transporters and multidrug resistance systems
+	5.12822	7.44353e-06	3.8491	C6THW8	DUF3700 domain-containing protein	40	7	28	6.61	at4g27450	17.2.3	hormone metabolism.auxin.induced-regulated-responsive-activated
+	2.05436	0.00882347	3.81219	I1N846	Uncharacterized protein	27	11	83.9	6.73	at5g36880	11.1.8	lipid metabolism.FA synthesis and FA elongation.acyl coa ligase
+	2.66553	0.0021601	3.81174	I1JQU3	AMP-binding domain-containing protein	6	2	74.4	7.18	at2g47240	11.1.9	lipid metabolism.FA synthesis and FA elongation.long chain fatty acid CoA ligase
+	2.06476	0.00861466	3.78798	K7LSP6	WD_REPEATS_REGION domain-containing protein	7	2	37.2	5.1	at2g34260	35.1	not assigned.no ontology
+	4.02503	9.44006e-05	3.77749	C6TLA6	DUF3700 domain-containing protein	20	3	27.5	7.37	at4g27450	17.2.3	hormone metabolism.auxin.induced-regulated-responsive-activated
+	2.50573	0.00312084	3.75806	C6T721	Aldose 1-epimerase (EC 5.1.3.3) (Galactose mutarotase)	13	3	40.6	9.28	at5g15140	3.5	minor CHO metabolism.others
+	2.13271	0.00736701	3.68243	I1J8C9	Rab proteins geranylgeranyltransferase component	13	3	60.6	4.87	at3g06540	30.5	signalling.G-proteins
+	1.78367	0.0164561	3.66625	I1MQG3	Uncharacterized protein	28	3	22.2	5.21	at1g17860	20.1.7.6.1	stress.biotic.PR-proteins.proteinase inhibitors.trypsin inhibitor
+	1.4578	0.0348498	3.5975	C6TKX3	Uncharacterized protein	8	2	27.2	6.4	at3g54300	31.4	cell.vesicle transport
+	3.57338	0.000267067	3.50677	K7MFQ7	Uncharacterized protein	15	6	68.8	8.5	at1g31850	20.2.3	stress.abiotic.drought/salt
+	1.30565	0.0494712	3.50111	I1JS15	Uncharacterized protein	5	3	116.8	6.58	at1g01220	10.1.1.2	cell wall.precursor synthesis.NDP sugar pyrophosphorylase.GDP fucose and fucokinase
+	3.56206	0.000274122	3.45113	I1MAE6	PKS_ER domain-containing protein	39	11	40.8	6.52	at1g77120	5.3	fermentation.ADH
+	2.088	0.0081658	3.327	I1LVI3	Uncharacterized protein	12	9	100.1	9.07	at1g59610	26.17	misc.dynamin
+	2.00654	0.00985053	3.3245	Q948X9	Beta-conglycinin alpha-subunit	7	3	72.4	5.4	at3g22640	33.1	development.storage proteins
+	2.16599	0.00682353	3.31529	I1ME27	Uncharacterized protein	3	2	140.8	6.15	at5g64420	28.2	DNA.repair
+	3.28044	0.000524274	3.30993	C6TCK6	Uncharacterized protein	13	2	25.8	6.86	at1g67360	35.1	not assigned.no ontology
+	2.28129	0.00523249	3.29718	C6SXR2	Ribosomal protein L19	21	2	24.6	11.44	at3g16780	29.2.1.2.2.19	protein.synthesis.ribosomal protein.eukaryotic.60S subunit.L19
+	2.90257	0.00125151	3.28934	I1J6C3	Arf-GAP domain-containing protein	34	8	43.2	8.92	at4g17890	29.5.11.5	protein.degradation.ubiquitin.ubiquitin protease
+	1.63814	0.0230071	3.21553	I1KQE2	Uncharacterized protein	59	9	34.6	7.81	at3g20000	29.3.2	protein.targeting.mitochondria
+	3.80395	0.000157055	3.1936	A0A0R4J594	Peroxidase (EC 1.11.1.7)	24	5	34.8	7.9	at2g41480	26.12	misc.peroxidases
+	1.97382	0.0106214	3.18585	Q42447	Maturation protein (Maturation-associated protein)	27	3	25.6	6.52	unknown	unknown	unknown
+	2.01463	0.00966883	3.17845	A0A0R0FZI3	AB hydrolase-1 domain-containing protein	9	2	33.6	6.54	at2g23620	26.8	misc.nitrilases, *nitrile lyases, berberine bridge enzymes, reticuline oxidases, troponine reductases
+	2.04202	0.00907776	3.13656	P11827	Beta-conglycinin alpha' subunit (CG-alpha'-1) (Beta-conglycinin alpha prime subunit) (allergen Gly m 5)	18	8	72.2	5.71	at3g22640	33.1	development.storage proteins
+	4.77976	1.66051e-05	3.10032	K7MNG2	Cytosolic Fe-S cluster assembly factor NBP35	30	6	38.2	4.84	at5g50960	18.7	Co-factor and vitamine metabolism.iron-sulphur clusters
+	2.0786	0.00834445	3.06082	K7KRK2	Uncharacterized protein	17	3	31.5	6.44	at1g07210	29.2.1.1.3.1.18	protein.synthesis.ribosomal protein.prokaryotic.unknown organellar.30S subunit.S18
+	1.9205	0.0120088	2.99557	I1MBS4	Usp domain-containing protein	27	3	18	9.41	at3g03270	33.99	development.unspecified
+	4.0539	8.83281e-05	2.95618	I1M7P3	Uncharacterized protein	34	2	14.7	4.93	at4g14270	35.2	not assigned.unknown
+	2.34892	0.00447796	2.94918	I1LRQ2	NEDD8-activating enzyme E1 regulatory subunit	21	5	57.9	5.24	at1g05180	17.2.2	hormone metabolism.auxin.signal transduction
+	2.36893	0.00427627	2.94185	Q9SEL0	Seed maturation protein PM24	20	3	26.8	5.33	at3g22490	33.2	development.late embryogenesis abundant
+	2.37989	0.00416974	2.92489	I1NCN7	Uncharacterized protein	5	3	115.7	6.46	at1g01220	10.1.1.2	cell wall.precursor synthesis.NDP sugar pyrophosphorylase.GDP fucose and fucokinase
+	2.26339	0.00545262	2.91141	I1LVS8	Xyloglucan endotransglucosylase/hydrolase (EC 2.4.1.207)	10	2	33.2	8.02	at4g25810	10.7	cell wall.modification
+	1.45216	0.0353055	2.90616	K7KSU9	GYF domain-containing protein	2	2	197.7	6.47	at5g42950	35.1	not assigned.no ontology
+	5.52845	2.96173e-06	2.90432	A0A024BT07	Acyl-[acyl-carrier-protein] desaturase (EC 1.14.19.-)	12	4	44	7.23	at1g43800	11.1.15	lipid metabolism.FA synthesis and FA elongation.ACP desaturase
+	2.87241	0.00134151	2.87342	Q01527	Maturation protein (Soybean seed maturation polypeptides)	38	2	15.6	9.66	at5g06760	33.2	development.late embryogenesis abundant
+	2.03764	0.00916976	2.83613	C6TKW5	MHD domain-containing protein	7	2	49.7	7.18	at4g24550	29.3.4.99	protein.targeting.secretory pathway.unspecified
+	2.59331	0.00255085	2.83351	P26413	Heat shock 70 kDa protein	53	25	70.8	5.49	at1g16030	20.2.1	stress.abiotic.heat
+	3.12281	0.00075369	2.83133	A0A0R4J364	Uncharacterized protein	67	16	40.9	6.4	at1g77120	5.3	fermentation.ADH
+	1.30215	0.0498711	2.77637	K7LSZ2	AA_TRNA_LIGASE_II domain-containing protein	15	5	62.8	6.49	at4g39280	29.1.20	protein.aa activation.phenylalanine-tRNA ligase
+	2.30887	0.00491051	2.77442	A0A0G4DBR5	UDP-glycosyltransferase 79B30 (EC 2.4.1.239) (Flavonol 3-O-glucoside/galactoside (1->2) glucosyltransferase) (GmF3G2"Gt-a)	10	2	51.1	5.78	at5g54010	16.8.3	secondary metabolism.flavonoids.dihydroflavonols
+	1.6966	0.0201095	2.77383	I1KQV7	Uncharacterized protein	38	19	72.5	6.04	at5g09590	20.2.1	stress.abiotic.heat
+	1.49994	0.031627	2.73308	P51061	Phosphoenolpyruvate carboxylase (PEPC) (PEPCase) (EC 4.1.1.31)	52	39	110.7	6.47	at3g14940	4.1.16	glycolysis.cytosolic branch.phospho-enol-pyruvate carboxylase (PEPC)
+	2.65528	0.00221168	2.71461	I1MN40	VWFA domain-containing protein	15	3	42.4	4.73	at4g38630	29.5.11	protein.degradation.ubiquitin
+	4.36735	4.29186e-05	2.70381	I1M138	Peptidase A1 domain-containing protein	10	3	51.2	8	at1g03220	29.5.4	protein.degradation.aspartate protease
+	1.49485	0.0319999	2.69757	I1K0A8	Uncharacterized protein	28	9	48.5	5.4	at3g48530	10.5	cell wall.cell wall proteins
+	3.12669	0.000746978	2.68335	I1L1N3	Uncharacterized protein	10	2	25.2	5.63	at2g06530	27.3.71	RNA.regulation of transcription.SNF7
+	2.48725	0.00325649	2.64836	A0A0R0KSG7	Ribosomal protein L19	17	2	24.7	11.4	at3g16780	29.2.1.2.2.19	protein.synthesis.ribosomal protein.eukaryotic.60S subunit.L19
+	2.37753	0.00419251	2.64624	C6TDA6	Protein kinase domain-containing protein	7	2	50.9	4.54	at4g28980	31.3	cell.cycle
+	1.38484	0.0412254	2.64319	I1JG72	PlsC domain-containing protein	8	2	43.2	9.36	at3g57650	11.3.1	lipid metabolism.Phospholipid synthesis.1-acylglycerol-3-phosphate O-acyltransferase
+	1.38128	0.0415639	2.64009	I1JJ62	Citrate synthase (EC 2.3.3.16)	19	5	56.5	8.72	at2g42790	6.1	gluconeogenese/ glyoxylate cycle.citrate synthase
+	3.36662	0.000429917	2.61826	Q9ZTY1	35 kDa seed maturation protein	10	2	35.3	6.32	at2g36640	33.2	development.late embryogenesis abundant
+	4.38211	4.14854e-05	2.60439	A0A0R0KXL5	Uncharacterized protein	23	2	13.6	8.18	at4g39235	35.2	not assigned.unknown
+	1.89916	0.0126138	2.59926	K7MEI2	Exocyst subunit Exo70 family protein	8	2	75.6	6	at1g72470	31.4	cell.vesicle transport
+	4.25358	5.57726e-05	2.55858	I1MUP6	Uncharacterized protein	47	14	46.4	5.11	at3g48530	10.5	cell wall.cell wall proteins
+	1.43567	0.0366715	2.55069	A0A0B5E8W0	Tau class glutathione S-transferase	28	4	25.9	6.15	at3g09270	26.9	misc.glutathione S transferases
+	3.26877	0.000538554	2.53158	A0A0R4J2I4	Uncharacterized protein	43	16	65.6	5.94	at5g01320	5.2	fermentation.PDC
+	2.09062	0.00811663	2.52434	I1N627	PHB domain-containing protein	26	6	31.5	5.24	at5g62740	35.1	not assigned.no ontology
+	3.31648	0.000482531	2.47103	C6TB96	Uncharacterized protein	22	5	35.2	5.49	at2g21270	29.5.11	protein.degradation.ubiquitin
+	1.82579	0.0149352	2.47072	A0A0R0ENW6	Peptidase A1 domain-containing protein	35	8	46.3	8.53	at1g03220	29.5.4	protein.degradation.aspartate protease
+	2.10391	0.00787213	2.47054	I1JKK8	SEC7 domain-containing protein	9	11	198.7	5.66	at3g60860	30.5	signalling.G-proteins
+	1.82072	0.0151104	2.45313	I1MWJ3	Uncharacterized protein	19	2	19	9.48	at4g31360	35.2	not assigned.unknown
+	2.18963	0.00646208	2.44317	I1MR73	Uncharacterized protein	4	2	58	8.9	at1g11600	26.1	misc.cytochrome P450
+	1.42285	0.0377704	2.4345	I1KLU0	Mitogen-activated protein kinase (EC 2.7.11.24)	27	7	49.9	5.96	at2g43790	30.6	signalling.MAP kinases
+	3.66433	0.000216606	2.43369	C6TEY7	Ubiquitin thioesterase (EC 3.4.19.12)	39	6	33.8	4.91	at1g28120	35.2	not assigned.unknown
+	1.86024	0.0137963	2.41598	I1MWZ7	Aldedh domain-containing protein	16	5	53.2	7.61	at2g24270	4.1.10	glycolysis.cytosolic branch.non-phosphorylating glyceraldehyde 3-phosphate dehydrogenase (NPGAP-DH)
+	2.61945	0.00240186	2.39599	I1MCF0	Uncharacterized protein	23	5	45.2	6.43	at1g15330	35.1	not assigned.no ontology
+	2.54587	0.00284533	2.33554	I1K7R0	Uncharacterized protein	27	3	16.1	5.35	at1g19530	35.2	not assigned.unknown
+	2.29032	0.00512488	2.32309	K7KU37	Uncharacterized protein	2	2	147.2	5.94	at1g27595	33.99	development.unspecified
+	4.50829	3.10247e-05	2.31318	I1MEX0	MPN domain-containing protein	57	8	34.6	6.71	at5g23540	29.5.11.20	protein.degradation.ubiquitin.proteasom
+	1.30607	0.0494226	2.27538	C6T545	Uncharacterized protein	32	2	14.9	9.47	at1g16790	29.2.1.99.99	protein.synthesis.ribosomal protein.unknown.unknown
+	3.9722	0.000106612	2.25928	C6TME1	Uncharacterized protein	32	9	35.8	9.58	at1g67730	16.7	secondary metabolism.wax
+	3.48827	0.000324884	2.20672	I1L7R7	CTP synthase (EC 6.3.4.2) (UTP--ammonia ligase)	9	3	61.6	6.05	at4g02120	23.1.1.10	nucleotide metabolism.synthesis.pyrimidine.CTP synthetase
+	2.86251	0.00137243	2.18689	K7MVZ6	Glucose-6-phosphate isomerase (EC 5.3.1.9)	37	10	62.7	5.72	at5g42740	4.1.4	glycolysis.cytosolic branch.glucose-6-phosphate isomerase
+	2.06296	0.00865041	2.16063	C6TN86	Uncharacterized protein	10	2	38.3	6	at5g40510	35.2	not assigned.unknown
+	3.90906	0.000123295	2.13038	I1LUZ1	Uncharacterized protein	11	3	64	5.53	at3g15410	35.1	not assigned.no ontology
+	1.33335	0.0464139	2.1301	A0A0R0ETL8	Uncharacterized protein	33	13	64.3	8.15	at2g42520	27.1.2	RNA.processing.RNA helicase
+	1.77055	0.0169611	2.11691	I1K586	Protein kinase domain-containing protein	3	2	123.3	4.93	at1g73460	29.4	protein.postranslational modification
+	2.32952	0.0046825	2.11168	I1N0X9	Uncharacterized protein	5	3	118.3	6.54	at1g04920	2.1.1.1	major CHO metabolism.synthesis.sucrose.SPS
+	3.29426	0.000507858	2.09338	K7LDT9	Uncharacterized protein	9	5	103.3	6.76	at5g52300	20.2.2	stress.abiotic.cold
+	4.58651	2.59111e-05	2.09251	I1MEH8	Uncharacterized protein	41	6	22.2	7.2	at3g05500	35.1	not assigned.no ontology
+	2.42015	0.00380055	2.08839	I1LC12	SHSP domain-containing protein	30	4	22.4	6.02	at4g10250	20.2.1	stress.abiotic.heat
+	2.55884	0.00276162	2.08054	I1J8S7	Uncharacterized protein	46	7	29.3	6.73	at1g19580	9.1.1.5	mitochondrial electron transport / ATP synthesis.NADH-DH.complex I.carbonic anhydrase
+	2.40313	0.00395244	2.07917	I1JCQ0	Amino_oxidase domain-containing protein	11	4	60.8	6.9	at5g49555	16.1.4	secondary metabolism.isoprenoids.carotenoids
+	3.24903	0.000563596	2.07228	P04670	Uricase-2 isozyme 1 (EC 1.7.3.3) (Nodule-specific uricase) (Nodulin 35) (N-35) (Urate oxidase) (Uricase II isozyme 1)	46	12	35.1	7.97	at2g26230	23.2	nucleotide metabolism.degradation
+	2.35126	0.00445389	2.06998	K7LG16	Uncharacterized protein	7	3	109.1	5.67	at4g01290	35.2	not assigned.unknown
+	3.14357	0.000718511	2.06878	I1MQK0	Uncharacterized protein	16	3	41.7	5.78	at4g27760	33.99	development.unspecified
+	3.1871	0.000649979	2.06495	K7LF33	RBR-type E3 ubiquitin transferase (EC 2.3.2.31)	10	3	68.2	5.26	at1g32340	29.5.11.4.2	protein.degradation.ubiquitin.E3.RING
+	2.24722	0.00565958	2.06293	K7KNK3	Uncharacterized protein	26	2	11.2	10.96	at5g25940	33.99	development.unspecified
+	1.49592	0.0319209	2.05774	I1KU42	Uncharacterized protein	3	2	91.4	6.23	at1g79090	35.2	not assigned.unknown
+	3.1265	0.0007473	2.03718	C6TFW0	Uncharacterized protein	37	3	13.3	9.16	unknown	unknown	unknown
+	1.77634	0.0167365	2.03326	I1N7M0	RIBOSOMAL_L9 domain-containing protein	20	2	25.6	9.58	at5g53070	29.2.1.1.3.2.9	protein.synthesis.ribosomal protein.prokaryotic.unknown organellar.50S subunit.L9
+	3.41575	0.00038393	2.02967	K7L1E9	Fe2OG dioxygenase domain-containing protein	15	3	34.7	5.71	at2g19590	17.5.1.2	hormone metabolism.ethylene.synthesis-degradation.1-aminocyclopropane-1-carboxylate oxidase
+	3.64389	0.000227045	2.00369	I1MRW2	Importin N-terminal domain-containing protein	5	4	123.7	4.83	at3g17340	29.3.1	protein.targeting.nucleus
+	2.33262	0.00464918	1.98959	I1L7V7	Usp domain-containing protein	30	2	17.2	7.87	at2g47710	20.2.99	stress.abiotic.unspecified
+	2.88794	0.00129438	1.98795	A0A0R0IH39	Uncharacterized protein	2	2	212.1	7.31	at1g24706	35.2	not assigned.unknown
+	3.76684	0.000171064	1.97904	C6SVT0	Usp domain-containing protein	42	6	18	7.15	at3g62550	17.5.3	hormone metabolism.ethylene.induced-regulated-responsive-activated
+	1.86121	0.0137656	1.96345	K7MDW5	Uncharacterized protein	14	20	247.4	5.91	at1g20960	28.1	DNA.synthesis/chromatin structure
+	2.84891	0.00141608	1.93026	K7M034	BED-type domain-containing protein	8	6	122.7	5	at3g42170	28.99	DNA.unspecified
+	2.82319	0.00150249	1.92382	K7MPT4	TPR_REGION domain-containing protein	6	2	59.8	7.37	at5g37590	31.1	cell.organisation
+	2.83811	0.00145175	1.91533	A0A0R0KE56	Pectinesterase (EC 3.1.1.11)	27	5	32.2	8.7	at2g45220	10.8.99	cell wall.pectin*esterases.misc
+	2.46572	0.00342203	1.8894	I1KUE9	WD_REPEATS_REGION domain-containing protein	10	2	38.8	8.22	at1g80670	27.1	RNA.processing
+	2.86366	0.0013688	1.8374	C6SVM2	Uncharacterized protein	27	2	17.4	8.94	at2g21490	20.2.99	stress.abiotic.unspecified
+	4.46552	3.42359e-05	1.78415	C6K8D1	Seed biotinylated protein 68 kDa isoform	23	9	67.9	6.58	at2g42560	35.1.22	not assigned.no ontology.late embryogenesis abundant domain-containing protein
+	4.42307	3.77514e-05	1.77618	I1L3K7	Uncharacterized protein	64	17	48	6.29	at2g36530	4.1.14	glycolysis.cytosolic branch.enolase
+	1.78568	0.0163801	1.77538	A0A0R0JDS4	TP_methylase domain-containing protein	24	2	30.8	5.39	at4g31790	26.6	misc.O-methyl transferases
+	3.46262	0.000344651	1.76922	C6TNN5	ZnMc domain-containing protein	29	7	43.4	6.1	at1g59970	29.5.7	protein.degradation.metalloprotease
+	1.52904	0.0295773	1.76347	C6T063	ANK_REP_REGION domain-containing protein	36	2	16.8	4.63	at5g12320	31.1	cell.organisation
+	2.24605	0.00567475	1.73117	I1LM96	60S ribosomal export protein NMD3	8	3	58.5	6.73	at2g03820	35.1	not assigned.no ontology
+	1.9602	0.0109598	1.72432	I1LDX7	Uncharacterized protein	7	3	84.6	8.69	at5g51750	29.5.1	protein.degradation.subtilases
+	2.23602	0.00580735	1.71138	K7K676	AP-1 complex subunit gamma	21	10	95.5	6.51	at1g60070	31.4	cell.vesicle transport
+	2.7095	0.0019521	1.71093	I1J9W0	40S ribosomal protein S30	11	2	11.6	12.07	at5g56670	29.2.1.2.1.30	protein.synthesis.ribosomal protein.eukaryotic.40S subunit.S30
+	2.82554	0.00149439	1.70703	I1K301	Uncharacterized protein	59	7	14.8	5.71	at1g29850	35.1	not assigned.no ontology
+	4.18717	6.49878e-05	1.69799	I1M1V8	Uncharacterized protein	56	18	63.4	6.11	at5g54960	5.2	fermentation.PDC
+	3.32772	0.000470192	1.68298	A0A0R0H3L4	Poly [ADP-ribose] polymerase (PARP) (EC 2.4.2.-)	40	21	91.6	5.59	at5g22470	29.4	protein.postranslational modification
+	2.71736	0.00191706	1.6761	K7KNP4	Uncharacterized protein	6	8	213.8	6.13	at5g40480	29.3.1	protein.targeting.nucleus
+	1.49268	0.0321602	1.67006	I1MY42	Uncharacterized protein	2	2	135.6	7.58	at1g27940	34.16	transport.ABC transporters and multidrug resistance systems
+	2.71873	0.00191104	1.65392	A0A0R0F3E0	Histone H2A	21	2	15.5	10.71	at5g27670	28.1.3	DNA.synthesis/chromatin structure.histone
+	1.30349	0.0497177	1.63635	K7KUE8	DFP domain-containing protein	13	4	36.4	7.94	at1g12350	18.4.6	Co-factor and vitamine metabolism.pantothenate.phosphopantothenoylcysteine synthetase (PPCS)
+	3.28559	0.000518094	1.63518	K7MFC0	GYF domain-containing protein	5	7	179.2	6.23	at1g27430	35.1	not assigned.no ontology
+	1.72512	0.0188313	1.63328	Q8RVH5	Basic 7S globulin 2 (SBg7S) (Bg) [Cleaved into: Basic 7S globulin 2 high kDa subunit;Basic 7S globulin 2 low kDa subunit]	40	8	47.2	8.25	at1g03220	29.5.4	protein.degradation.aspartate protease
+	2.54244	0.00286788	1.63184	I1LWI3	PHB domain-containing protein	29	7	31.5	5.24	at5g62740	35.1	not assigned.no ontology
+	3.0482	0.000894948	1.62769	A0A0R4J3M4	Uncharacterized protein	41	15	65.1	6.27	at4g33070	5.2	fermentation.PDC
+	1.32764	0.0470279	1.62035	C6TIP6	Uncharacterized protein	10	3	54.5	8.25	at2g18190	29.5.9	protein.degradation.AAA type
+	1.89051	0.0128675	1.61991	K7M5G4	GYF domain-containing protein	3	3	205.6	6.46	at5g42950	35.1	not assigned.no ontology
+	3.17433	0.000669379	1.61185	K7KGC7	Sucrose synthase (EC 2.4.1.13)	41	31	92.2	6.13	at4g02280	2.2.1.5	major CHO metabolism.degradation.sucrose.Susy
+	4.58431	2.60428e-05	1.5894	K7MZJ0	Sucrose synthase (EC 2.4.1.13)	47	33	92.2	6.38	at4g02280	2.2.1.5	major CHO metabolism.degradation.sucrose.Susy
+	2.04749	0.00896408	1.5794	C6TE39	Ubiquinone biosynthesis O-methyltransferase, mitochondrial (3-demethylubiquinol 3-O-methyltransferase) (EC 2.1.1.64) (Polyprenyldihydroxybenzoate methyltransferase) (EC 2.1.1.114)	18	3	31.8	6.44	at2g30920	18.8.1	Co-factor and vitamine metabolism.ubiquinone.hexaprenyldihydroxybenzoate methyltransferase
+	2.7046	0.00197422	1.57891	A0A0R4J387	Chalcone-flavonone isomerase family protein	62	8	23.5	5	at5g05270	16.8.2	secondary metabolism.flavonoids.chalcones
+	3.16036	0.000691251	1.57653	I1KR17	Uncharacterized protein	21	3	32.5	8.76	at5g64260	30.1.1	signalling.in sugar and nutrient physiology
+	4.06129	8.68389e-05	1.53454	C6TEE9	Uncharacterized protein	55	10	30.4	6.09	at1g64980	35.2	not assigned.unknown
+	2.39159	0.00405896	1.53153	I1JIE0	Ferritin (EC 1.16.3.1)	38	8	28.1	6.89	at2g40300	15.2	metal handling.binding, chelation and storage
+	2.09037	0.00812137	1.52182	I1K9P4	ZF-HD dimerization-type domain-containing protein	18	2	32.4	6.52	at4g24660	27.3.80	RNA.regulation of transcription.zf-HD
+	2.80144	0.00157963	1.51737	K7LKJ0	HMA domain-containing protein	48	3	8.6	6.6	at1g66240	15.2	metal handling.binding, chelation and storage
+	1.36602	0.0430504	1.51725	A0A0R0ELP2	Lipase_GDSL domain-containing protein	17	4	43.7	8.6	at3g26430	26.28	misc.GDSL-motif lipase
+	2.25516	0.00555702	1.50245	I1NFP9	PB1 domain-containing protein	19	6	78.2	6.3	at2g01190	35.1	not assigned.no ontology
+	2.18732	0.00649647	1.49695	C6SW77	Uncharacterized protein	34	5	25.8	9.69	at1g01820	31.1	cell.organisation
+	2.34726	0.00449513	1.48764	I1K964	Proteasome subunit beta (EC 3.4.25.1)	78	11	25.1	5.55	at4g31300	29.5.11.20	protein.degradation.ubiquitin.proteasom
+	2.08962	0.00813544	1.48099	I1NA37	Uncharacterized protein	35	4	21	6.93	at5g02770	35.2	not assigned.unknown
+	1.65347	0.0222089	1.47805	A0A0R0GAQ3	WD_REPEATS_REGION domain-containing protein	18	5	52.5	8.91	at4g15900	30.1.1	signalling.in sugar and nutrient physiology
+	2.04936	0.0089256	1.47097	A0A368UH26	Uncharacterized protein	17	2	21.8	6.01	at5g57000	35.2	not assigned.unknown
+	1.55464	0.0278846	1.46956	I1JET8	Uncharacterized protein	6	2	56.9	6.48	at3g19280	29.7.10	protein.glycosylation.alpha-1,3-fucosyltransferase(alpha-1,3-FucT)
+	1.80518	0.0156609	1.4681	I1N7K5	UBX domain-containing protein	20	2	29.1	7.18	at3g27310	35.2	not assigned.unknown
+	1.38175	0.0415189	1.45806	Q9SWB2	Seed maturation protein PM41	31	2	8.2	4.97	at2g21820	35.2	not assigned.unknown
+	1.87137	0.0134472	1.45757	C6TN05	Hypersensitive induced reaction protein 4	12	2	32.6	5.31	at5g51570	35.1	not assigned.no ontology
+	4.42428	3.76462e-05	1.44189	Q9XET0	Seed maturation protein PM30	30	4	15.1	8.9	at1g52690	33.2	development.late embryogenesis abundant
+	2.12309	0.00753196	1.43303	A0A0R0J2N5	Uncharacterized protein	10	2	29.7	6.73	at2g19570	23.2	nucleotide metabolism.degradation
+	1.63801	0.0230139	1.43211	I1MGH2	Fn3_like domain-containing protein	13	7	84	8.15	at5g49360	10.6.2	cell wall.degradation.mannan-xylose-arabinose-fucose
+	1.8536	0.0140089	1.43209	A0A0R0F259	Uncharacterized protein	41	14	65.2	6.21	at5g54960	5.2	fermentation.PDC
+	1.58143	0.0262165	1.41659	A0A0R0EPA1	Uncharacterized protein	16	2	30.5	9.09	at3g53420	34.19.1	transport.Major Intrinsic Proteins.PIP
+	3.39648	0.000401343	1.39631	I1JU00	SHSP domain-containing protein	15	2	17.9	7.18	at5g12020	20.2.1	stress.abiotic.heat
+	3.22259	0.000598974	1.37552	I1L8X8	DUF5311 domain-containing protein	2	2	169.3	5.87	at1g33410	35.2	not assigned.unknown
+	2.64504	0.00226441	1.36806	A0A0R4J2Q1	Peptidase A1 domain-containing protein	27	8	46.4	8.34	at1g03220	29.5.4	protein.degradation.aspartate protease
+	4.26905	5.38209e-05	1.36507	A0A0R0JL19	Uncharacterized protein	70	17	41	6.4	at1g77120	5.3	fermentation.ADH
+	3.27732	0.000528053	1.3623	I1JLC8	Protein SLE2 (Em protein) (Protein Glycine max physiologically mature 11) (Protein GmD-19) (Soybean group-1 late embryogenesis abundant protein 2) (Soybean group-1 lea protein 2) (Sle2)	35	3	11.5	5.6	at2g40170	17.1.3	hormone metabolism.abscisic acid.induced-regulated-responsive-activated
+	2.69698	0.00200918	1.35264	I1MUR0	UBX domain-containing protein	20	8	65.5	4.73	at4g11740	31.4	cell.vesicle transport
+	2.14495	0.00716228	1.32328	I1MX00	Protein kinase domain-containing protein	9	4	75.5	6.42	at5g10530	30.2.19	signalling.receptor kinases.legume-lectin
+	1.92928	0.0117684	1.31994	I1J7T0	Pectinesterase (EC 3.1.1.11)	20	7	56.5	9.01	at2g45220	10.8.99	cell wall.pectin*esterases.misc
+	4.31653	4.8247e-05	1.31732	K7MNN1	Aminotran_1_2 domain-containing protein	12	3	52.8	7.94	at4g36480	11.8.1	lipid metabolism.''exotics'' (steroids, squalene etc).sphingolipids
+	3.50772	0.000310655	1.30104	I1J4D5	Uncharacterized protein	41	6	26.6	5.9	at4g26220	16.2.1.6	secondary metabolism.phenylpropanoids.lignin biosynthesis.CCoAOMT
+	1.98322	0.0103938	1.2938	I1M3A7	Uncharacterized protein	12	3	63.8	5.73	at3g15410	35.1	not assigned.no ontology
+	1.43728	0.0365362	1.29326	I1JAV9	Pectinesterase (EC 3.1.1.11)	36	13	61	8.59	at1g11580	10.8.1	cell wall.pectin*esterases.PME
+	2.27828	0.00526888	1.28376	Q8LGT8	Phosphoglycerate mutase-like protein	20	4	31.8	6.34	at5g64460	35.2	not assigned.unknown
+	2.66757	0.00214998	1.27382	I1KQB7	Uncharacterized protein	10	9	162.8	5.99	at1g14850	29.3.1	protein.targeting.nucleus
+	2.22791	0.00591678	1.2567	I1M307	Bulb-type lectin domain-containing protein	19	7	48.8	6.64	at1g78850	26.16	misc.myrosinases-lectin-jacalin
+	1.38082	0.0416082	1.25075	K7LLK0	Uncharacterized protein	19	9	88.2	5.15	at1g14650	27.1	RNA.processing
+	1.32938	0.0468399	1.24986	I1L5Z2	Aldose 1-epimerase (EC 5.1.3.3) (Galactose mutarotase)	28	6	40.7	9.32	at5g15140	3.5	minor CHO metabolism.others
+	1.30397	0.0496624	1.2483	I1KSE3	ALOG domain-containing protein	20	2	18.8	9.88	at2g42610	35.2	not assigned.unknown
+	2.97924	0.00104897	1.24604	I1KG22	Uncharacterized protein	10	4	84.8	5.94	at1g16780	34.3	transport.H+ transporting pyrophosphatase
+	1.63867	0.022979	1.24472	I1MJC0	Protein kinase domain-containing protein	3	2	139.5	5.21	at1g79570	29.4	protein.postranslational modification
+	3.90551	0.000124305	1.23974	I1MKC8	Starch synthase, chloroplastic/amyloplastic (EC 2.4.1.-)	26	10	68.1	7.06	at1g32900	2.1.2.2	major CHO metabolism.synthesis.starch.starch synthase
+	1.6763	0.0210716	1.23767	A0A0R0L1W4	Glycosyltransferase (EC 2.4.1.-)	16	5	56.7	6.58	at5g12890	26.2	misc.UDP glucosyl and glucoronyl transferases
+	2.46581	0.00342126	1.22391	K7LM54	Rab-GAP TBC domain-containing protein	15	8	93.2	4.83	at3g55020	30.5	signalling.G-proteins
+	2.08119	0.00829485	1.22192	I1M3D5	Arf-GAP domain-containing protein	12	4	52.3	8.43	at5g54310	27.3.99	RNA.regulation of transcription.unclassified
+	1.50912	0.030966	1.21386	A0A0R0ESZ7	Uncharacterized protein	19	2	19.6	4.65	at5g14910	35.1	not assigned.no ontology
+	2.03787	0.00916489	1.21263	I1LKD9	Protein transport protein Sec61 subunit beta	41	4	10.9	11.65	at5g60460	29.3.4.99	protein.targeting.secretory pathway.unspecified
+	1.97342	0.0106311	1.20922	C6TFE2	Uncharacterized protein	26	3	22.6	8.95	at1g70680	33.99	development.unspecified
+	2.30068	0.00500407	1.20903	C6T9H6	Uncharacterized protein	26	5	42.3	7.56	at2g40660	29.1	protein.aa activation
+	1.90994	0.0123043	1.20518	K7MP42	Ubiquitin-like domain-containing protein	14	9	98.7	5.43	at5g42220	29.2.3	protein.synthesis.initiation
+	2.91431	0.00121813	1.20488	I1M2S7	Lactamase_B domain-containing protein	47	15	41.4	8.72	at1g53580	24.1	Biodegradation of Xenobiotics.hydroxyacylglutathione hydrolase
+	3.97354	0.000106282	1.2037	A0A0R0ICF9	Pectinesterase (EC 3.1.1.11)	20	2	35.4	6.34	at3g29090	10.8.1	cell wall.pectin*esterases.PME
+	3.61491	0.000242712	1.19806	I1MPF6	Uncharacterized protein	31	7	40.4	5.27	at4g11260	29.4	protein.postranslational modification
+	2.75813	0.0017453	1.19505	I1MVM6	Protein kinase domain-containing protein	20	5	40.6	8.66	at2g23070	29.4	protein.postranslational modification
+	2.4247	0.00376095	1.18161	I1K072	Uncharacterized protein	33	16	77.3	5.14	at5g63190	28.99	DNA.unspecified
+	1.64932	0.0224221	1.1815	O23959	Ca+2-binding EF hand protein	23	4	27	6.44	at4g26740	33.99	development.unspecified
+	3.6034	0.000249232	1.18138	Q9MAZ9	Nonclathrin coat protein zeta1-COP	46	4	20.1	4.86	at1g60970	29.3.4.99	protein.targeting.secretory pathway.unspecified
+	3.15537	0.00069924	1.17508	I1N3Y0	Uncharacterized protein	15	4	46.1	7.05	at1g65320	35.1	not assigned.no ontology
+	2.63707	0.00230637	1.17465	I1KMS6	Uncharacterized protein	28	4	19	7.5	at4g16160	29.3.2	protein.targeting.mitochondria
+	1.46213	0.0345038	1.17434	I1L437	PHB domain-containing protein	46	9	31.8	9.72	at1g03860	31.3	cell.cycle
+	3.01793	0.000959545	1.17355	I1L0W9	Uncharacterized protein	18	9	85.2	8.13	at3g06810	11.9.4.2	lipid metabolism.lipid degradation.beta-oxidation.acyl CoA DH
+	1.8692	0.0135144	1.17255	A0A0R0FSB9	Uncharacterized protein (Fragment)	49	2	11.2	9.2	at4g31830	35.2	not assigned.unknown
+	1.66076	0.0218393	1.17134	K7KSA3	Uncharacterized protein	3	2	119.9	6.46	at5g06120	30.5	signalling.G-proteins
+	4.20277	6.26951e-05	1.17037	I1MYR9	Uncharacterized protein	24	3	20	10.36	at4g39880	29.2.1.99.2.23	protein.synthesis.ribosomal protein.unknown.large subunit.L23
+	1.48573	0.0326789	1.16612	I1J8U0	Uncharacterized protein	16	4	45.6	6.37	at5g48330	31.2	cell.division
+	1.63907	0.0229577	1.16595	I1MJS7	RRM domain-containing protein	2	2	97.5	6.35	at4g24270	27.4	RNA.RNA binding
+	2.11639	0.00764907	1.16523	Q2PMQ3	DNA-directed RNA polymerase subunit alpha (PEP) (EC 2.7.7.6) (Plastid-encoded RNA polymerase subunit alpha) (RNA polymerase subunit alpha)	20	4	38.7	7.56	atcg00740	27.2	RNA.transcription
+	3.92642	0.000118462	1.15791	C6T3U6	Ribosomal protein L19	17	2	24.8	11.44	at3g16780	29.2.1.2.2.19	protein.synthesis.ribosomal protein.eukaryotic.60S subunit.L19
+	2.16001	0.00691816	1.14667	A0A0R0JWL2	Uncharacterized protein	45	4	21.2	8.47	at2g45180	26.21	misc.protease inhibitor/seed storage/lipid transfer protein (LTP) family protein
+	3.10836	0.000779189	1.13658	I1LLG6	Uncharacterized protein	5	4	179.7	6.14	at5g13530	29.4	protein.postranslational modification
+	1.7406	0.0181719	1.13201	K7MZI8	Pectinesterase (EC 3.1.1.11)	24	9	67.9	8.4	at4g02300	10.8.99	cell wall.pectin*esterases.misc
+	6.06395	8.63081e-07	1.13077	I1KTY1	Protein kinase domain-containing protein	4	3	138	5.81	at1g79570	29.4	protein.postranslational modification
+	1.43776	0.0364957	1.13036	A8IFI1	S1 ribosomal protein	24	3	23.4	10.27	unknown	unknown	unknown
+	3.3285	0.000469359	1.12455	A0A0R0GZ36	Uncharacterized protein	48	9	41.3	5.99	at1g15330	35.1	not assigned.no ontology
+	2.28606	0.00517531	1.12007	I1LSH5	Uncharacterized protein	6	2	44.7	9.64	at2g42710	29.2.1.1.3.2.1	protein.synthesis.ribosomal protein.prokaryotic.unknown organellar.50S subunit.L1
+	1.80084	0.0158185	1.11571	I1LJ29	Uncharacterized protein	25	4	27.1	6.8	at1g08530	35.2	not assigned.unknown
+	2.14855	0.0071032	1.111	A0A0R0I3N7	WD_REPEATS_REGION domain-containing protein	17	5	52.6	8.94	at4g15900	30.1.1	signalling.in sugar and nutrient physiology
+	1.64235	0.022785	1.10244	I1JV82	TPR_REGION domain-containing protein	32	4	24.1	8.7	at5g65520	35.2	not assigned.unknown
+	2.34727	0.00449504	1.1016	I1LJA4	Nop domain-containing protein	29	10	60.8	9.03	at5g27120	27.3.67	RNA.regulation of transcription.putative transcription regulator
+	1.80955	0.0155042	1.10143	I1MKY3	Uncharacterized protein	40	4	12.6	6.74	unknown	unknown	unknown
+	1.61141	0.0244677	1.1014	I1LUJ6	PHB domain-containing protein	47	10	37.1	9.63	at1g03860	31.3	cell.cycle
+	3.0296	0.000934105	1.10104	K7MIR3	Enolase_C domain-containing protein	67	15	38.3	6.8	at2g36530	4.1.14	glycolysis.cytosolic branch.enolase
+	3.36437	0.000432146	1.09965	A0A0R0E8N5	Uricase (EC 1.7.3.3) (Urate oxidase)	62	15	35.1	8.29	at2g26230	23.2	nucleotide metabolism.degradation
+	2.10856	0.00778823	1.09118	I1NAS0	EF-hand domain-containing protein	9	3	47.3	5.49	at5g06260	28.1	DNA.synthesis/chromatin structure
+	4.39133	4.06132e-05	1.08956	I1JQI7	Thioredox_DsbH domain-containing protein	12	6	90.9	6.43	at4g03200	35.2	not assigned.unknown
+	2.02385	0.0094657	1.08522	I1NEU8	Aminotran_5 domain-containing protein	23	6	49.5	7.31	at5g26600	35.1	not assigned.no ontology
+	1.92243	0.0119555	1.08416	K7MR36	Citrate synthase (EC 2.3.3.16)	30	9	56.6	9.38	at3g58750	6.1	gluconeogenese/ glyoxylate cycle.citrate synthase
+	3.3878	0.000409448	1.0778	A0A0R0F5Y7	WD_REPEATS_REGION domain-containing protein	18	14	121.9	5.52	at3g13300	27.1	RNA.processing
+	1.46459	0.0343092	1.07591	I1KW20	PHB domain-containing protein	35	7	30.5	8.35	at5g40770	31.2	cell.division
+	2.8314	0.00147436	1.06828	I1LP93	Phospholipid scramblase	12	3	40.2	9.57	at2g04940	35.1	not assigned.no ontology
+	3.83758	0.000145351	1.06825	Q8W198	Phosphate transporter	36	12	36.3	9.04	at5g14040	34.9	transport.metabolite transporters at the mitochondrial membrane
+	3.04614	0.000899198	1.06436	K7MQ23	Uncharacterized protein	12	5	62.2	6.99	at1g55150	17.5.3	hormone metabolism.ethylene.induced-regulated-responsive-activated
+	3.21743	0.000606142	1.05435	I1L957	Uncharacterized protein	33	11	48.8	6.42	at2g36640	33.2	development.late embryogenesis abundant
+	1.81976	0.0151439	1.05246	A0A0A8WHK7	Expansin	25	4	27.5	8.84	at1g20190	10.7	cell wall.modification
+	2.73642	0.00183477	1.05193	A0A0R4J2T3	Uncharacterized protein	40	14	65.3	5.25	at5g55230	31.1	cell.organisation
+	3.19785	0.000634096	1.04771	C6T9B1	cobW domain-containing protein	53	9	31.4	6.48	at2g34470	13.2.2.3	amino acid metabolism.degradation.glutamate family.arginine
+	1.40526	0.0393311	1.04741	I1J9W3	J domain-containing protein	4	2	59.9	9.09	at2g35720	20.2.1	stress.abiotic.heat
+	1.32823	0.0469649	1.04587	K7L3H1	Uncharacterized protein	11	3	47.7	9.85	at5g62050	34.13	transport.peptides and oligopeptides
+	1.62774	0.0235646	1.04394	A0A0R0HN41	Uncharacterized protein (Fragment)	61	4	12	4.46	at4g15802	35.2	not assigned.unknown
+	1.92226	0.0119602	1.04313	Q948P5	Ferritin-4, chloroplastic (EC 1.16.3.1) (SFerH-4)	46	9	27.5	5.96	at2g40300	15.2	metal handling.binding, chelation and storage
+	3.16042	0.000691159	1.04129	I1KDR0	Uncharacterized protein	64	16	57.1	5.39	at3g15180	29.5.11.20	protein.degradation.ubiquitin.proteasom
+	2.27089	0.00535927	1.03669	C6TMZ4	Fe2OG dioxygenase domain-containing protein	30	5	36	5.38	at1g05010	17.5.1.2	hormone metabolism.ethylene.synthesis-degradation.1-aminocyclopropane-1-carboxylate oxidase
+	2.46309	0.00344281	1.03591	K7M9T4	PUA domain-containing protein	8	2	66.2	9.25	at3g57150	28.1	DNA.synthesis/chromatin structure
+	2.10289	0.00789067	1.03227	I1MDA0	Uncharacterized protein	19	2	17.1	10.17	at5g52370	35.2	not assigned.unknown
+	3.00169	0.000996117	1.03043	I1KYL4	ER membrane protein complex subunit 3	26	5	27.8	8.97	at4g12590	35.2	not assigned.unknown
+	1.78964	0.0162316	1.02944	I1KW16	Uncharacterized protein	42	3	9.3	9.16	at4g00860	20	stress
+	2.62113	0.00239263	1.02759	I1LLT9	Uncharacterized protein	13	3	49.2	8.78	at1g16870	29.2.1.1.2.1.29	protein.synthesis.ribosomal protein.prokaryotic.mitochondrion.30S subunit.S29
+	3.25066	0.000561484	1.02418	C6T321	Clat_adaptor_s domain-containing protein	21	2	19.7	4.86	at3g09800	29.3.4.99	protein.targeting.secretory pathway.unspecified
+	2.58339	0.00260983	1.01453	C6SWV4	Uncharacterized protein	40	5	18.8	6.32	at4g16160	29.3.2	protein.targeting.mitochondria
+	2.38092	0.00415989	1.01426	I1JA23	Phospholipase D (EC 3.1.4.4)	4	3	96	7.75	at2g42010	11.9.3.1	lipid metabolism.lipid degradation.lysophospholipases.phospholipase D
+	1.31661	0.0482384	1.01198	I1M099	Uncharacterized protein	16	4	31.4	9.67	at2g34700	20.2.99	stress.abiotic.unspecified
+	2.97967	0.00104793	1.0089	I1LS05	Uncharacterized protein	34	7	45.8	7.02	at2g20770	35.1	not assigned.no ontology
+	1.83783	0.0145269	1.00605	I1KQG0	T-complex protein 1 subunit delta	66	22	57.6	7.28	at3g18190	29.6	protein.folding
+	2.10861	0.00778739	1.00352	K7KBB0	Phi class glutathione S-transferase	39	6	24.8	6.3	at2g30860	26.9	misc.glutathione S transferases
+	1.55896	0.0276084	1.00234	I1J626	Uncharacterized protein	4	2	73.1	7.87	at5g13210	35.2	not assigned.unknown
+	3.39631	0.000401507	1.00072	I1LDP2	Uncharacterized protein	16	4	27.9	8.92	at5g52420	35.2	not assigned.unknown
+	1.32821	0.0469663	0.999479	A0A0R0EXK4	Uncharacterized protein	15	7	70.7	8.37	at3g23300	20.2.3	stress.abiotic.drought/salt
+	1.50536	0.0312351	0.998408	I1LPA6	Uncharacterized protein	12	4	38.8	8.31	at5g12470	35.2	not assigned.unknown
+	2.08419	0.00823784	0.995188	I1JSN6	Usp domain-containing protein	24	2	19.9	6.33	at2g21620	20.2.99	stress.abiotic.unspecified
+	2.86417	0.00136719	0.98421	I1KX25	Arf-GAP domain-containing protein	47	11	43.4	8.92	at4g17890	29.5.11.5	protein.degradation.ubiquitin.ubiquitin protease
+	2.32578	0.00472303	0.981839	I1MY43	Vacuolar protein sorting-associated protein 35	15	7	90.3	5.43	at1g75850	29.3.4.3	protein.targeting.secretory pathway.vacuole
+	1.75567	0.0175523	0.979964	I1LSS9	Flavodoxin-like domain-containing protein	37	5	21.8	5.57	at5g54500	11.8	lipid metabolism.''exotics'' (steroids, squalene etc)
+	2.50313	0.00313959	0.979738	I1LTF0	Uncharacterized protein	14	3	51.8	8.78	at4g20020	35.2	not assigned.unknown
+	3.94526	0.000113434	0.979574	C6SZK3	Glutathione peroxidase	44	5	18.4	7.09	at4g11600	21.2.2	redox.ascorbate and glutathione.glutathione
+	2.79124	0.00161717	0.979124	I1JXA0	Uncharacterized protein	54	33	90.8	5.24	at5g03340	31.2	cell.division
+	3.28255	0.00052173	0.978396	I1NHP3	Uncharacterized protein	25	2	15.6	9.09	at3g52230	35.2	not assigned.unknown
+	1.98636	0.010319	0.977542	K7MVR5	Methionine aminopeptidase 2 (MAP 2) (MetAP 2) (EC 3.4.11.18) (Peptidase M)	16	3	48.2	6.48	at3g59990	29.5.7	protein.degradation.metalloprotease
+	1.87776	0.0132508	0.977516	I1KCD7	Uncharacterized protein	40	26	90.9	5.24	at5g03340	31.2	cell.division
+	2.70482	0.00197326	0.975772	Q39834	Clathrin heavy chain	45	55	193.2	5.55	at3g11130	31.4	cell.vesicle transport
+	2.9798	0.00104761	0.975322	I1N5N0	Pyruvate kinase (EC 2.7.1.40)	55	19	55.2	7.56	at5g08570	4.1.15	glycolysis.cytosolic branch.pyruvate kinase (PK)
+	2.03984	0.00912342	0.974591	I1LR42	Uncharacterized protein	5	3	93.8	4.59	at1g07990	26.13	misc.acid and other phosphatases
+	1.83481	0.0146283	0.965885	I1LUW6	Arf-GAP domain-containing protein	7	3	52.5	8.43	at5g54310	27.3.99	RNA.regulation of transcription.unclassified
+	4.6472	2.25318e-05	0.963471	I1LN49	Uncharacterized protein	50	8	27	7.06	at1g05510	35.2	not assigned.unknown
+	2.10411	0.00786855	0.963429	I1JH91	Uncharacterized protein	5	2	92.3	6.65	at3g07660	35.2	not assigned.unknown
+	1.97526	0.0105861	0.958988	I1KWA0	Uncharacterized protein	39	16	65.2	4.83	at1g72160	34.99	transport.misc
+	2.27742	0.00527934	0.958033	I1NC18	Glutathione synthetase (GSH-S) (EC 6.3.2.3)	37	13	60.8	7.28	at5g27380	21.2.2	redox.ascorbate and glutathione.glutathione
+	1.58659	0.0259065	0.954821	I1MBI9	Peroxidase (EC 1.11.1.7)	26	7	40	9.54	at5g05340	26.12	misc.peroxidases
+	1.39916	0.0398881	0.951627	A0A0R0EEE4	HMA domain-containing protein	32	3	13.6	7.72	at1g66240	15.2	metal handling.binding, chelation and storage
+	2.32973	0.00468029	0.951485	I1K0C8	UBX domain-containing protein	26	9	65.7	4.73	at4g11740	31.4	cell.vesicle transport
+	2.7544	0.00176036	0.949251	K7LQ69	Poly [ADP-ribose] polymerase (PARP) (EC 2.4.2.-)	38	20	91.1	5.43	at5g22470	29.4	protein.postranslational modification
+	2.50211	0.00314694	0.946915	A0A368UH41	TOG domain-containing protein	14	9	118.8	6.76	at5g64270	27.1.1	RNA.processing.splicing
+	1.56814	0.0270309	0.943257	I1JLY3	Peptidylprolyl isomerase (EC 5.2.1.8)	17	7	69.9	5.53	at3g54010	31.3.1	cell.cycle.peptidylprolyl isomerase
+	1.72074	0.0190222	0.938893	I1JJC9	Uncharacterized protein	5	2	61.6	8.07	at3g20290	30.3	signalling.calcium
+	2.92793	0.0011805	0.93844	A0A0R0G0T0	PfkB domain-containing protein	33	9	37.9	5.63	at5g51830	2.2.1.1	major CHO metabolism.degradation.sucrose.fructokinase
+	2.06212	0.00866726	0.931099	I1LPC3	Uncharacterized protein	28	21	134.7	6.58	at4g10320	29.1.5	protein.aa activation.isoleucine-tRNA ligase
+	2.24419	0.00569916	0.929358	I1JUR9	Uncharacterized protein	8	2	37.8	8.78	at2g03120	29.5	protein.degradation
+	1.8317	0.0147334	0.920705	I1JYF7	PHB domain-containing protein	43	12	43.9	9.11	at4g27585	35.1	not assigned.no ontology
+	1.62813	0.0235432	0.916053	I1KLY3	Abhydrolase_3 domain-containing protein	11	2	35	5.76	at1g47480	11.9.3.2	lipid metabolism.lipid degradation.lysophospholipases.carboxylesterase
+	2.59499	0.00254101	0.904846	Q84ZV2	Uncharacterized protein	33	2	11.3	9.13	at1g55805	35.1	not assigned.no ontology
+	1.3643	0.0432216	0.904034	I1LNJ4	SAM_MT_RSMB_NOP domain-containing protein	3	2	91.5	6.1	at2g22400	35.1	not assigned.no ontology
+	2.23473	0.00582459	0.900038	Q39801	51 kDa seed maturation protein	25	10	51	7.11	at3g53040	33.2	development.late embryogenesis abundant
+	2.39128	0.00406181	0.8976	K7LRE0	Uncharacterized protein	24	4	10.3	5.21	at5g04800	29.2.1.2.1.17	protein.synthesis.ribosomal protein.eukaryotic.40S subunit.S17
+	1.81899	0.0151708	0.896707	B6CAM2	Matrix metalloproteinase	17	5	44	5.86	at1g59970	29.5.7	protein.degradation.metalloprotease
+	1.89116	0.0128481	0.8937	I1MK76	Pectinesterase (EC 3.1.1.11)	20	7	54.7	7.75	at3g14310	10.8.1	cell wall.pectin*esterases.PME
+	2.24117	0.00573897	0.888155	I1LGL4	Uncharacterized protein	26	6	45.1	7.2	at4g12130	35.1	not assigned.no ontology
+	2.2024	0.0062748	0.886804	I1K4P5	Uncharacterized protein	10	2	40.2	5.45	at5g10010	35.2	not assigned.unknown
+	1.36771	0.0428833	0.879011	I1MBD1	Clathrin heavy chain	37	43	192.7	5.36	at3g11130	31.4	cell.vesicle transport
+	3.33902	0.000458116	0.876516	A0A0R0JRB0	L-lactate dehydrogenase (EC 1.1.1.27)	51	10	37.8	7.02	at4g17260	5.1	fermentation.LDH
+	1.70008	0.0199489	0.874358	K7LRS0	Bac_surface_Ag domain-containing protein	9	3	59.1	5.52	at5g05520	35.1	not assigned.no ontology
+	3.07794	0.000835728	0.87365	I1M0K3	Cysteine proteinase inhibitor	50	9	27.7	7.08	at3g12490	29.5.3	protein.degradation.cysteine protease
+	1.85842	0.0138541	0.87283	I1LGI3	RanBD1 domain-containing protein	8	2	39.1	7.18	at4g11790	35.1	not assigned.no ontology
+	1.48629	0.0326368	0.870516	I1KJ35	Uncharacterized protein	27	11	58.7	8.97	at3g18080	26.3	misc.gluco-, galacto- and mannosidases
+	3.03399	0.000924725	0.869869	C6SWI0	Thioredoxin domain-containing protein	16	3	26.1	5.29	at5g66410	21.1	redox.thioredoxin
+	2.47836	0.00332381	0.86587	I1L0S5	Uncharacterized protein	40	5	19	6.93	at4g16160	29.3.2	protein.targeting.mitochondria
+	1.49139	0.0322562	0.863468	I1MMG2	Uncharacterized protein	20	5	40.8	5.92	at1g47128	29.5.3	protein.degradation.cysteine protease
+	1.37015	0.0426432	0.863245	C6SZ12	U6 snRNA-associated Sm-like protein LSm1	27	2	14.5	5.07	at3g14080	27.1	RNA.processing
+	1.95191	0.011171	0.863211	Q39871	Late embryongenesis abundant protein	25	9	50.6	6.67	at2g36640	33.2	development.late embryogenesis abundant
+	1.52756	0.0296786	0.860622	C6SZ11	Uncharacterized protein	46	7	27	6.92	at1g05510	35.2	not assigned.unknown
+	4.06348	8.64003e-05	0.859297	I1J7C8	Peptidase_M24 domain-containing protein	44	11	42.9	6.76	at3g51800	29.5	protein.degradation
+	1.72182	0.0189748	0.858524	I1LG74	NAD(P)-bd_dom domain-containing protein	16	5	42.7	7.28	at4g10960	10.1.2	cell wall.precursor synthesis.UGE
+	1.48053	0.033073	0.858452	C6T294	zf-Tim10_DDP domain-containing protein	51	4	10.9	7.21	at3g46560	29.3.2	protein.targeting.mitochondria
+	1.52462	0.0298799	0.857843	I1MMH5	Pectin acetylesterase (EC 3.1.1.-)	50	15	45.8	8.32	at4g19420	10.8.2	cell wall.pectin*esterases.acetyl esterase
+	3.05457	0.000881924	0.857512	K7LJP8	Uncharacterized protein	11	9	182.3	6.24	at5g27970	35.2	not assigned.unknown
+	3.92932	0.000117674	0.85626	C6SWV3	Uncharacterized protein	66	11	27.6	6.1	at5g45690	35.2	not assigned.unknown
+	2.52874	0.00295978	0.855128	A1YZE0	Starch synthase, chloroplastic/amyloplastic (EC 2.4.1.-)	24	9	68	7.06	at1g32900	2.1.2.2	major CHO metabolism.synthesis.starch.starch synthase
+	4.12575	7.48608e-05	0.853451	C6T1E1	t-SNARE coiled-coil homology domain-containing protein	44	4	14.4	5.9	at3g58170	29.3.4.2	protein.targeting.secretory pathway.golgi
+	1.47199	0.0337293	0.851152	I1KIT0	Uncharacterized protein	12	2	53.9	6.46	at3g24480	10.5.3	cell wall.cell wall proteins.LRR
+	1.53507	0.0291695	0.848807	I1M222	Uncharacterized protein	29	6	25.6	5.68	at4g21020	35.1.22	not assigned.no ontology.late embryogenesis abundant domain-containing protein
+	1.35182	0.0444815	0.844898	A0A0R0IJV1	Uncharacterized protein	26	7	36.9	8.27	at3g08640	35.1	not assigned.no ontology
+	2.59473	0.00254253	0.841306	I1LBM1	Uncharacterized protein	10	3	57.9	9.17	at5g60960	35.1.5	not assigned.no ontology.pentatricopeptide (PPR) repeat-containing protein
+	1.33783	0.0459379	0.840614	I1M8R6	WPP domain-containing protein	22	2	13.1	4.6	at5g43070	31.2	cell.division
+	1.7124	0.0193909	0.839499	B1ACD0	Kunitz trypsin inhibitor p20-1-like protein	25	3	22.7	5.58	at1g17860	20.1.7.6.1	stress.biotic.PR-proteins.proteinase inhibitors.trypsin inhibitor
+	3.72542	0.000188183	0.837554	C6T2S4	Uncharacterized protein	55	7	22.2	7.47	at4g02080	30.5	signalling.G-proteins
+	2.25843	0.00551535	0.836888	K7MQM3	C2 domain-containing protein	26	8	46.5	4.67	at5g55530	20.2.2	stress.abiotic.cold
+	2.16232	0.00688142	0.836667	I1JUR5	S5 DRBM domain-containing protein	14	4	57.1	6.7	at1g64880	29.2.1.1.3.1.5	protein.synthesis.ribosomal protein.prokaryotic.unknown organellar.30S subunit.S5
+	2.69539	0.00201655	0.836532	K7KZN7	Uncharacterized protein	16	13	129.9	7.96	at3g14310	10.8.1	cell wall.pectin*esterases.PME
+	1.79627	0.0159856	0.835269	Q39873	Lea protein	22	8	49.4	7.52	at2g18340	35.1.22	not assigned.no ontology.late embryogenesis abundant domain-containing protein
+	1.81321	0.015374	0.83398	I1KEY3	J domain-containing protein	19	4	38.4	9.04	at2g20560	20.2.1	stress.abiotic.heat
+	2.17849	0.00663001	0.82918	I1KV60	RuvB-like helicase (EC 3.6.4.12)	22	6	50.2	5.82	at5g22330	33.99	development.unspecified
+	2.51036	0.00308775	0.828908	C6T9Z5	Formate dehydrogenase, mitochondrial (FDH) (EC 1.17.1.9) (NAD-dependent formate dehydrogenase)	58	15	42.8	6.77	at5g14780	25.1	C1-metabolism.formate dehydrogenase
+	2.10398	0.00787084	0.828294	I1LQR8	Uncharacterized protein	34	5	26.2	7.85	at2g28790	20.2	stress.abiotic
+	1.62026	0.0239738	0.827274	I1K1V3	Uncharacterized protein	16	2	17.3	5.3	at3g22480	29.6	protein.folding
+	1.4196	0.0380539	0.825116	I1LF85	RING-type domain-containing protein	14	2	31.8	4.75	at3g19950	29.5.11.4.2	protein.degradation.ubiquitin.E3.RING
+	2.29617	0.00505628	0.824737	I1JAU2	Uncharacterized protein	25	9	62	5.68	at2g32120	20.2.1	stress.abiotic.heat
+	2.23308	0.00584684	0.822119	I1MU56	Uncharacterized protein	24	11	82.2	6.25	at5g20250	3.1.2.2	minor CHO metabolism.raffinose family.raffinose synthases.putative
+	1.6002	0.0251073	0.817212	I1M860	TOG domain-containing protein	16	4	37.8	5.31	at5g14790	35.2	not assigned.unknown
+	3.28533	0.000518403	0.815091	I1N610	Uncharacterized protein	16	4	35.5	6.05	at3g28480	26.7	misc.oxidases - copper, flavone etc.
+	2.10475	0.00785681	0.814351	C6T199	zf-Tim10_DDP domain-containing protein	39	2	9.7	6.01	at2g29530	29.3.2	protein.targeting.mitochondria
+	2.92816	0.00117987	0.813588	C6SZR4	Uncharacterized protein (Fragment)	35	6	28.2	6.42	at2g29420	26.9	misc.glutathione S transferases
+	1.79597	0.0159969	0.812754	I1L7W8	Phi class glutathione S-transferase	34	4	24.7	5.44	at3g62760	26.9	misc.glutathione S transferases
	1.34965	0.0447042	0.811513	K7LPS4	NOT2_3_5 domain-containing protein	10	3	70	7.64	at1g07705	35.1	not assigned.no ontology
+	2.83078	0.00147645	0.806772	I1MYV2	SAP domain-containing protein	14	6	78	4.74	at4g39680	27.3.67	RNA.regulation of transcription.putative transcription regulator
+	2.40055	0.00397602	0.80502	I1MUN3	Nop domain-containing protein	33	13	61.1	8.43	at1g56110	27.3.67	RNA.regulation of transcription.putative transcription regulator
+	1.50968	0.030926	0.803223	K7MXK9	Hydrolase_4 domain-containing protein	13	4	77.3	7.94	at5g41130	35.1	not assigned.no ontology
+	1.65177	0.022296	0.800659	C6T244	Uncharacterized protein	30	2	14	5.17	at1g78190	35.2	not assigned.unknown
+	2.47472	0.0033518	0.799402	K7K2H1	Nsp1_C domain-containing protein	5	2	74.1	4.77	at2g45000	35.2	not assigned.unknown
+	1.91003	0.012302	0.79876	C6T1X7	Uncharacterized protein	38	2	12.5	9.92	at5g25940	33.99	development.unspecified
+	2.84646	0.00142411	0.797323	I1K811	Uncharacterized protein	13	4	51.3	6.52	at5g42830	16.2	secondary metabolism.phenylpropanoids
+	1.97772	0.0105263	0.796448	I1MAX9	SAICAR_synt domain-containing protein	17	4	46	6.28	at3g21110	23.1.2.7	nucleotide metabolism.synthesis.purine.SAICAR synthetase
+	1.64775	0.0225037	0.794455	C6SW70	Uncharacterized protein	42	11	28.2	9.88	at3g13580	29.2.1.2.2.7	protein.synthesis.ribosomal protein.eukaryotic.60S subunit.L7
+	1.87705	0.0132726	0.793912	K7K780	Uncharacterized protein	11	9	132.9	5.31	at5g16210	35.2	not assigned.unknown
+	2.50484	0.00312726	0.79299	I1M7N8	Uncharacterized protein	20	5	32.7	4.96	at3g56190	29.3.4.99	protein.targeting.secretory pathway.unspecified
+	2.47389	0.00335827	0.792285	I1M984	AA_TRNA_LIGASE_II domain-containing protein	45	19	60.2	6.1	at4g31180	29.1.12	protein.aa activation.aspartate-tRNA ligase
+	3.64461	0.000226668	0.792017	I1JS10	Uncharacterized protein	86	2	6.8	8.92	at2g46540	35.2	not assigned.unknown
+	2.22634	0.00593827	0.791678	C6T078	Uncharacterized protein	18	2	14.3	10.83	at5g02610	29.2.1.2.2.35	protein.synthesis.ribosomal protein.eukaryotic.60S subunit.L35
+	2.07645	0.00838589	0.791047	I1JZT5	Plasma membrane ATPase (EC 7.1.2.1)	36	25	105	6.73	at5g62670	34.1	transport.p- and v-ATPases
	1.34524	0.0451605	0.788653	A0A0R4J337	Expansin	21	4	27.6	8.27	at1g20190	10.7	cell wall.modification
+	2.74829	0.00178528	0.787574	K7KWK9	Uncharacterized protein	7	9	212.6	5.8	at5g51200	35.2	not assigned.unknown
+	1.51389	0.0306275	0.783771	C6T588	Bet_v_1 domain-containing protein	61	7	16.8	4.88	at1g24020	20.2.99	stress.abiotic.unspecified
+	2.10808	0.00779682	0.781902	I1JV20	Uncharacterized protein	6	2	52.6	6.1	at3g28670	35.2	not assigned.unknown
+	2.80152	0.00157934	0.777426	I1JVB1	Uncharacterized protein	38	2	10.3	10.05	at5g40080	29.2.1.2.2.99	protein.synthesis.ribosomal protein.eukaryotic.60S subunit.unknown
+	2.46163	0.0034544	0.77217	K7MBG3	Sucrose synthase (EC 2.4.1.13)	27	17	91.5	6.24	at5g49190	2.2.1.5	major CHO metabolism.degradation.sucrose.Susy
+	1.78616	0.0163621	0.769599	C6SXW1	Peptide-methionine (R)-S-oxide reductase (EC 1.8.4.12)	41	3	15.1	6.74	at4g04830	27.3.67	RNA.regulation of transcription.putative transcription regulator
+	1.72012	0.0190492	0.768928	I1NG02	Thioredoxin domain-containing protein	31	4	24.4	5.57	at2g18990	35.2	not assigned.unknown
+	3.92883	0.000117807	0.768677	C6TDW7	Uncharacterized protein	15	4	25.5	8.16	at3g51610	35.2	not assigned.unknown
+	2.84949	0.0014142	0.766567	C6T8S2	Uncharacterized protein	29	5	32.5	5.27	at1g09760	27.1	RNA.processing
+	2.82089	0.00151045	0.764146	I1JU82	Uncharacterized protein	13	9	109.2	7.44	at2g25140	20.2.1	stress.abiotic.heat
+	1.89827	0.0126395	0.762078	K7LK00	Uncharacterized protein	4	2	83.4	6.04	at5g23490	35.2	not assigned.unknown
+	2.86362	0.00136894	0.761683	K7KPN5	PPR_long domain-containing protein	13	4	50.9	7.88	at4g35850	35.1.5	not assigned.no ontology.pentatricopeptide (PPR) repeat-containing protein
+	2.49923	0.00316786	0.758215	I1JMK6	Uncharacterized protein	16	3	52.2	5.81	at4g01070	16.8.3	secondary metabolism.flavonoids.dihydroflavonols
+	2.11481	0.00767692	0.757355	C6T8Y6	AB hydrolase-1 domain-containing protein	29	5	35.4	6.46	at3g05600	26.1	misc.misc2
+	2.53683	0.00290515	0.756013	C6T9B7	Uncharacterized protein	21	5	31.6	7.24	at2g26210	31.1	cell.organisation
+	3.43956	0.000363444	0.747131	A0A0R0I177	Pyr_redox_2 domain-containing protein	55	16	46.8	5.91	at3g52880	21.2	redox.ascorbate and glutathione
+	1.86799	0.0135523	0.747129	I1KYU6	Alpha-1,4 glucan phosphorylase (EC 2.4.1.1)	33	17	95.8	6.43	at3g46970	2.2.2.2	major CHO metabolism.degradation.starch.starch phosphorylase
+	1.71368	0.0193341	0.746731	I1JDD2	Uncharacterized protein	29	7	48.8	7.21	at1g43190	27.1	RNA.processing
+	1.46633	0.0341717	0.743946	I1KD09	ATP synthase subunit gamma	41	11	35.4	9.06	at2g33040	9.9	mitochondrial electron transport / ATP synthesis.F1-ATPase
+	1.61825	0.0240852	0.742137	K7KUE2	Uncharacterized protein	20	7	83.7	4.98	at4g08550	21.4	redox.glutaredoxins
+	1.41146	0.0387738	0.741739	I1N628	Uncharacterized protein	53	9	29.7	9.07	at3g01280	34.2	transport.porins
+	2.7897	0.00162292	0.74092	I1JQD8	UBA domain-containing protein	14	3	45.2	7.21	at3g58460	29.5.11.3	protein.degradation.ubiquitin.E2
+	2.40077	0.00397399	0.740692	C6SYQ5	GLTP domain-containing protein	32	5	22.7	7.42	at2g33470	11.6	lipid metabolism.lipid transfer proteins etc
	1.33358	0.0463894	0.739381	C6T1V2	SHSP domain-containing protein	46	4	17.7	6.81	at1g53540	20.2.1	stress.abiotic.heat
+	1.89297	0.0127946	0.737096	I1JDM8	W2 domain-containing protein	17	6	48.7	6.64	at1g77840	29.2.3	protein.synthesis.initiation
+	1.50337	0.0313782	0.736691	K7L2B3	Glyco_transf_20 domain-containing protein	19	10	96.9	5.82	at1g68020	3.2.3	minor CHO metabolism.trehalose.potential TPS/TPP
+	2.17811	0.00663575	0.73645	B3TDK6	Lipoxygenase (EC 1.13.11.-)	73	45	96.7	6.58	at1g55020	17.7.1.2	hormone metabolism.jasmonate.synthesis-degradation.lipoxygenase
+	2.4632	0.00344189	0.733903	C6TB70	Thioredoxin domain-containing protein	56	7	24.4	6.92	at1g48130	21.5.2	redox.peroxiredoxin.PER1
+	1.65368	0.0221984	0.733611	C6TCX5	Peptidase_M24 domain-containing protein	35	10	43.5	6.7	at3g51800	29.5	protein.degradation
+	5.32529	4.72835e-06	0.733243	Q9SWB6	Probable bifunctional TENA-E protein (EC 3.5.1.-) (EC 3.5.99.2) (Aminopyrimidine aminohydrolase) (Formylaminopyrimidine amidohydrolase) (Formylaminopyrimidine deformylase) (Seed maturation protein PM36)	38	10	26	5.35	at3g16990	35.1	not assigned.no ontology
+	1.62761	0.0235717	0.733177	K7MT91	Aldo_ket_red domain-containing protein	69	12	32.3	6.73	at2g37770	3.5	minor CHO metabolism.others
+	1.48145	0.0330025	0.731646	C6T3P3	Uncharacterized protein	19	4	24.3	8.29	at1g30070	35.1	not assigned.no ontology
+	3.28886	0.00051421	0.73102	A0A0R4J3P8	Peptidase_M24 domain-containing protein	42	11	43.3	6.86	at3g51800	29.5	protein.degradation
+	2.81478	0.00153187	0.731006	C6TK48	Uncharacterized protein	7	2	44.9	5.57	at4g15410	29.5	protein.degradation
+	1.52888	0.0295883	0.729765	I1MTB5	B5 domain-containing protein	36	14	67.8	5.72	at1g72550	29.1.20	protein.aa activation.phenylalanine-tRNA ligase
+	3.63469	0.000231905	0.729108	I1LA46	Uncharacterized protein	25	5	30.6	6.68	at3g10300	30.3	signalling.calcium
+	2.10163	0.00791345	0.724314	C6TJT0	Uncharacterized protein	51	11	39.9	8.87	at3g08030	35.2	not assigned.unknown
+	2.57121	0.00268402	0.723704	A0A0R0GXL3	MLO-like protein	12	5	61.3	10.45	at1g61560	20.1.3.1	stress.biotic.signalling.MLO-like
+	1.48675	0.0326028	0.723362	A0A0R0KW93	Uncharacterized protein	5	2	65	5.05	at3g55760	35.2	not assigned.unknown
+	2.09363	0.00806067	0.719148	B6ZJZ9	Peroxisomal adenine nucleotide carrier 1 (GmPNC1)	15	3	34.7	9.69	at3g05290	34.9	transport.metabolite transporters at the mitochondrial membrane
+	1.42834	0.037296	0.716237	C6TMK3	Cysteine proteinase inhibitor	53	8	27.6	7.8	at3g12490	29.5.3	protein.degradation.cysteine protease
+	3.33094	0.000466723	0.712733	K7KWZ7	PPM-type phosphatase domain-containing protein	28	5	30.8	6.3	at3g15260	29.4	protein.postranslational modification
+	1.68395	0.0207037	0.710213	K7M6T0	Macro domain-containing protein	28	3	25.3	8.16	at2g40600	35.1	not assigned.no ontology
+	2.45352	0.00351945	0.70934	I1LMQ7	Uncharacterized protein	3	2	89.5	7.25	at5g05680	29.3.1	protein.targeting.nucleus
+	2.18164	0.00658201	0.708383	I1LES5	PB1 domain-containing protein	25	8	76.5	6.18	at2g01190	35.1	not assigned.no ontology
+	1.69998	0.0199534	0.707735	I1MTZ8	Tr-type G domain-containing protein	19	12	110	5.17	at1g06220	29.2.4	protein.synthesis.elongation
+	2.66652	0.00215518	0.706891	C6SVI1	V-type proton ATPase subunit F	55	5	14.5	6.57	at4g02620	34.1.1	transport.p- and v-ATPases.H+-transporting two-sector ATPase
+	2.17936	0.00661664	0.706512	A0A0R0LA35	Epimerase domain-containing protein	39	7	35.2	6.52	at5g58490	16.2.1.7	secondary metabolism.phenylpropanoids.lignin biosynthesis.CCR1
	1.41432	0.0385198	0.705062	K7LD23	Uncharacterized protein	15	7	66.2	7.53	at2g42520	27.1.2	RNA.processing.RNA helicase
+	1.53291	0.0293151	0.704042	C6TFT8	Annexin	42	11	35.6	6.46	at5g65020	31.1	cell.organisation
+	3.54719	0.000283669	0.699069	I1LCQ1	Pyruvate kinase (EC 2.7.1.40)	36	14	57.8	7.36	at3g52990	4.1.15	glycolysis.cytosolic branch.pyruvate kinase (PK)
	1.30917	0.0490716	0.697137	A0A0R4J3X4	SHSP domain-containing protein	31	4	25.6	7.49	at1g52560	20.2.1	stress.abiotic.heat
+	2.21888	0.00604118	0.696671	I1JE17	Glycosyltransferase (EC 2.4.1.-)	50	13	53.1	5.86	at4g34131	26.2	misc.UDP glucosyl and glucoronyl transferases
+	2.03562	0.00921259	0.695965	I1KJZ4	Uncharacterized protein	15	4	52.5	5.25	at5g02100	31.4	cell.vesicle transport
+	1.62685	0.023613	0.695467	I1J700	Aldo_ket_red domain-containing protein	28	8	35	6.73	at2g37770	3.5	minor CHO metabolism.others
+	2.99347	0.00101516	0.695041	I1N5M3	Elongation factor Ts, mitochondrial (EF-Ts) (EF-TsMt)	7	2	38.3	8.24	at4g11120	29.2.4	protein.synthesis.elongation
+	2.68551	0.00206295	0.690828	C6T770	RING-type domain-containing protein	21	4	37.2	8.12	at2g14835	29.5.11.4.2	protein.degradation.ubiquitin.E3.RING
+	1.50959	0.0309323	0.687057	C6TER4	NmrA domain-containing protein	33	8	34.9	6.81	at1g32100	16.2	secondary metabolism.phenylpropanoids
+	1.69805	0.0200423	0.686693	I1L7B5	Uncharacterized protein	15	7	67.9	8.44	at1g80270	27.3.67	RNA.regulation of transcription.putative transcription regulator
	1.33129	0.0466346	0.684689	C6TNZ4	Ferredoxin	49	3	16.3	5.1	at2g27510	7.3	OPP.electron transfer
+	2.73406	0.00184474	0.68413	C6SZZ1	Translocon-associated protein subunit beta (TRAP-beta) (Signal sequence receptor subunit beta)	26	3	20.9	9.36	at5g14030	35.1	not assigned.no ontology
+	2.61259	0.00244011	0.683901	A0A368UHY2	Uncharacterized protein	10	33	559.5	6.16	at3g02260	17.2.2	hormone metabolism.auxin.signal transduction
+	1.90441	0.0124622	0.682326	I1LAX4	Uncharacterized protein	35	14	82.9	7.43	at5g26710	29.1.17	protein.aa activation.glutamate-tRNA ligase
+	3.80048	0.000158316	0.679798	I1J7G5	Uncharacterized protein	47	5	18.6	5.02	at5g01300	35.1	not assigned.no ontology
+	2.32638	0.00471649	0.677123	C6T2R8	Uncharacterized protein	25	5	25	5.57	at1g78380	26.9	misc.glutathione S transferases
+	1.6596	0.0218977	0.67664	I1MHF8	Uncharacterized protein	15	8	99.4	5.29	at1g77550	31.1	cell.organisation
+	1.84669	0.0142334	0.676173	I1KBB6	4-alpha-glucanotransferase (EC 2.4.1.25) (Amylomaltase) (Disproportionating enzyme)	32	10	63.9	5.96	at5g64860	2.2.2.4	major CHO metabolism.degradation.starch.D enzyme
+	1.84167	0.014399	0.676146	I1M596	Lipoxygenase (EC 1.13.11.-)	69	39	97.2	6.67	at1g55020	17.7.1.2	hormone metabolism.jasmonate.synthesis-degradation.lipoxygenase
+	3.80226	0.000157667	0.673917	Q9LLQ6	Seed maturation protein PM34	71	17	31.7	7.08	at1g54870	26.22	misc.short chain dehydrogenase/reductase (SDR)
+	1.72385	0.0188865	0.669648	I1N0Q9	Uncharacterized protein	7	3	85.8	5.83	at1g11660	20.2.1	stress.abiotic.heat
+	2.05822	0.00874544	0.667415	I1MKT8	Glycosyltransferase (EC 2.4.1.-)	29	8	54.4	6.84	at2g15480	26.2	misc.UDP glucosyl and glucoronyl transferases
+	3.20383	0.000625422	0.665608	K7MGK0	AP-4 complex subunit epsilon	22	14	107.7	6.11	at1g31730	31.4	cell.vesicle transport
+	1.57948	0.026334	0.66463	I1KTV3	Ribosomal_L18e/L15P domain-containing protein	12	3	31	11.09	at5g64670	29.2.1.1.3.2.15	protein.synthesis.ribosomal protein.prokaryotic.unknown organellar.50S subunit.L15
+	1.49376	0.0320802	0.663706	I1L1F3	Uncharacterized protein	38	7	28.3	9.83	at2g01250	29.2.1.2.2.7	protein.synthesis.ribosomal protein.eukaryotic.60S subunit.L7
+	3.07703	0.000837464	0.663617	I1LP68	Bet_v_1 domain-containing protein	40	4	17.7	4.81	unknown	unknown	unknown
+	3.18855	0.000647809	0.662584	C6T374	VOC domain-containing protein	61	4	15.4	5.69	at1g07645	24.2	Biodegradation of Xenobiotics.lactoylglutathione lyase
+	2.41995	0.00380232	0.660732	I1NAA0	Uncharacterized protein	26	5	33.8	7.46	at2g37020	35.1	not assigned.no ontology
+	1.75745	0.0174802	0.658913	I1KBB9	OBG-type G domain-containing protein	21	5	42.6	8.65	at4g39520	30.5	signalling.G-proteins
+	1.51685	0.0304196	0.658113	K7MJA4	Uncharacterized protein	1	2	186.8	7.14	at5g47690	35.2	not assigned.unknown
+	2.09389	0.00805575	0.657978	I1KYG2	C2 domain-containing protein	26	8	46.6	4.7	at5g55530	20.2.2	stress.abiotic.cold
+	1.86671	0.0135923	0.657702	I1LNT7	Uncharacterized protein	6	4	83.7	6.01	at5g51300	27.1.1	RNA.processing.splicing
+	1.71486	0.0192813	0.657401	I1MU70	Uncharacterized protein	17	7	80	6.09	at3g54540	34.16	transport.ABC transporters and multidrug resistance systems
+	1.63488	0.0231802	0.656831	C6TD56	Glyceraldehyde-3-phosphate dehydrogenase (EC 1.2.1.-)	69	17	37	7.47	at3g04120	4.1.9	glycolysis.cytosolic branch.glyceraldehyde 3-phosphate dehydrogenase (GAP-DH)
	1.41325	0.0386147	0.65413	K7MH27	Uncharacterized protein	37	6	26.5	9.2	at2g16460	35.2	not assigned.unknown
+	1.52747	0.0296846	0.651859	I1NI24	ETF domain-containing protein	38	5	27.7	7.83	at5g43430	9.3	mitochondrial electron transport / ATP synthesis.electron transfer flavoprotein
+	1.5375	0.0290067	0.65173	C6SXN1	Uncharacterized protein	15	2	19.1	8.15	at4g12340	35.2	not assigned.unknown
	1.3524	0.0444223	0.650742	I1MW74	PCI domain-containing protein	27	8	47	6.04	at1g29150	29.5.11.20	protein.degradation.ubiquitin.proteasom
+	2.3865	0.00410678	0.649439	I1KLK0	Lipoxygenase (EC 1.13.11.-)	4	2	103	7.31	at1g17420	17.7.1.2	hormone metabolism.jasmonate.synthesis-degradation.lipoxygenase
+	2.41459	0.00384955	0.647717	C6T0R5	Ribosomal_L18e/L15P domain-containing protein	20	3	21	11.18	at3g05590	29.2.1.2.2.18	protein.synthesis.ribosomal protein.eukaryotic.60S subunit.L18
+	1.5494	0.0282231	0.641328	A0A0R0F1L5	Uncharacterized protein	25	5	28.3	7.05	at5g06060	26.8	misc.nitrilases, *nitrile lyases, berberine bridge enzymes, reticuline oxidases, troponine reductases
+	2.41193	0.00387318	0.640804	I1L0E5	Ubiquitin-like domain-containing protein	44	7	17.7	9.74	at1g23410	29.2.1.2.1.27	protein.synthesis.ribosomal protein.eukaryotic.40S subunit.S27
+	1.88272	0.0131002	0.636635	C6SY72	SWIB domain-containing protein	17	2	14.4	10.23	at1g31760	35.1	not assigned.no ontology
+	1.75737	0.0174835	0.635406	A0A0R4J3C5	Uncharacterized protein	21	7	51.4	7.64	at4g39660	13.1.1.3.11	amino acid metabolism.synthesis.central amino acid metabolism.alanine.alanine-glyoxylate aminotransferase
+	2.05409	0.00882889	0.631489	I1MH79	Translation machinery-associated protein 22	40	5	21	6.73	at5g11900	29.2.3	protein.synthesis.initiation
	1.39195	0.0405557	0.629741	I1K7Z3	Uncharacterized protein	12	2	29	9.04	at4g33350	29.3.3	protein.targeting.chloroplast
+	2.41482	0.00384748	0.629665	I1K4M7	Uncharacterized protein	38	17	70.8	5.21	at4g39690	35.2	not assigned.unknown
	1.42842	0.0372888	0.62633	I1LEY1	Uncharacterized protein	54	18	65.4	5.03	at3g25800	29.4	protein.postranslational modification
+	1.90133	0.0125508	0.624259	I1MRJ8	Uncharacterized protein	14	8	78.9	8.68	at3g06860	11.9.4.9	lipid metabolism.lipid degradation.beta-oxidation.multifunctional
+	2.33622	0.00461081	0.622794	C6TBR0	Uncharacterized protein	11	2	29.4	6.52	at1g52340	17.1.1.1.11	hormone metabolism.abscisic acid.synthesis-degradation.synthesis.short chain alcohol dehydrogenmase (ABA2)
+	1.64198	0.0228045	0.621775	K7KS35	Theta class glutathione S-transferase	19	3	28.4	9.64	at5g41210	26.9	misc.glutathione S transferases
+	1.92289	0.0119429	0.621342	I1N6Y7	Uncharacterized protein	10	5	85.9	7.14	at3g01720	35.2	not assigned.unknown
+	3.63196	0.000233366	0.617531	I1MT10	Uncharacterized protein	54	26	70.8	5.39	at1g16030	20.2.1	stress.abiotic.heat
+	2.14083	0.00723045	0.614136	A0A0R0IQ81	Glutaredoxin	35	4	17.9	7.37	at3g15660	21.4	redox.glutaredoxins
+	1.80672	0.0156057	0.613651	I1J495	Uncharacterized protein	10	5	87.5	6.9	at5g58100	35.2	not assigned.unknown
+	3.32466	0.000473524	0.611364	I1JB78	Uncharacterized protein	13	3	48.9	5.82	at5g18420	35.2	not assigned.unknown
	1.35081	0.0445851	0.609231	I1JRM7	Uncharacterized protein	53	10	35.7	4.73	at5g28830	30.3	signalling.calcium
+	2.22451	0.00596332	0.608913	I1J575	Uncharacterized protein	31	5	28.8	8.51	at5g05670	29.3.4.99	protein.targeting.secretory pathway.unspecified
+	2.18934	0.00646637	0.608389	C6SYZ8	Uncharacterized protein	23	5	23.6	10.32	at5g48760	29.2.1.2.2.513	protein.synthesis.ribosomal protein.eukaryotic.60S subunit.L13A
+	1.8318	0.0147299	0.606209	B0M195	Peroxisomal short-chain dehydrogenase/reductase family protein	29	4	26.3	8.69	at4g05530	26.22	misc.short chain dehydrogenase/reductase (SDR)
+	2.17966	0.00661217	0.605926	A0A0R0J965	Uncharacterized protein	50	11	34.4	6.9	at1g54870	26.22	misc.short chain dehydrogenase/reductase (SDR)
+	1.58548	0.0259729	0.605882	I1N4A7	Uncharacterized protein	54	9	29.8	8.65	at3g01280	34.2	transport.porins
+	2.27174	0.00534887	0.604266	C6T3E5	MPN domain-containing protein	39	4	22.9	5.78	at5g55940	35.2	not assigned.unknown
+	3.61463	0.000242866	0.603472	I1KB73	tRNA-binding domain-containing protein	35	8	42.3	6.29	at2g40660	29.1	protein.aa activation
+	2.08236	0.00827252	0.603291	I1MRK4	Dihydrolipoamide acetyltransferase component of pyruvate dehydrogenase complex (EC 2.3.1.-)	28	9	56.2	7.02	at3g06850	13.2.4.1	amino acid metabolism.degradation.branched-chain group.shared
+	1.64815	0.0224826	0.602866	I1LZK9	Uncharacterized protein	17	5	65.4	6.87	at4g22350	29.5.11.1	protein.degradation.ubiquitin.ubiquitin
+	2.85318	0.00140222	0.60151	I1KNN0	ATP-dependent 6-phosphofructokinase (ATP-PFK) (Phosphofructokinase) (EC 2.7.1.11) (Phosphohexokinase)	41	11	51.1	6.71	at5g47810	4.1.5	glycolysis.cytosolic branch.phosphofructokinase (PFK)
+	2.18832	0.00648152	0.600876	I1MZJ8	Uncharacterized protein	15	4	41.1	5.62	at3g02720	35.1	not assigned.no ontology
+	2.89636	0.00126951	0.600714	C6T763	PCI domain-containing protein	58	11	30.8	5.15	at1g64520	29.5.11.20	protein.degradation.ubiquitin.proteasom
+	2.42249	0.00378013	0.599719	I1KI20	SufE domain-containing protein	14	3	42.7	5.78	at4g26500	18.7	Co-factor and vitamine metabolism.iron-sulphur clusters
	1.3318	0.0465802	0.596455	I1N1M0	ATP-dependent 6-phosphofructokinase (ATP-PFK) (Phosphofructokinase) (EC 2.7.1.11) (Phosphohexokinase)	13	4	58.4	7.59	at2g22480	4.2.5	glycolysis.plastid branch.phosphofructokinase (PFK)
	1.37576	0.0420959	0.596166	I1N4I4	Uncharacterized protein	6	2	50.2	8.09	at3g29310	30.3	signalling.calcium
	1.38833	0.0408953	0.594102	A0A0R0EHQ5	Uncharacterized protein	1	2	239.4	6.83	at5g15680	35.2	not assigned.unknown
+	2.47767	0.00332912	0.593448	A0A0R0JJK8	Uncharacterized protein	15	7	69.4	7.27	at3g03250	4.1.2	glycolysis.cytosolic branch.UGPase
+	2.10923	0.0077762	0.592811	A0A368UIG3	Dolichyl-diphosphooligosaccharide--protein glycosyltransferase subunit 1	27	9	52.3	7.8	at2g01720	29.7	protein.glycosylation
+	3.51043	0.000308721	0.59233	I1NBE6	Uncharacterized protein	23	12	82.1	7.37	at3g62310	27.1.2	RNA.processing.RNA helicase
+	3.58307	0.000261173	0.590715	A0A0R0JW56	Pyruvate kinase (EC 2.7.1.40)	55	20	55.3	7.56	at5g08570	4.1.15	glycolysis.cytosolic branch.pyruvate kinase (PK)
+	1.72225	0.0189562	0.59035	I1KAV2	Uncharacterized protein	10	3	38.8	4.64	at4g27780	11.1.13	lipid metabolism.FA synthesis and FA elongation.acyl-CoA binding protein
+	1.668	0.0214782	0.589856	C6TJP9	WD_REPEATS_REGION domain-containing protein	8	2	38.2	7.06	at2g43770	35.1	not assigned.no ontology
+	1.72744	0.0187308	0.589347	I1NIN5	Uncharacterized protein	9	6	108.4	5.39	at1g09770	27.3.26	RNA.regulation of transcription.MYB-related transcription factor family
+	1.60669	0.0247349	0.587093	K7KP23	Uncharacterized protein	5	2	60.5	9	at5g63380	16.2	secondary metabolism.phenylpropanoids
+	2.14442	0.00717104	-0.585262	I1JU62	Transmembrane 9 superfamily member	20	9	73.1	7.62	at5g10840	35.2	not assigned.unknown
	1.32926	0.0468533	-0.585316	A0A0R0J895	Terpene cyclase/mutase family member (EC 5.4.99.-)	4	2	87.5	6.76	at1g78950	16.1.5	secondary metabolism.isoprenoids.terpenoids
+	2.08808	0.00816425	-0.585618	I1KQ30	Aldedh domain-containing protein	52	19	54.8	6.04	at3g24503	5.1	fermentation.aldehyde dehydrogenase
+	2.62083	0.00239423	-0.585744	C6TDP2	Uncharacterized protein	30	8	30.1	7.93	at4g32150	31.4	cell.vesicle transport
+	1.72485	0.018843	-0.586184	I1MR46	Uncharacterized protein	23	8	62	9.41	at4g22010	26.7	misc.oxidases - copper, flavone etc.
+	2.21903	0.00603908	-0.588231	I1LBH6	Uncharacterized protein	58	18	50.5	5	at5g17540	20.1	stress.biotic
+	2.34129	0.00455729	-0.588395	A0A0R4J301	Endoglucanase (EC 3.2.1.4)	9	4	57.7	6.09	at1g75680	26.3.4	misc.gluco-, galacto- and mannosidases.endoglucanase
+	1.9167	0.0121145	-0.589285	I1MVC1	Uncharacterized protein	41	15	69.4	8.35	at4g18030	20.2.3	stress.abiotic.drought/salt
+	1.87178	0.0134345	-0.590381	I1JRY5	Uncharacterized protein	20	5	37.4	9.55	at4g01100	34.9	transport.metabolite transporters at the mitochondrial membrane
+	1.92062	0.0120055	-0.590921	I1N1U5	Glycosyltransferase (EC 2.4.1.-)	29	9	53.3	5.6	at2g22590	16.8.1	secondary metabolism.flavonoids.anthocyanins
+	1.87958	0.0131954	-0.595195	I1K1I6	Isocitrate dehydrogenase [NADP] (EC 1.1.1.42)	30	13	53.3	8.12	at5g14590	8.1.4	TCA / org. transformation.TCA.IDH
+	2.75593	0.00175417	-0.595224	I1LCX7	RING-type E3 ubiquitin transferase (EC 2.3.2.27)	4	2	68.7	6.05	at3g54850	29.5.11.4.2	protein.degradation.ubiquitin.E3.RING
+	1.9616	0.0109245	-0.59686	I1MJH5	Uncharacterized protein	30	8	46.7	5.59	at1g10670	8.2.11	TCA / org. transformation.other organic acid transformaitons.atp-citrate lyase
+	1.98928	0.0102499	-0.597991	I1M6K2	C2 domain-containing protein	15	4	46.1	4.68	at5g55530	20.2.2	stress.abiotic.cold
+	2.04602	0.00899456	-0.598883	I1M989	Transmembrane 9 superfamily member	19	10	73.1	7.96	at5g10840	35.2	not assigned.unknown
+	1.85906	0.0138338	-0.598902	I1MGG7	Uncharacterized protein	27	9	60.1	7.36	at4g16155	11.1.31	lipid metabolism.FA synthesis and FA elongation.pyruvate DH
+	1.66573	0.0215908	-0.599541	C6TH16	Reticulon-like protein	15	2	28.6	7.65	at2g46170	35.1	not assigned.no ontology
+	1.77546	0.0167702	-0.601867	I1KPM9	TPR_REGION domain-containing protein	17	8	63.2	5.41	at4g10840	31.1	cell.organisation
+	2.96749	0.00107773	-0.603226	I1L5G4	Amidophosphoribosyltransferase (ATase) (EC 2.4.2.14) (Glutamine phosphoribosylpyrophosphate amidotransferase)	27	11	62	6.84	at2g16570	23.1.2.1	nucleotide metabolism.synthesis.purine.amidophosphoribosyltransferase
+	1.84436	0.01431	-0.604296	I1LY51	Oxidored_FMN domain-containing protein	72	16	44.1	8.15	at2g06050	17.7.1.5	hormone metabolism.jasmonate.synthesis-degradation.12-Oxo-PDA-reductase
+	2.78211	0.00165154	-0.606502	A0A0R4J2N9	Fe2OG dioxygenase domain-containing protein	31	6	40.6	5.82	at3g19010	21.2	redox.ascorbate and glutathione
+	1.97726	0.0105376	-0.606757	K7KSH9	MFS domain-containing protein	12	5	78.8	5.71	at4g35300	34.2	transporter.sugars
+	2.0617	0.00867557	-0.607518	A0A0R0FJI5	Uncharacterized protein	27	20	152.8	6.54	at3g14067	29.5.1	protein.degradation.subtilases
+	1.80459	0.0156824	-0.608052	I1LJJ4	Uncharacterized protein	57	17	53.5	6.87	at5g42650	17.7.1.3	hormone metabolism.jasmonate.synthesis-degradation.allene oxidase synthase
	1.31893	0.0479806	-0.609151	A6BM07	Isoflavone 7-O-glucosyltransferase 1 (EC 2.4.1.170) (UDP-glucose:isoflavone 7-O-glucosyltransferase)	11	3	52	5.34	at3g16520	26.2	misc.UDP glucosyl and glucoronyl transferases
+	2.83737	0.00145424	-0.609631	I1LIV5	FAD-binding PCMH-type domain-containing protein	47	19	66	8.21	at3g19820	17.3.1.2.8	hormone metabolism.brassinosteroid.synthesis-degradation.sterols.DWF1
+	2.66739	0.00215085	-0.611284	I1LYG4	t-SNARE coiled-coil homology domain-containing protein	19	4	30.3	6.58	at3g17440	31.4	cell.vesicle transport
+	2.46008	0.00346675	-0.614056	I1MR41	Aminomethyltransferase (EC 2.1.2.10) (Glycine cleavage system T protein)	40	10	44.3	8.15	at1g11860	1.2.4.2	PS.photorespiration.glycine cleavage.T subunit
+	1.6291	0.0234907	-0.615868	A0A0R4J5C5	Uncharacterized protein	63	8	27.6	7.3	at3g03980	26.22	misc.short chain dehydrogenase/reductase (SDR)
	1.44631	0.0357841	-0.61628	Q9FQE7	Glutathione S-transferase GST 11 (EC 2.5.1.18) (Tau class glutathione S-transferase)	49	7	25.5	6.24	at2g29420	26.9	misc.glutathione S transferases
+	2.65427	0.00221682	-0.616364	I1LXH8	Uncharacterized protein	18	5	50.8	6.73	at5g42090	35.2	not assigned.unknown
+	2.10756	0.00780615	-0.618202	A0A0R0FLF0	Xyloglucan endotransglucosylase/hydrolase (EC 2.4.1.207)	25	8	40.4	9.25	at5g13870	10.7	cell wall.modification
	1.47427	0.0335527	-0.619253	A0A0R0HFK7	Exostosin domain-containing protein	5	2	59.4	8.84	at5g16890	10.3	cell wall.hemicellulose synthesis
+	2.09594	0.00801788	-0.619975	I1M8Q5	Uncharacterized protein	28	10	54.4	6.02	at1g47128	29.5.3	protein.degradation.cysteine protease
	1.48327	0.032865	-0.623888	A0A0R4J3B7	Lipase_GDSL domain-containing protein	23	4	39.7	4.84	at5g45670	26.28	misc.GDSL-motif lipase
+	2.46605	0.00341938	-0.625757	I1M017	PPIase cyclophilin-type domain-containing protein	19	4	48.7	5.2	at3g01480	29.6	protein.folding
+	1.74997	0.017784	-0.626177	I1JN48	DNA gyrase subunit B (EC 5.6.2.3)	7	3	81.1	8.38	at5g04130	28.1	DNA.synthesis/chromatin structure
+	2.04222	0.00907366	-0.626428	I1MEW6	SOR_SNZ domain-containing protein	20	6	33.2	6.11	at5g01410	18	Co-factor and vitamine metabolism
+	1.93255	0.0116802	-0.626616	K7MLF2	AAA domain-containing protein	12	8	132.6	6.61	at4g02480	29.5.9	protein.degradation.AAA type
+	1.63705	0.0230647	-0.629478	I1MD33	LsmAD domain-containing protein	3	2	69.3	5.71	at1g54170	35.1	not assigned.no ontology
+	1.8675	0.0135675	-0.631659	I1LU49	PKS_ER domain-containing protein	41	8	38.2	6	at5g16970	26.7	misc.oxidases - copper, flavone etc.
	1.37002	0.0426558	-0.633403	I1KPI6	NAB domain-containing protein	2	2	162.5	5.01	at5g41790	30.11.1	signalling.light.COP9 signalosome
+	3.37148	0.000425124	-0.635938	Q6YGT9	Purple acid phosphatase (EC 3.1.3.2)	53	15	59.5	8.1	at5g34850	26.13	misc.acid and other phosphatases
+	2.65475	0.00221436	-0.635939	I1M658	Transmembrane 9 superfamily member	15	7	75.1	6.96	at4g12650	35.2	not assigned.unknown
+	2.09351	0.00806281	-0.638901	A0A0R0IG82	Aldedh domain-containing protein	18	6	56.5	6.42	at3g24503	5.1	fermentation.aldehyde dehydrogenase
+	1.79335	0.0160936	-0.642387	A0A0R0GAK0	Uncharacterized protein	48	10	30.6	8.4	at4g00430	34.19.1	transport.Major Intrinsic Proteins.PIP
+	1.92808	0.0118009	-0.642799	I1JM18	Transket_pyr domain-containing protein	41	7	39	6.54	at1g55510	13.2.4.1	amino acid metabolism.degradation.branched-chain group.shared
+	2.08345	0.0082519	-0.643838	I1KP02	Uncharacterized protein	27	11	65.3	5.05	at1g72160	34.99	transport.misc
+	2.11722	0.00763452	-0.646788	C6THB9	Uncharacterized protein	43	12	45.6	6.35	at5g22060	20.2.1	stress.abiotic.heat
+	1.79299	0.0161067	-0.647247	I1L327	DUF862 domain-containing protein	19	3	27.2	7.34	at4g25680	35.2	not assigned.unknown
+	2.26285	0.00545951	-0.65051	C6TK68	TPT domain-containing protein	11	3	36.2	9.29	at4g09810	35.1	not assigned.no ontology
+	2.45778	0.00348514	-0.653322	I1N4U1	6-phosphogluconate dehydrogenase, decarboxylating (EC 1.1.1.44)	59	20	53.6	5.9	at3g02360	7.1.3	OPP.oxidative PP.6-phosphogluconate dehydrogenase
	1.33707	0.046018	-0.654575	F6KBT5	Allene oxide cyclase 5 (EC 5.3.99.6)	23	5	28.4	8.63	at1g13280	17.7.1.4	hormone metabolism.jasmonate.synthesis-degradation.allene oxidase cyclase
+	1.77948	0.0166157	-0.656907	Q8S5C1	4-coumarate:CoA ligase isoenzyme 2 (EC 6.2.1.12)	27	11	60.1	6.74	at3g21240	16.2.1.3	secondary metabolism.phenylpropanoids.lignin biosynthesis.4CL
+	1.95001	0.0112199	-0.657558	I1JIC8	PRA1 family protein	26	3	23.1	9.82	at2g38360	31.4	cell.vesicle transport
+	1.48062	0.033066	-0.658456	I1MDX7	Uncharacterized protein	14	3	31.9	8.15	at5g64260	30.1.1	signalling.in sugar and nutrient physiology
+	1.98682	0.010308	-0.660816	C6TK33	Uncharacterized protein	41	10	32.5	6.7	at2g21170	1.3.5	PS.calvin cycle.TPI
	1.35547	0.0441089	-0.668073	K7MNJ0	GH10 domain-containing protein	11	8	103.3	6.92	at1g58370	10.6.2	cell wall.degradation.mannan-xylose-arabinose-fucose
+	1.59937	0.0251555	-0.669684	A0A0R0LJH9	Protein transport protein sec16	4	4	152	5.12	at5g47490	35.2	not assigned.unknown
+	2.09201	0.00809084	-0.671188	A0A0R0JMI0	Glutamine amidotransferase type-2 domain-containing protein	16	20	239.4	6.57	at5g53460	12.2.1.2	N-metabolism.ammonia metabolism.glutamate synthase.NADH dependent
	1.41735	0.0382515	-0.671787	I1JUM2	Plasma membrane ATPase (EC 7.1.2.1)	28	19	104.4	6.93	at2g24520	34.1	transport.p- and v-ATPases
+	1.58216	0.0261719	-0.672532	K7LZA7	SHSP domain-containing protein	11	2	48.1	5.36	at5g04890	20.2.1	stress.abiotic.heat
+	2.02497	0.00944121	-0.672567	C6T218	Cytochrome b5 heme-binding domain-containing protein	36	2	13.6	5.11	at1g26340	21.2	redox.ascorbate and glutathione
+	1.63591	0.0231256	-0.680326	C6SVR0	Plastocyanin	39	3	16.8	5.2	at1g76100	1.1.5.1	PS.lightreaction.other electron carrier (ox/red).plastocyanin
+	2.10327	0.00788371	-0.681262	I1LJG0	Glycosyltransferase (EC 2.4.2.-)	22	6	49.4	8.78	at1g19360	35.2	not assigned.unknown
+	1.69537	0.0201667	-0.681718	I1MC85	Uncharacterized protein	32	10	45.8	5.82	at3g21190	35.2	not assigned.unknown
+	3.18524	0.000652771	-0.6826	A0A0R0HNL5	NAB domain-containing protein	2	4	251.2	4.97	at1g03080	29.4	protein.postranslational modification
+	3.77464	0.000168021	-0.684252	I1KM16	Uncharacterized protein	64	13	28.1	5.68	at4g34050	16.2.1.6	secondary metabolism.phenylpropanoids.lignin biosynthesis.CCoAOMT
+	2.28216	0.00522202	-0.68454	A0A0R0GYY6	Abhydrolase_3 domain-containing protein	35	7	30.5	5.29	at5g16080	24	Biodegradation of Xenobiotics
+	1.78654	0.0163476	-0.68728	A0A0R0H975	Apocytochr_F_N domain-containing protein	34	7	35.3	8.82	atcg00540	1.1.3	PS.lightreaction.cytochrome b6/f
+	3.44394	0.000359799	-0.690318	K7MU41	Uncharacterized protein	26	10	66.9	8.53	at4g00740	20.2.3	stress.abiotic.drought/salt
+	1.71259	0.0193824	-0.691317	I1MM41	Uncharacterized protein	9	3	58.3	6	at3g03530	11.9.3.5	lipid metabolism.lipid degradation.lysophospholipases.phosphoinositide phospholipase C
+	2.59117	0.00256346	-0.69238	I1KUF1	Fn3_like domain-containing protein	15	7	83.8	6.02	at5g64570	10.6.2	cell wall.degradation.mannan-xylose-arabinose-fucose
+	2.3173	0.00481617	-0.693096	C6TCI6	Glutamate decarboxylase (EC 4.1.1.15)	45	15	56.2	5.81	at3g17760	13.1.1.1.1	amino acid metabolism.synthesis.central amino acid metabolism.GABA.Glutamate decarboxylase
+	3.30581	0.000494531	-0.693145	A0A368UJK6	Uncharacterized protein	12	7	125.3	5.26	at2g34680	17.2.3	hormone metabolism.auxin.induced-regulated-responsive-activated
+	1.66011	0.0218722	-0.693754	I1MR83	DUF3700 domain-containing protein	32	5	25.5	5.6	at5g19140	15	metal handling
+	2.4495	0.00355224	-0.695207	I1K478	YTH domain-containing protein	13	7	77.1	6.62	at3g13460	30.3	signalling.calcium
+	1.99039	0.0102237	-0.695581	I1J8X9	Flavodoxin-like domain-containing protein	25	4	28	7.2	at4g36750	11.8	lipid metabolism.''exotics'' (steroids, squalene etc)
	1.32797	0.0469928	-0.698887	C6T2H1	Flavodoxin-like domain-containing protein	57	8	21.7	6.95	at4g27270	11.8	lipid metabolism.''exotics'' (steroids, squalene etc)
+	1.5633	0.0273335	-0.704091	I1L2I7	Serine/threonine-protein phosphatase (EC 3.1.3.16)	33	7	35.8	5.41	at3g58500	29.4	protein.postranslational modification
+	2.80399	0.00157041	-0.705937	I1LUM7	ALOG domain-containing protein	37	4	19.6	9.09	at2g42610	35.2	not assigned.unknown
+	2.97352	0.00106286	-0.708715	I1K2B5	Uncharacterized protein	20	9	79.6	6.6	at5g67360	29.5.1	protein.degradation.subtilases
+	1.8246	0.0149761	-0.713003	I1K642	Uncharacterized protein	13	5	53.6	6.68	at4g29680	23.4.99	nucleotide metabolism.phosphotransfer and pyrophosphatases.misc
+	2.703	0.00198154	-0.713819	I1LU10	Uncharacterized protein	46	13	46.3	6.3	at5g22060	20.2.1	stress.abiotic.heat
+	2.4507	0.0035424	-0.714687	I1LN30	Adenosylhomocysteinase (EC 3.3.1.1)	61	20	53.3	6.23	at4g13940	13.2.3.4	amino acid metabolism.degradation.aspartate family.methionine
+	3.34441	0.00045247	-0.715889	I1N8A2	Uncharacterized protein	11	5	69.7	6.9	at5g20950	10.6.1	cell wall.degradation.cellulases and beta -1,4-glucanases
+	3.53321	0.000292945	-0.725197	I1KHB7	Germin-like protein	46	3	23.8	8.46	at5g20630	20.2.99	stress.abiotic.unspecified
+	2.50244	0.00314459	-0.728067	A0A0R0JQA9	X8 domain-containing protein	19	2	21.5	7.24	at1g18650	26.4	misc.beta 1,3 glucan hydrolases
+	2.60934	0.00245843	-0.728982	I1LJH2	Uncharacterized protein	32	9	52	5.36	at4g34350	16.1.1.7	secondary metabolism.isoprenoids.non-mevalonate pathway.HDR
+	1.74985	0.017789	-0.732004	I1L1Q3	Uncharacterized protein	12	2	45.1	7.2	at3g45310	29.5.3	protein.degradation.cysteine protease
+	1.72127	0.018999	-0.732159	A0A0R0EQE5	Uncharacterized protein	33	16	70.3	6.04	at1g04430	20.2.3	stress.abiotic.drought/salt
+	2.32233	0.00476064	-0.735192	I1K512	RING-type domain-containing protein	10	2	47.3	6.09	at5g63970	29.5.11.4.2	protein.degradation.ubiquitin.E3.RING
+	1.60612	0.0247673	-0.737347	I1KRD0	Uncharacterized protein	12	2	47.8	6.3	at5g61820	35.2	not assigned.unknown
+	1.76592	0.0171426	-0.742102	A0A0R0JPL6	Peptidase A1 domain-containing protein	44	10	50	8.24	at1g09750	27.3.99	RNA.regulation of transcription.unclassified
	1.32771	0.0470205	-0.742606	I1KIA1	Post-GPI attachment to proteins factor 3	5	2	39.9	7.27	at1g16560	20.2	stress.abiotic
+	1.50172	0.0314977	-0.745159	E2FKH8	Sieve element occlusion by forisomes 1	7	3	75.2	6.64	at3g01680	35.2	not assigned.unknown
+	2.7236	0.00188971	-0.747196	B1NC19	Putative cysteine protease	14	3	39	7.3	at3g45310	29.5.3	protein.degradation.cysteine protease
+	1.80212	0.0157716	-0.748023	I1MQP2	Cellulase domain-containing protein	7	3	56.2	5.62	at5g01930	10.6.2	cell wall.degradation.mannan-xylose-arabinose-fucose
+	1.40174	0.0396511	-0.74848	I1KIJ3	Uncharacterized protein	3	2	117.3	7.12	at2g42010	11.9.3.1	lipid metabolism.lipid degradation.lysophospholipases.phospholipase D
	1.31226	0.048724	-0.748831	I1NHB5	Dihydrolipoamide acetyltransferase component of pyruvate dehydrogenase complex (EC 2.3.1.-)	32	9	48.4	8.63	at1g34430	8.1.1.2	TCA / org. transformation.TCA.pyruvate DH.E2
+	2.32031	0.00478288	-0.749028	I1L2C2	Transmembrane 9 superfamily member	21	10	74.9	6.18	at5g35160	35.2	not assigned.unknown
+	1.76336	0.0172439	-0.750563	A0A0R4J5R0	Fe2OG dioxygenase domain-containing protein	19	4	37	5.88	at3g50210	16.8.4	secondary metabolism.flavonoids.flavonols
+	2.25882	0.00551039	-0.755969	G0T437	Purple acid phosphatase (EC 3.1.3.2)	17	7	74.1	6.35	at1g13900	26.13	misc.acid and other phosphatases
+	2.5726	0.00267549	-0.757353	I1J940	RPW8 domain-containing protein	6	3	94.5	6.51	at5g66900	20.1.7	stress.biotic.PR-proteins
+	2.5928	0.00255389	-0.758363	I1J4T0	t-SNARE coiled-coil homology domain-containing protein	12	2	30.1	6.1	at5g46860	31.4	cell.vesicle transport
+	2.28415	0.00519812	-0.758422	I1MGZ2	Plasma membrane ATPase (EC 7.1.2.1)	40	29	105	6.81	at4g30190	34.1.2	transport.p- and v-ATPases.H+-exporting ATPase
+	1.70982	0.0195066	-0.759272	I1JE07	Uncharacterized protein	45	12	36.9	7.05	at4g34050	16.2.1.6	secondary metabolism.phenylpropanoids.lignin biosynthesis.CCoAOMT
+	1.41991	0.0380268	-0.759358	C6TMK6	AAI domain-containing protein	40	3	13.3	8.05	at2g45180	26.21	misc.protease inhibitor/seed storage/lipid transfer protein (LTP) family protein
+	2.01252	0.00971589	-0.759804	I1NBJ8	Pectin acetylesterase (EC 3.1.1.-)	35	6	45.2	7.2	at2g46930	10.8.2	cell wall.pectin*esterases.acetyl esterase
+	3.57034	0.000268944	-0.764311	C6T225	Uncharacterized protein (Fragment)	24	4	22.2	5	at3g54840	30.5	signalling.G-proteins
+	1.4864	0.0326287	-0.764339	I1KSB7	X8 domain-containing protein	13	4	53	5.16	at3g13560	26.4.1	misc.beta 1,3 glucan hydrolases.glucan endo-1,3-beta-glucosidase
+	1.77502	0.0167872	-0.76724	C6T2V7	Phytocyanin domain-containing protein	18	2	26.1	4.87	at1g08500	26.19	misc.plastocyanin-like
+	2.18312	0.00655959	-0.769805	I1KYC6	Peptidase A1 domain-containing protein	14	4	51.9	7.84	at5g10770	27.3.99	RNA.regulation of transcription.unclassified
+	3.57718	0.000264737	-0.76995	A0A0R4J5M9	Uncharacterized protein	13	3	38.8	7.59	at3g45310	29.5.3	protein.degradation.cysteine protease
+	1.72107	0.0190078	-0.770496	I1M1I9	Uncharacterized protein	5	3	82	9.28	at1g30360	20.2.3	stress.abiotic.drought/salt
+	3.09861	0.000796866	-0.770759	I1KBK8	Uncharacterized protein	23	13	91	5.25	at5g64030	20.2.3	stress.abiotic.drought/salt
+	1.6448	0.0226571	-0.775263	I1MT77	Uncharacterized protein	29	8	50.1	5.67	at5g60980	29.3.1	protein.targeting.nucleus
+	3.01334	0.000969745	-0.776233	I1K775	X8 domain-containing protein	12	3	48.3	5	at4g34480	35.1	not assigned.no ontology
+	3.80343	0.000157243	-0.777003	I1KRP1	Transmembrane 9 superfamily member	20	11	69.2	7.47	at2g01970	35.1	not assigned.no ontology
+	1.7546	0.0175954	-0.779203	C5HU39	AIR12	20	3	25.6	7.5	at3g07390	17.2.3	hormone metabolism.auxin.induced-regulated-responsive-activated
+	1.48771	0.0325303	-0.779605	I1JVD1	Uncharacterized protein	6	3	78.7	6.73	at1g78240	20.2.3	stress.abiotic.drought/salt
+	3.4702	0.000338685	-0.780279	I1MZ96	Uncharacterized protein	9	4	75.4	5.72	at2g39750	20.2.3	stress.abiotic.drought/salt
+	1.56519	0.0272152	-0.781092	I1LTS0	Arogenate dehydratase (EC 4.2.1.91)	17	5	46.2	7.84	at1g08250	13.1.6.3.1	amino acid metabolism.synthesis.aromatic aa.phenylalanine.arogenate dehydratase / prephenate dehydratase
+	3.95539	0.000110818	-0.787378	I1JL58	PRA1 family protein	11	2	24.2	8.19	at2g38360	31.4	cell.vesicle transport
+	2.31282	0.00486607	-0.787411	C6SYW1	Bet_v_1 domain-containing protein	44	6	17	5.12	at1g24020	20.2.99	stress.abiotic.unspecified
+	1.59159	0.0256099	-0.787667	I1L7Z5	Peroxidase (EC 1.11.1.7)	18	4	35.1	6.3	at1g05260	20.2.2	stress.abiotic.cold
+	3.19226	0.000642308	-0.789466	I1J5A5	Aldedh domain-containing protein	50	16	58.4	6.84	at1g23800	5.1	fermentation.aldehyde dehydrogenase
+	1.72449	0.0188586	-0.790927	I1K7Q8	NmrA domain-containing protein	60	12	34.2	6.06	at4g39230	16.8.5	secondary metabolism.flavonoids.isoflavonols
+	1.79517	0.0160262	-0.792988	P13708	Sucrose synthase (EC 2.4.1.13) (Nodulin-100) (N-100) (Sucrose-UDP glucosyltransferase)	75	46	92.2	6.48	at3g43190	2.2.1.5	major CHO metabolism.degradation.sucrose.Susy
+	2.14678	0.0071321	-0.793481	K7L6B6	NAD(P)-bd_dom domain-containing protein	9	3	45.7	8.98	at1g30620	10.1.9	cell wall.precursor synthesis.MUR4
+	3.41801	0.000381937	-0.794175	C6TH50	Xyloglucan endotransglucosylase/hydrolase (EC 2.4.1.207)	22	5	35	5.01	at1g11545	10.7	cell wall.modification
+	1.41186	0.0387386	-0.795657	I1LWZ5	PMR5N domain-containing protein	7	2	50.4	6.84	at5g15900	35.2	not assigned.unknown
+	3.71291	0.000193684	-0.800852	C6TA28	Nucleoside diphosphate kinase (EC 2.7.4.6)	15	2	25.2	9.03	at5g63310	23.4.10	nucleotide metabolism.phosphotransfer and pyrophosphatases.nucleoside diphosphate kinase
+	1.96979	0.0107204	-0.803862	C6SX29	ACT domain-containing protein	22	2	16.6	4.7	at2g40435	35.2	not assigned.unknown
+	2.86577	0.00136217	-0.805449	Q6RUF9	Proline dehydrogenase (EC 1.5.5.2)	9	3	54.4	8.13	at5g38710	13.2.2.2	amino acid metabolism.degradation.glutamate family.proline
+	2.23541	0.00581557	-0.811726	I1JJA3	Uncharacterized protein	8	3	59.5	6.8	at3g20410	30.3	signalling.calcium
+	1.70596	0.0196806	-0.812962	I1LZN1	Transmembrane 9 superfamily member	17	8	77.5	6.96	at5g35160	35.2	not assigned.unknown
+	1.66112	0.0218211	-0.816289	I1MV80	Cupin_2 domain-containing protein	51	7	33	6.61	at4g17050	27.3.30	RNA.regulation of transcription.Trihelix, Triple-Helix transcription factor family
+	1.44456	0.0359288	-0.821095	I1NAB2	Uncharacterized protein	9	8	146.2	7.62	at2g36910	34.16	transport.ABC transporters and multidrug resistance systems
+	2.23429	0.00583054	-0.821707	A0A0R0JYE8	Uncharacterized protein	3	2	101	8.53	at5g51060	20.1.1	stress.biotic.respiratory burst
+	3.1438	0.000718122	-0.822395	I1JIW1	Amidohydro-rel domain-containing protein	19	5	57.8	6.54	at5g12200	23.2	nucleotide metabolism.degradation
	1.30501	0.0495441	-0.824311	A0A0R0KVX2	Fe2OG dioxygenase domain-containing protein	15	3	39.7	6.84	at4g10500	35.1	not assigned.no ontology
+	2.82609	0.0014925	-0.828116	C6THF2	Uncharacterized protein	14	2	31.5	5.36	at1g32400	33.99	development.unspecified
+	1.45691	0.0349214	-0.828443	A0A0R0GFB2	Uncharacterized protein	54	18	57.5	8.87	at2g44480	26.3	misc.gluco-, galacto- and mannosidases
+	2.04032	0.00911344	-0.833231	A0A0R4J4S6	NADPH-protochlorophyllide oxidoreductase (EC 1.3.1.33)	52	13	43.2	8.78	at5g54190	19.14	tetrapyrrole synthesis.protochlorophyllide reductase
+	2.2135	0.00611651	-0.837863	I1K7G0	Methyltransferase (EC 2.1.1.-)	34	10	40.4	6.74	at1g20330	17.3.1.2.2	hormone metabolism.brassinosteroid.synthesis-degradation.sterols.SMT2
+	1.85111	0.0140894	-0.839945	C6TJF9	Uncharacterized protein	55	8	24	6.58	at1g09630	30.5	signalling.G-proteins
+	2.59981	0.00251297	-0.84014	I1JHV7	Uncharacterized protein	10	2	29.7	7.64	at5g37660	30.2.99	signalling.receptor kinases.misc
+	1.81184	0.0154225	-0.844762	C6T1F3	Uncharacterized protein	26	2	12.1	9.61	at2g27730	35.2	not assigned.unknown
+	1.81899	0.015171	-0.847056	I1KUQ6	Lipoxygenase (EC 1.13.11.-)	26	15	97.1	7.4	at1g55020	17.7.1.2	hormone metabolism.jasmonate.synthesis-degradation.lipoxygenase
+	3.92913	0.000117725	-0.852385	K7M429	Uncharacterized protein	30	10	45.6	6.28	at3g21190	35.2	not assigned.unknown
+	1.41229	0.0387002	-0.85467	I1J4P0	TFIIS N-terminal domain-containing protein	5	2	57.6	5.38	at1g32130	27.3.99	RNA.regulation of transcription.unclassified
+	1.5625	0.0273845	-0.855193	A0A0R4J508	Expansin	11	2	27.9	9.26	at2g39700	10.7	cell wall.modification
+	1.45725	0.0348939	-0.856204	I1KW78	Uncharacterized protein	23	8	60.8	9.16	at3g14690	26.1	misc.cytochrome P450
+	2.1522	0.00704373	-0.856267	I1LXW3	Transmembrane 9 superfamily member	16	7	74.7	5.78	at4g12650	35.2	not assigned.unknown
+	1.76857	0.0170384	-0.857242	C6SVL3	Phytocyanin domain-containing protein	16	2	19.3	6.93	at2g25060	26.19	misc.plastocyanin-like
+	2.59249	0.00255571	-0.857482	I1L295	Uncharacterized protein	4	2	60.1	6.64	at2g12400	35.2	not assigned.unknown
+	2.13318	0.00735905	-0.857766	A0A368UGT8	Uncharacterized protein	46	12	50.4	5.14	at5g18280	23.2	nucleotide metabolism.degradation
+	3.2337	0.000583847	-0.862586	I1MXA0	Uncharacterized protein	4	2	63.2	5.36	at5g11920	3.5	minor CHO metabolism.others
+	2.63302	0.00232801	-0.867128	C6SVC7	Uncharacterized protein	32	3	20.2	7.87	at4g27435	35.2	not assigned.unknown
+	3.64532	0.000226296	-0.867242	I1L3Z7	Transmembrane 9 superfamily member	19	7	48	7.46	at1g14670	35.1	not assigned.no ontology
+	1.66754	0.0215012	-0.871638	A0A0R0GIU4	Peroxidase (EC 1.11.1.7)	24	5	35.2	7.83	at5g05340	26.12	misc.peroxidases
+	1.61571	0.0242264	-0.876165	I1L340	C2 domain-containing protein	15	3	30.3	5.03	at5g23950	20.2.2	stress.abiotic.cold
+	2.57751	0.00264539	-0.87726	I1KFE9	Uncharacterized protein	30	9	60.1	7.77	at1g76160	35.1	not assigned.no ontology
+	1.45813	0.034823	-0.879897	A0A0R0LAT1	Protein kinase domain-containing protein	10	5	66.4	7.5	at1g48480	30.2.3	signalling.receptor kinases.leucine rich repeat III
+	1.34746	0.04493	-0.880035	K7K770	PWWP domain-containing protein	3	2	111.3	4.94	at5g02950	27.3.68	RNA.regulation of transcription.PWWP domain protein
+	3.89273	0.000128016	-0.883768	K7L3Q8	Uncharacterized protein	12	5	53.5	6.2	at1g09020	29.4	protein.postranslational modification
+	1.31933	0.0479369	-0.886589	I1LBI3	Cysteine synthase (EC 2.5.1.47)	16	3	34.5	5.45	at3g04940	13.1.5.3.1	amino acid metabolism.synthesis.serine-glycine-cysteine group.cysteine.OASTL
+	1.94205	0.0114274	-0.887235	I1KUJ7	Uncharacterized protein	6	2	58.4	6.46	at2g01070	35.1	not assigned.no ontology
+	2.66204	0.00217751	-0.888305	I1NBM7	Uncharacterized protein	32	10	55.5	6.73	at1g11910	29.5.4	protein.degradation.aspartate protease
+	3.08709	0.000818289	-0.891218	I1JIV1	Phytocyanin domain-containing protein	18	2	25.8	4.75	at1g08500	26.19	misc.plastocyanin-like
+	1.70074	0.0199187	-0.894215	I1K8W1	TPT domain-containing protein	5	2	38.6	8.84	at2g25520	34.8	transport.metabolite transporters at the envelope membrane
+	1.35836	0.0438166	-0.894634	A0A0R0L3G5	Amino_oxidase domain-containing protein	5	3	66.8	7.87	at1g06820	16.1.4	secondary metabolism.isoprenoids.carotenoids
+	1.4376	0.036509	-0.896009	C6SVZ6	AAI domain-containing protein	47	3	12.4	7.96	at3g53980	26.21	misc.protease inhibitor/seed storage/lipid transfer protein (LTP) family protein
+	2.33468	0.00462717	-0.899802	Q9SWA8	Glycine-rich RNA-binding protein	61	8	15.8	7.2	at2g21660	27.4	RNA.RNA binding
+	2.22775	0.00591904	-0.900019	Q96446	Actin (Fragment)	38	5	22.4	5.62	at3g12110	31.1	cell.organisation
+	1.4986	0.0317251	-0.900689	C6T447	Uncharacterized protein	40	6	25.1	6.35	at5g65270	30.5	signalling.G-proteins
+	1.75878	0.017427	-0.900881	A0A0R0HDJ7	PEROXIDASE_4 domain-containing protein	8	2	31.2	9.04	at4g35000	21.2.1	redox.ascorbate and glutathione.ascorbate
+	1.71012	0.0194931	-0.904071	I1LLM7	Asparagine synthetase [glutamine-hydrolyzing] (EC 6.3.5.4)	51	19	65.2	6.64	at3g47340	13.1.3.1.1	amino acid metabolism.synthesis.aspartate family.asparagine.asparagine synthetase
+	1.44146	0.0361857	-0.904959	D2D5G3	Methyltransferase (EC 2.1.1.-)	31	9	40.4	6.95	at1g20330	17.3.1.2.2	hormone metabolism.brassinosteroid.synthesis-degradation.sterols.SMT2
+	2.29981	0.00501407	-0.914388	C6SYP7	Dirigent protein	18	2	24.2	8.37	at1g65870	20.1.7	stress.biotic.PR-proteins
+	1.53026	0.0294945	-0.919591	A0A0R0FQV9	Xyloglucan endotransglucosylase/hydrolase (EC 2.4.1.207)	28	7	33.7	6.93	at5g13870	10.7	cell wall.modification
+	2.39638	0.00401438	-0.922068	Q9ZNZ5	Peroxidase (EC 1.11.1.7) (Fragment)	36	8	38.5	8.13	at1g05260	20.2.2	stress.abiotic.cold
+	1.35528	0.0441283	-0.922729	I1MER4	PMR5N domain-containing protein	28	6	42.3	8.75	at1g29050	35.2	not assigned.unknown
+	3.34166	0.000455343	-0.926861	C6T487	Uncharacterized protein	19	3	19.8	7.09	at2g24290	35.2	not assigned.unknown
+	2.1536	0.00702106	-0.92688	I1M4U9	NAD(P)-bd_dom domain-containing protein	51	11	39.1	8.13	at2g28760	10.1.5	cell wall.precursor synthesis.UXS
+	1.87678	0.0132806	-0.929498	A0A0R0IIS3	Cas1_AcylT domain-containing protein	4	2	67.1	8.81	at2g34410	26.5	misc.acyl transferases
+	1.462	0.0345144	-0.937449	K7KDX4	Uncharacterized protein	4	2	71.3	8.43	at3g07420	29.1.22	protein.aa activation.asparagine-tRNA ligase
+	2.40752	0.00391274	-0.937667	B9VJS7	Starch synthase IIa-2	7	4	86.5	6.28	at3g01180	2.1.2.2	major CHO metabolism.synthesis.starch.starch synthase
+	2.39435	0.00403318	-0.94069	I1MPK1	Uncharacterized protein	6	2	49.9	5.58	at5g23940	35.1	not assigned.no ontology
+	1.94369	0.0113844	-0.941383	A0A0R4J3J1	Peroxidase (EC 1.11.1.7)	43	11	35.2	8.06	at1g05260	20.2.2	stress.abiotic.cold
+	2.52947	0.00295484	-0.941501	C6TIR2	Uncharacterized protein	58	5	16.9	4.27	at3g43810	30.3	signalling.calcium
+	2.29655	0.00505185	-0.943445	I1JDK6	Uncharacterized protein	12	4	50.7	6.92	at5g42090	35.2	not assigned.unknown
+	2.27938	0.00525557	-0.943497	I1KBS7	Uncharacterized protein	39	12	62.5	4.86	at1g72160	34.99	transport.misc
+	2.81859	0.00151848	-0.945232	I1LPL0	FAD-binding PCMH-type domain-containing protein	47	19	66	8.22	at3g19820	17.3.1.2.8	hormone metabolism.brassinosteroid.synthesis-degradation.sterols.DWF1
+	1.64625	0.0225815	-0.945939	K7MCL5	Flavin-containing monooxygenase (EC 1.-.-.-)	14	4	59.3	7.83	at1g19250	26.7	misc.oxidases - copper, flavone etc.
+	2.25536	0.0055545	-0.951876	Q2MJR5	Myo-inositol-1-phosphate synthase	56	13	56.4	5.54	at2g22240	3.4.3	minor CHO metabolism.myo-inositol.InsP Synthases
+	3.05218	0.000886791	-0.957918	C6TGB8	Uncharacterized protein	36	10	46.2	6.1	at3g21190	35.2	not assigned.unknown
+	1.80078	0.0158204	-0.966331	I1K0L4	Uncharacterized protein	34	15	71.7	6	at1g12240	2.2.1.3.3	major CHO metabolism.degradation.sucrose.invertases.vacuolar
+	2.5937	0.00254857	-0.967838	K7LSM2	Uncharacterized protein	41	45	153.5	4.72	at2g32240	35.2	not assigned.unknown
+	1.79877	0.015894	-0.972413	I1LLM2	Asparagine synthetase [glutamine-hydrolyzing] (EC 6.3.5.4)	51	19	65.2	6.64	at3g47340	13.1.3.1.1	amino acid metabolism.synthesis.aspartate family.asparagine.asparagine synthetase
+	2.99342	0.00101526	-0.974434	C6ZGA8	Somatic embryogenesis receptor kinase	11	3	68.9	5.73	at1g71830	30.2.2	signalling.receptor kinases.leucine rich repeat II
+	3.05906	0.00087286	-0.977527	A0A0R0HYB1	Uncharacterized protein	59	18	51.6	8.34	at4g39660	13.1.1.3.11	amino acid metabolism.synthesis.central amino acid metabolism.alanine.alanine-glyoxylate aminotransferase
+	2.01775	0.0095995	-0.979216	I1KL23	Uncharacterized protein	15	3	50	7.58	at4g33945	35.1.3	not assigned.no ontology.armadillo/beta-catenin repeat family protein
+	2.25864	0.00551263	-0.982042	C6TH72	Fe2OG dioxygenase domain-containing protein	25	4	32.9	5.43	at4g33910	26.7	misc.oxidases - copper, flavone etc.
+	1.4896	0.0323889	-0.98808	K7N544	CMP/dCMP-type deaminase domain-containing protein	26	3	20.6	5.16	at5g28050	23.2	nucleotide metabolism.degradation
+	1.481	0.0330369	-1.0002	I1M712	Oxygen-evolving enhancer protein 2	31	4	28.6	7.87	at1g06680	1.1.1.2	PS.lightreaction.photosystem II.PSII polypeptide subunits
+	1.80718	0.0155889	-1.00177	C6T7J2	Uncharacterized protein	12	3	25.1	9.01	at5g22360	31.4	cell.vesicle transport
+	1.8393	0.0144778	-1.00487	C6TFS5	Cytochrome b6-f complex iron-sulfur subunit (EC 7.1.1.6)	32	5	28.4	8.79	at4g03280	1.1.3	PS.lightreaction.cytochrome b6/f
+	1.92105	0.0119937	-1.00551	K7MPZ4	dUTPase domain-containing protein	43	3	15.7	5.53	at3g46940	23.5.5	nucleotide metabolism.deoxynucleotide metabolism.dUTP diphosphatase
+	3.11432	0.00076857	-1.01278	A0A0R4J339	Uncharacterized protein	18	6	82.3	8.54	at5g67360	29.5.1	protein.degradation.subtilases
+	1.81777	0.0152136	-1.01356	I1J4L0	Uncharacterized protein	5	2	58.2	8.65	unknown	unknown	unknown
+	2.10454	0.00786067	-1.01384	K7LQ40	Pyr_redox_2 domain-containing protein	9	2	39.4	8.54	at3g44190	35.1	not assigned.no ontology
+	1.65007	0.0223836	-1.02246	C6SYE7	Bet_v_1 domain-containing protein	55	6	17.6	6.52	at1g70890	20.2.99	stress.abiotic.unspecified
+	1.78183	0.0165259	-1.03315	I1KB60	Uncharacterized protein	10	2	60	5.22	at5g05180	35.2	not assigned.unknown
+	4.22593	5.94382e-05	-1.03447	I1JY06	Uncharacterized protein	33	17	91.7	5.31	at5g64030	20.2.3	stress.abiotic.drought/salt
+	1.38213	0.0414826	-1.0388	C6T1T3	Uncharacterized protein	35	4	22.4	6.07	at3g48940	27.3.99	RNA.regulation of transcription.unclassified
+	2.95314	0.00111393	-1.04867	I1MBC5	Asparagine synthetase [glutamine-hydrolyzing] (EC 6.3.5.4)	57	21	65.5	6.47	at3g47340	13.1.3.1.1	amino acid metabolism.synthesis.aspartate family.asparagine.asparagine synthetase
+	1.95397	0.0111181	-1.05159	I1M9W9	Uncharacterized protein	4	2	107	7.27	at5g24810	35.1.1	not assigned.no ontology.ABC1 family protein
+	2.60932	0.00245855	-1.05624	K7KRR7	X8 domain-containing protein	10	3	54.4	5.97	at5g56590	26.4.1	misc.beta 1,3 glucan hydrolases.glucan endo-1,3-beta-glucosidase
+	1.41177	0.0387466	-1.06011	C6THA9	NAD(P)-bd_dom domain-containing protein	51	11	39.1	8.13	at2g28760	10.1.5	cell wall.precursor synthesis.UXS
+	3.00529	0.000987902	-1.06589	C6SYL5	SHSP domain-containing protein	20	2	22.2	6.21	at5g54660	20.2.1	stress.abiotic.heat
+	2.2097	0.00617025	-1.06601	C6TDC0	Uncharacterized protein	11	3	37	6.18	at4g37000	20.1	stress.biotic
+	2.07346	0.00844392	-1.07026	I1KQC0	Uncharacterized protein	15	6	68.8	8.95	at1g24764	31.1	cell.organisation
+	1.84582	0.0142619	-1.07527	I1LU76	Peroxidase (EC 1.11.1.7)	32	7	35.8	8.22	at4g11290	26.12	misc.peroxidases
+	3.04795	0.000895473	-1.07837	C6ZS11	Leucine-rich repeat resistance protein-like protein	12	3	37.1	8.38	at5g61240	20.1	stress.biotic
+	1.42955	0.037192	-1.08297	I1L8V8	Uncharacterized protein	45	5	17.7	8.7	at2g37190	29.2.1.2.2.12	protein.synthesis.ribosomal protein.eukaryotic.60S subunit.L12
+	2.42973	0.00371768	-1.10057	I1M3S8	Uncharacterized protein	4	3	85.7	5.12	at4g03560	34.21	transport.calcium
+	2.28214	0.0052223	-1.10572	K7L413	Hexosyltransferase (EC 2.4.1.-)	6	3	75.9	8.92	at5g47780	26.2	misc.UDP glucosyl and glucoronyl transferases
+	2.38689	0.00410312	-1.10792	I1MTR7	DUF4005 domain-containing protein	14	6	65	9.47	at1g74690	30.3	signalling.calcium
+	4.36158	4.34926e-05	-1.10977	A0A0R0J569	Uncharacterized protein	13	3	46	7.78	at1g17370	27.1.1	RNA.processing.splicing
+	1.49041	0.0323288	-1.11149	C6T8W8	PsbP domain-containing protein	11	2	28.4	7.87	at1g06680	1.1.1.2	PS.lightreaction.photosystem II.PSII polypeptide subunits
+	1.53967	0.0288625	-1.11321	A0A0R0GF09	Uncharacterized protein	5	2	76.1	5.29	at1g55930	35.1	not assigned.no ontology
+	1.88057	0.0131653	-1.11795	I1KZH4	FKS1_dom1 domain-containing protein	2	3	225.6	9.09	at5g13000	3.6	minor CHO metabolism.callose
+	1.77446	0.016809	-1.12187	I1NHP0	Uncharacterized protein	16	9	117.7	6.87	at5g16300	35.2	not assigned.unknown
+	2.77341	0.00168496	-1.12946	A0A0R0IA82	Peptidase A1 domain-containing protein	14	3	52.8	5.35	at3g18490	27.3.99	RNA.regulation of transcription.unclassified
+	1.8852	0.0130257	-1.13188	I1LSM1	Phytocyanin domain-containing protein	20	3	22.8	6.92	at3g20570	26.19	misc.plastocyanin-like
+	2.09117	0.00810635	-1.13386	I1NIY9	Mitochondrial Rho GTPase (EC 3.6.5.-)	43	16	71.9	5.54	at5g27540	30.5	signalling.G-proteins
+	1.31007	0.0489695	-1.13802	C6THI3	PKS_ER domain-containing protein	58	12	39.1	6.84	at4g37980	16.2.1.10	secondary metabolism.phenylpropanoids.lignin biosynthesis.CAD
+	2.94192	0.00114308	-1.14582	C6TNI2	Lipase_3 domain-containing protein	13	4	55	8.13	at5g42930	35.1	not assigned.no ontology
+	1.65296	0.0222349	-1.14592	C6SVL0	Uncharacterized protein	47	6	21.8	5.33	at1g73260	20.1.7.6.1	stress.biotic.PR-proteins.proteinase inhibitors.trypsin inhibitor
+	1.68391	0.0207057	-1.14882	I1KG57	Uncharacterized protein	32	9	46.6	5.88	at3g21190	35.2	not assigned.unknown
+	1.86151	0.0137559	-1.1492	I1JBJ9	Endoglucanase (EC 3.2.1.4)	8	2	56.6	9.22	at4g02290	26.3.4	misc.gluco-, galacto- and mannosidases.endoglucanase
+	2.1641	0.00685338	-1.1507	I1KVS6	D-3-phosphoglycerate dehydrogenase (EC 1.1.1.95)	34	12	66	6.9	at1g17745	13.1.5.1.1	amino acid metabolism.synthesis.serine-glycine-cysteine group.serine.phosphoglycerate dehydrogenase
+	3.04815	0.000895056	-1.15529	A0A0R0L0K1	Uncharacterized protein	10	4	62.4	9.07	at1g66150	30.2.9	signalling.receptor kinases.leucine rich repeat IX
+	1.87714	0.0132697	-1.1569	I1M9S1	Plasma membrane ATPase (EC 7.1.2.1)	32	22	104.6	7.21	at2g24520	34.1	transport.p- and v-ATPases
+	2.978	0.00105196	-1.16546	I1MCZ5	LEA_2 domain-containing protein	12	2	27.9	10.27	at1g17620	35.2	not assigned.unknown
+	1.72453	0.0188567	-1.16617	I1ND63	LRRNT_2 domain-containing protein	21	7	50.3	8.05	at1g49750	35.1	not assigned.no ontology
+	1.50586	0.0311988	-1.16737	I1KYQ1	Glycosyltransferase (EC 2.4.1.-)	7	2	51.5	5.92	at4g01070	16.8.3	secondary metabolism.flavonoids.dihydroflavonols
+	1.5797	0.0263207	-1.16826	I1L3X9	Sucrose synthase (EC 2.4.1.13)	11	6	104.1	7.06	at1g73370	2.2.1.5	major CHO metabolism.degradation.sucrose.Susy
+	1.30836	0.0491627	-1.18129	I1LDH2	Tr-type G domain-containing protein	9	8	147	5.3	at1g76810	29.2.3	protein.synthesis.initiation
+	1.36398	0.0432529	-1.18526	C6TGB4	Uncharacterized protein	12	2	29.9	9.28	at3g59500	35.1	not assigned.no ontology
+	2.06074	0.00869481	-1.19011	A0A0R0GA40	Uncharacterized protein	13	3	50.8	6.01	at3g16850	10.6.3	cell wall.degradation.pectate lyases and polygalacturonases
+	1.96216	0.0109104	-1.1996	I1JWW4	Uncharacterized protein	12	2	31.1	5.12	at5g62500	31.1	cell.organisation
+	3.79301	0.00016106	-1.22329	B0M194	Peroxisomal 3-hydroxyacyl-CoA dehydrogenase-like protein	12	2	35	9.45	at3g15290	24.3	Biodegradation of Xenobiotics.3-hydroxybutyryl-CoA dehydrogenase
+	2.23675	0.00579763	-1.23179	I1K510	Uncharacterized protein	18	8	93.7	5.17	at5g64030	20.2.3	stress.abiotic.drought/salt
+	2.33235	0.00465206	-1.24889	C6SX14	Ferredoxin	49	3	16.5	6.89	at2g27510	7.3	OPP.electron transfer
+	2.61686	0.00241626	-1.25349	A0A0R0KYU7	Xyloglucan endotransglucosylase/hydrolase (EC 2.4.1.207)	29	8	36	8.25	at5g13870	10.7	cell wall.modification
+	1.87207	0.0134254	-1.2553	K7MK51	Uncharacterized protein	7	4	87.6	6.98	at4g30020	29.5.1	protein.degradation.subtilases
+	2.10655	0.00782444	-1.25745	A0A0R4J2V8	Dirigent protein	28	3	23.9	6.28	at3g13650	20.1.7	stress.biotic.PR-proteins
+	2.15232	0.00704174	-1.26301	I1MJP8	Cellulose synthase (EC 2.4.1.12)	17	10	119.9	7.02	at5g05170	10.2.1	cell wall.cellulose synthesis.cellulose synthase
+	1.78	0.0165957	-1.26425	I1K702	PLCXc domain-containing protein	26	5	36.2	8.02	at4g38690	11.9.3	lipid metabolism.lipid degradation.lysophospholipases
+	3.35979	0.000436728	-1.2725	K7KCU6	Protein kinase domain-containing protein	6	3	92	8.16	at3g51740	17.3.2.1	hormone metabolism.brassinosteroid.signal transduction.BRI
+	1.45863	0.0347829	-1.27586	A0A0R0LFB4	Dihydrolipoamide acetyltransferase component of pyruvate dehydrogenase complex (EC 2.3.1.-)	21	8	47.9	8.7	at3g25860	11.1.31	lipid metabolism.FA synthesis and FA elongation.pyruvate DH
+	3.46112	0.000345842	-1.2815	K7KZ57	Uncharacterized protein	5	2	51.6	6.42	at5g48930	16.2.1.4	secondary metabolism.phenylpropanoids.lignin biosynthesis.HCT
+	2.36486	0.00431663	-1.29015	A8HTK0	Thioredoxin	51	4	13.3	5.53	at3g51030	21.1	redox.thioredoxin
+	1.43799	0.036476	-1.29073	K7LJA2	Uncharacterized protein	8	2	51.2	6.02	at3g62110	10.6.3	cell wall.degradation.pectate lyases and polygalacturonases
+	1.35035	0.0446328	-1.29074	C6TGT5	Uncharacterized protein	9	2	37.7	7.03	at5g54370	33.2	development.late embryogenesis abundant
+	3.27794	0.000527302	-1.30048	I1KD34	COBRA-like protein	14	3	50.7	8.6	at5g60920	10.2.2	cell wall.cellulose synthesis.COBRA
+	2.09418	0.00805045	-1.30106	A0A0R0KSI5	TPR_REGION domain-containing protein	7	3	37.7	8.73	at2g37400	35.1	not assigned.no ontology
+	2.36178	0.00434732	-1.3121	A0A0R0JAB1	Auxin efflux carrier component	4	2	60.7	7.06	at1g70940	17.2.2	hormone metabolism.auxin.signal transduction
+	2.09509	0.00803354	-1.32066	C6SVM4	Uncharacterized protein	35	4	22.3	5.82	at3g48940	27.3.99	RNA.regulation of transcription.unclassified
+	2.20903	0.00617978	-1.32534	A0A0R0K0E5	FAD-binding PCMH-type domain-containing protein	10	4	59.2	7.85	at4g20820	26.8	misc.nitrilases, *nitrile lyases, berberine bridge enzymes, reticuline oxidases, troponine reductases
+	3.72368	0.000188938	-1.33877	I1MBL5	Uncharacterized protein	40	15	57.9	8.75	at2g30490	16.2.1.2	secondary metabolism.phenylpropanoids.lignin biosynthesis.C4H
+	2.40528	0.00393294	-1.34137	A0A0R0JPK0	AAA domain-containing protein	5	4	133.9	6.65	at4g02480	29.5.9	protein.degradation.AAA type
+	4.39785	4.00087e-05	-1.34991	I1KSC1	Uncharacterized protein	11	5	66.5	8.19	at4g08810	35.2	not assigned.unknown
+	1.60388	0.0248957	-1.35041	I1LCX5	Uncharacterized protein	8	3	67.3	6.49	at3g54860	29.3.4.3	protein.targeting.secretory pathway.vacuole
+	1.39697	0.0400897	-1.35407	A0A0R0FND6	Elongation factor G, chloroplastic (cEF-G)	10	4	86.8	5.77	at1g62750	29.2.4	protein.synthesis.elongation
+	2.52892	0.00295855	-1.35869	I1M9K9	Uncharacterized protein	25	8	39.8	7.74	at5g11420	35.2	not assigned.unknown
+	4.14429	7.17321e-05	-1.3613	C6ZRR4	NAK-type protein kinase	8	5	102.2	6.34	at1g66150	30.2.9	signalling.receptor kinases.leucine rich repeat IX
+	1.35816	0.043837	-1.36307	I1KWE5	RRM domain-containing protein	10	2	26.2	4.86	at5g61030	27.4	RNA.RNA binding
+	1.47557	0.0334523	-1.3646	Q9SWB5	Seed maturation protein PM37	43	12	46.3	6.28	at5g22060	20.2.1	stress.abiotic.heat
+	1.7727	0.016877	-1.38189	K7N361	Lipase	11	3	49.2	7.23	at2g15230	11.9.2.1	lipid metabolism.lipid degradation.lipases.triacylglycerol lipase
+	3.50222	0.000314617	-1.39233	I1LA99	Uncharacterized protein	10	4	86.2	5.92	at2g41770	35.2	not assigned.unknown
+	1.41884	0.0381203	-1.39359	C6SZA9	Bet_v_1 domain-containing protein	44	6	17.1	5.25	at1g24020	20.2.99	stress.abiotic.unspecified
+	1.69247	0.0203017	-1.39463	Q2MJR4	Myo-inositol-1-phosphate synthase	40	9	56.4	5.67	at5g10170	3.4.3	minor CHO metabolism.myo-inositol.InsP Synthases
+	3.03449	0.00092366	-1.39843	C6TMX0	Xyloglucan endotransglucosylase/hydrolase (EC 2.4.1.207)	31	8	34.4	8.95	at5g13870	10.7	cell wall.modification
+	1.6079	0.0246661	-1.39862	C6TD35	PABS domain-containing protein	9	2	37	5.4	at1g23820	22.1.6	polyamine metabolism.synthesis.spermidine synthase
+	2.39032	0.00407081	-1.40817	K7M8I6	Uncharacterized protein	6	3	60.9	6.55	at1g76040	30.3	signalling.calcium
+	1.37237	0.0424261	-1.40946	K7N057	Hexosyltransferase (EC 2.4.1.-)	10	3	61.8	8.21	at5g18480	35.1	not assigned.no ontology
+	1.74232	0.0181001	-1.40999	I1JG92	Uncharacterized protein	12	5	86.3	6.23	at2g41770	35.2	not assigned.unknown
+	3.81728	0.000152308	-1.41301	I1N4W1	PMR5N domain-containing protein	24	6	51.3	8.51	at5g15900	35.2	not assigned.unknown
+	3.03548	0.000921561	-1.42383	K7KQQ0	Uncharacterized protein	13	2	30.8	7.28	at1g77700	20.1	stress.biotic
+	1.65899	0.0219285	-1.42498	C6TM76	DUF1279 domain-containing protein	15	2	20.6	9.32	at2g27290	35.2	not assigned.unknown
+	1.77047	0.016964	-1.4378	I1N6I1	Hexosyltransferase (EC 2.4.1.-)	8	3	63.1	8.48	at3g02350	26.2	misc.UDP glucosyl and glucoronyl transferases
+	3.6616	0.00021797	-1.45128	C6T736	V-SNARE domain-containing protein	42	6	24.7	9.5	at3g29100	31.4	cell.vesicle transport
+	2.39486	0.00402844	-1.46605	I1MS92	Uncharacterized protein	5	2	55	8.28	at1g19170	10.6.3	cell wall.degradation.pectate lyases and polygalacturonases
+	2.64225	0.00227904	-1.46637	I1L3E3	Uncharacterized protein	6	2	39.4	9.48	at5g52060	20.2	stress.abiotic
+	2.29568	0.00506198	-1.4795	I1L546	NmrA domain-containing protein	11	2	35.6	6.62	at1g32100	16.2	secondary metabolism.phenylpropanoids
+	2.64082	0.00228657	-1.49299	A0A0R0IYY7	Uncharacterized protein	51	19	59	8.65	at5g07990	16.8.3.3	secondary metabolism.flavonoids.dihydroflavonols.flavonoid 3''-monooxygenase
+	2.50509	0.00312545	-1.49408	K7LP97	RRM domain-containing protein	42	5	16.9	8.12	at2g21660	27.4	RNA.RNA binding
+	1.48864	0.0324612	-1.49796	C6SXA1	CS domain-containing protein	41	3	19.4	4.55	at4g02450	35.1.40	not assigned.no ontology.glycine rich proteins
+	2.22388	0.00597194	-1.50017	I1L0Z7	Uncharacterized protein	6	6	168.3	7.47	at2g47800	34.16	transport.ABC transporters and multidrug resistance systems
+	2.61283	0.00243876	-1.50471	I1KEH1	Phytocyanin domain-containing protein	20	3	23.2	7.87	at3g20570	26.19	misc.plastocyanin-like
+	2.01737	0.00960801	-1.51436	K7KPK3	Uncharacterized protein	28	11	73	4.3	at4g37820	35.1	not assigned.no ontology
+	3.35922	0.000437298	-1.51669	I1JUE0	Cellulose synthase (EC 2.4.1.12)	28	19	122	6.76	at4g32410	10.2.1	cell wall.cellulose synthesis.cellulose synthase
+	2.71843	0.00191238	-1.53134	I1JT65	Uncharacterized protein	18	4	40.1	6.37	at4g39090	29.5.3	protein.degradation.cysteine protease
+	1.40918	0.0389781	-1.54101	A0A0R4J645	Uncharacterized protein	9	2	41.6	5.45	at5g54160	16.2.1.9	secondary metabolism.phenylpropanoids.lignin biosynthesis.COMT
+	1.95637	0.0110568	-1.55231	C6SYN8	Uncharacterized protein	24	2	15.5	7.96	at1g19530	35.2	not assigned.unknown
+	2.77308	0.00168625	-1.56132	I1LL85	Uncharacterized protein	5	2	60.7	8.48	at3g08550	17.1.2	hormone metabolism.abscisic acid.signal transduction
+	1.37689	0.0419862	-1.56157	I1NII6	IPPc domain-containing protein	2	2	127.2	6.47	at1g65580	28.1	DNA.synthesis/chromatin structure
+	1.84498	0.0142895	-1.56663	C6TA63	Uncharacterized protein (Fragment)	7	2	47.8	7.42	at4g14950	35.2	not assigned.unknown
+	2.698	0.00200447	-1.57685	I1JXR7	Exostosin domain-containing protein	12	3	47.1	6.65	at5g61840	26.2	misc.UDP glucosyl and glucoronyl transferases
+	3.09895	0.000796246	-1.57688	Q06765	ADR6 protein (Sali5-4a protein)	52	8	30.4	6.84	at5g25610	20.2.3	stress.abiotic.drought/salt
+	1.8313	0.0147468	-1.58004	I1KNV8	Uncharacterized protein	14	7	95.1	5.14	at5g64030	20.2.3	stress.abiotic.drought/salt
+	2.94528	0.00113429	-1.59542	K7LCZ8	Cellulose synthase (EC 2.4.1.12)	20	11	120.1	7.39	at5g05170	10.2.1	cell wall.cellulose synthesis.cellulose synthase
+	2.19089	0.00644331	-1.59606	I1LZW4	Tr-type G domain-containing protein	16	11	109.9	5.24	at1g06220	29.2.4	protein.synthesis.elongation
+	2.40718	0.00391583	-1.62049	I1LCV9	Carboxypeptidase (EC 3.4.16.-)	16	6	56	5.38	at3g10410	29.5.5	protein.degradation.serine protease
+	1.55301	0.027989	-1.62432	K7K6S5	AB hydrolase-1 domain-containing protein	16	2	29.3	5.6	at2g23620	26.8	misc.nitrilases, *nitrile lyases, berberine bridge enzymes, reticuline oxidases, troponine reductases
+	1.37667	0.042008	-1.63107	I1L7W1	Uncharacterized protein	4	4	167.6	8.15	at2g47800	34.16	transport.ABC transporters and multidrug resistance systems
+	2.3473	0.00449466	-1.65364	I1MUR9	GMC_OxRdtase_N domain-containing protein	6	3	62.9	6.84	at1g12570	35.1	not assigned.no ontology
+	1.44949	0.0355234	-1.65896	A0A0R0JQU1	Uncharacterized protein	34	5	32.9	4.93	at5g50250	27.4	RNA.RNA binding
+	1.79181	0.0161505	-1.66703	A0A0R0INP8	Peroxidase (EC 1.11.1.7)	29	7	34.5	8.9	at5g64120	26.12	misc.peroxidases
+	3.24574	0.000567886	-1.68032	I1KRB5	FAD-binding PCMH-type domain-containing protein	33	12	58.8	8.7	at1g30760	26.8	misc.nitrilases, *nitrile lyases, berberine bridge enzymes, reticuline oxidases, troponine reductases
+	1.88906	0.0129104	-1.6901	Q2LAL0	Cytochrome P450 monooxygenase CYP81E11	22	6	57.9	8.91	at4g37340	26.1	misc.cytochrome P450
+	1.37725	0.0419516	-1.69748	I1MLV5	Fe2OG dioxygenase domain-containing protein	32	7	35.8	5.69	at1g52790	26.14	misc.oxygenases
+	3.39973	0.000398352	-1.70552	I1LDY8	Uncharacterized protein	23	5	52.1	7.8	at3g22890	14.1	S-assimilation.APS
+	2.65235	0.00222662	-1.71298	I1J7C0	Uncharacterized protein	11	2	37.3	4.88	at5g17620	35.2	not assigned.unknown
+	3.64057	0.000228787	-1.73896	I1KTE1	Cellulose synthase (EC 2.4.1.12)	12	8	123.9	6.93	at5g64740	10.2.1	cell wall.cellulose synthesis.cellulose synthase
+	1.98067	0.010455	-1.75251	A0A0R0K0I4	X8 domain-containing protein	6	2	62.3	6.13	at2g01630	26.4.1	misc.beta 1,3 glucan hydrolases.glucan endo-1,3-beta-glucosidase
+	3.79836	0.00015909	-1.75691	A0A0R0FVX1	Uncharacterized protein	32	12	58.6	7.37	at5g07990	16.8.3.3	secondary metabolism.flavonoids.dihydroflavonols.flavonoid 3''-monooxygenase
+	1.54581	0.0284573	-1.80498	I1JTX2	Uncharacterized protein	16	3	28.2	9.83	at5g11890	35.2	not assigned.unknown
+	2.69947	0.0019977	-1.85759	I1JIW7	Uncharacterized protein	30	7	24.9	9.42	at5g11150	31.4	cell.vesicle transport
+	2.72063	0.00190269	-1.87655	A0A0R0EUW6	Uncharacterized protein	9	3	57.6	8.38	at2g40890	26.1	misc.cytochrome P450
+	1.94473	0.0113572	-1.92045	C6SZ34	Uncharacterized protein (Fragment)	9	2	23.8	6.61	at2g32580	35.2	not assigned.unknown
+	3.5574	0.000277079	-1.92378	I1LJ10	Peptidyl-prolyl cis-trans isomerase (PPIase) (EC 5.2.1.8)	11	2	26.1	7.34	at4g34960	31.3.1	cell.cycle.peptidylprolyl isomerase
+	1.45309	0.0352299	-1.92617	I1K2X6	FAD-binding PCMH-type domain-containing protein	30	11	59.5	9.03	at1g30760	26.8	misc.nitrilases, *nitrile lyases, berberine bridge enzymes, reticuline oxidases, troponine reductases
+	1.88922	0.0129058	-1.9269	A0A0R0EHS8	PMR5N domain-containing protein	33	3	20.5	8.31	at5g15900	35.2	not assigned.unknown
+	1.56491	0.0272328	-1.9454	K7M4N7	Uncharacterized protein	4	2	65.1	8.12	at1g06560	35.1	not assigned.no ontology
+	4.30656	4.9367e-05	-1.95049	I1LHJ6	SHNi-TPR domain-containing protein	23	6	50.1	4.54	at4g37210	35.1.5	not assigned.no ontology.pentatricopeptide (PPR) repeat-containing protein
+	3.30076	0.000500315	-1.95394	Q8S564	4-coumarate:coenzyme A ligase (EC 6.2.1.12)	26	9	59.3	5.91	at3g21240	16.2.1.3	secondary metabolism.phenylpropanoids.lignin biosynthesis.4CL
+	1.75105	0.0177397	-1.95685	I1K8W4	Cellulose synthase (EC 2.4.1.12)	28	18	122	6.76	at4g32410	10.2.1	cell wall.cellulose synthesis.cellulose synthase
+	4.29117	5.11477e-05	-1.9569	I1JWM6	COBRA-like protein	10	2	50.6	8.68	at5g60920	10.2.2	cell wall.cellulose synthesis.COBRA
+	1.49	0.0323593	-1.96425	A0A0R0FEC7	Lipase_3 domain-containing protein	7	2	54.3	5.96	at5g67050	11.9.2.1	lipid metabolism.lipid degradation.lipases.triacylglycerol lipase
+	1.40166	0.0396589	-1.98406	C6TN54	Uncharacterized protein	10	2	47.1	7.08	at5g22060	20.2.1	stress.abiotic.heat
+	4.94146	1.14431e-05	-1.98671	I1K3A6	Uncharacterized protein	10	4	64.3	6.57	at2g02040	34.3	transport.amino acids
+	1.63967	0.022926	-2.00665	K7KEZ6	Uncharacterized protein	6	2	78.8	5.31	at2g42320	28.1	DNA.synthesis/chromatin structure
+	2.12425	0.00751199	-2.04072	C6TNZ5	Uncharacterized protein	12	2	33	6.35	at1g68290	28.1	DNA.synthesis/chromatin structure
+	2.52142	0.00301008	-2.04545	A8C8H5	Glutamate decarboxylase (EC 4.1.1.15)	59	19	57.2	5.82	at2g02010	13.1.1.1.1	amino acid metabolism.synthesis.central amino acid metabolism.GABA.Glutamate decarboxylase
+	3.41051	0.000388587	-2.0668	I1MY41	Uncharacterized protein	13	5	61.3	6.65	at1g20080	35.1.19	not assigned.no ontology.C2 domain-containing protein
+	2.05786	0.0087526	-2.06979	I1ND18	Uncharacterized protein	9	3	73.8	6.83	at1g49430	11.1.9	lipid metabolism.FA synthesis and FA elongation.long chain fatty acid CoA ligase
+	2.39219	0.00405335	-2.0736	I1J7C7	RanBD1 domain-containing protein	21	3	25.6	4.72	at5g58590	30.5	signalling.G-proteins
+	2.35829	0.00438239	-2.07436	A0A024FRX1	Glycosyltransferase (EC 2.4.1.-)	10	3	52.2	6.14	at3g16520	26.2	misc.UDP glucosyl and glucoronyl transferases
+	1.35265	0.0443963	-2.08128	I1K6B1	NAB domain-containing protein	5	4	139.4	4.94	at5g41790	30.11.1	signalling.light.COP9 signalosome
+	3.74332	0.000180585	-2.10169	I1MWI1	zinc_ribbon_10 domain-containing protein	9	2	44.8	8.84	at4g31080	35.2	not assigned.unknown
+	3.56912	0.000269697	-2.11154	I1N843	Glyceraldehyde-3-phosphate dehydrogenase (EC 1.2.1.-)	47	14	43.2	8.25	at1g12900	1.3.4	PS.calvin cyle.GAP
+	1.55613	0.0277886	-2.1141	K7L4Y5	Pectinesterase (EC 3.1.1.11)	5	2	57.8	8.68	at1g23200	10.8.99	cell wall.pectin*esterases.misc
+	1.84674	0.0142317	-2.11602	I1LM80	Sucrose synthase (EC 2.4.1.13)	5	3	95.7	6.99	at1g73370	2.2.1.5	major CHO metabolism.degradation.sucrose.Susy
+	1.51975	0.0302169	-2.12512	C6TIQ7	Cytochrome c domain-containing protein	48	8	33.6	6.95	at5g40810	9.6	mitochondrial electron transport / ATP synthesis.cytochrome c
+	1.49943	0.0316642	-2.14675	I1M4H1	Carboxypeptidase (EC 3.4.16.-)	11	3	56.4	5.74	at3g45010	29.5	protein.degradation
+	3.39852	0.000399466	-2.14733	C6SZQ8	Phytocyanin domain-containing protein	24	2	17.3	6.76	at1g72230	26.19	misc.plastocyanin-like
+	2.56222	0.00274017	-2.15706	A0A0R0F859	Epimerase domain-containing protein	28	6	35.1	5.83	at5g58490	16.2.1.7	secondary metabolism.phenylpropanoids.lignin biosynthesis.CCR1
+	1.97179	0.0106711	-2.18172	A0A0R0G7V6	Uncharacterized protein	5	2	62.8	6.99	at4g21760	26.3	misc.gluco-, galacto- and mannosidases
+	2.12771	0.00745231	-2.18656	I1MXX3	Uncharacterized protein	21	2	16.5	9.31	at1g19530	35.2	not assigned.unknown
+	1.80466	0.0156798	-2.19959	I1JBJ2	Uncharacterized protein	45	11	50.2	6.99	at5g50950	8.1.8	TCA / org. transformation.TCA.fumarase
+	1.40688	0.0391853	-2.2028	I1KNP5	Endoglucanase (EC 3.2.1.4)	9	4	68.7	8.72	at5g49720	10.2	cell wall.cellulose synthesis
+	2.90856	0.00123434	-2.20432	A0A0R0HPC7	Pectate lyase (EC 4.2.2.2)	5	2	42.1	8.09	at3g55140	10.6.3	cell wall.degradation.pectate lyases and polygalacturonases
+	1.47082	0.0338204	-2.21787	K7MAF0	Lipase_GDSL domain-containing protein	8	2	41.3	5.91	at1g29670	26.28	misc.GDSL-motif lipase
+	4.21763	6.0586e-05	-2.23448	I1NAW5	Uncharacterized protein	15	3	50.5	6.71	at2g35860	35.1	not assigned.no ontology
+	2.71298	0.00193653	-2.23688	I1L0J1	Uncharacterized protein	5	2	52.9	5.16	at1g30690	34.99	transport.misc
+	2.08086	0.00830125	-2.24698	Q6Q2Z8	Phosphoenolpyruvate carboxylase (EC 4.1.1.31)	31	23	110.5	6.42	at2g42600	4.1.16	glycolysis.cytosolic branch.phospho-enol-pyruvate carboxylase (PEPC)
+	3.04864	0.000894046	-2.25614	I1JY96	Protein kinase domain-containing protein	6	3	113.6	7.11	at5g10020	30.2.3	signalling.receptor kinases.leucine rich repeat III
+	1.49853	0.0317297	-2.26462	C6TF22	Uncharacterized protein	14	3	39.5	4.91	at3g60830	31.1	cell.organisation
+	1.74282	0.0180792	-2.28183	I1MVV4	Uncharacterized protein	3	2	125.9	5.22	at2g23360	35.1	not assigned.no ontology
+	2.52853	0.00296123	-2.2828	I1JN04	Uncharacterized protein	11	4	57.7	8.53	at2g40890	26.1	misc.cytochrome P450
+	1.54298	0.0286432	-2.31659	A0A0R0LFG1	Uncharacterized protein	4	2	118.6	6.55	at1g26170	29.3.1	protein.targeting.nucleus
+	1.8873	0.012963	-2.34071	Q2LAL4	Cytochrome P450 monooxygenase CYP83E8	38	13	57.4	7.96	at4g31500	16.5.1.1.4.1	secondary metabolism.sulfur-containing.glucosinolates.synthesis.shared.CYP83B1 phenylacetaldoxime monooxygenase
+	2.08722	0.00818048	-2.3421	I1LRM9	Uncharacterized protein	12	2	50.4	7.08	at2g35860	35.1	not assigned.no ontology
+	1.75655	0.0175168	-2.34265	A0A0R0HZ32	Uncharacterized protein	13	2	20	5.3	at1g02816	35.2	not assigned.unknown
+	1.32743	0.0470509	-2.36204	I1KRH0	AAA domain-containing protein	9	2	45.4	6.29	at2g34560	31.1	cell.organisation
+	2.67763	0.00210074	-2.37708	I1JNM0	PMR5N domain-containing protein	9	2	70.1	8.43	at5g06700	35.2	not assigned.unknown
+	3.77889	0.000166384	-2.39481	I1MMC2	t-SNARE coiled-coil homology domain-containing protein	18	3	30	6.32	at5g46860	31.4	cell.vesicle transport
+	2.40651	0.00392183	-2.43076	Q9XFI6	Peroxidase (EC 1.11.1.7)	23	5	37.4	8.35	at4g21960	26.12	misc.peroxidases
+	1.43514	0.0367164	-2.45068	A0A024FRL5	Glycosyltransferase (EC 2.4.1.-)	8	2	52	5.92	at3g16520	26.2	misc.UDP glucosyl and glucoronyl transferases
+	1.39432	0.0403347	-2.4594	I1M3B6	Uncharacterized protein	3	2	131.6	7.34	at4g27430	31.1	cell.organisation
+	3.41954	0.000380589	-2.46544	A0A0R0I5R9	Uncharacterized protein	38	12	48	6.52	at1g64660	13.2.3.4.1	amino acid metabolism.degradation.aspartate family.methionine.methionine gamma-lyase
+	4.08407	8.2401e-05	-2.54437	I1KZ04	Cytochrome b561 and DOMON domain-containing protein	13	3	43.2	9.38	at3g25290	17.2.3	hormone metabolism.auxin.induced-regulated-responsive-activated
+	2.5265	0.00297511	-2.54726	I1K6Q2	Uncharacterized protein	12	3	48.3	5.78	at5g41040	35.1	not assigned.no ontology
+	1.36721	0.0429333	-2.55717	K7N525	ATP-grasp domain-containing protein	13	5	68.6	6.83	at2g37690	23.1.2.6	nucleotide metabolism.synthesis.purine.AIR carboxylase
+	2.37858	0.00418238	-2.56293	A0A0R0L0I9	HTH myb-type domain-containing protein	2	2	46.7	6.84	at3g04030	27.3.20	RNA.regulation of transcription.G2-like transcription factor family, GARP
+	2.0457	0.00900125	-2.56306	A0A0R0JLI3	Epimerase domain-containing protein	7	2	36.6	8.54	at4g33360	16.8.3	secondary metabolism.flavonoids.dihydroflavonols
+	3.86988	0.000134935	-2.59548	C6T8K0	LEA_2 domain-containing protein	19	4	34.2	9.94	at1g45688	35.2	not assigned.unknown
+	3.19017	0.000645408	-2.62277	C6T3V3	Glutathione peroxidase	18	3	19.1	9.61	at2g48150	21.2.2	redox.ascorbate and glutathione.glutathione
+	2.35065	0.0044602	-2.62344	I1L158	Cellulose synthase (EC 2.4.1.12)	6	3	119.2	7.62	at5g44030	10.2.1	cell wall.cellulose synthesis.cellulose synthase
+	3.74739	0.000178898	-2.63053	I1KWS8	Glyco_hydro_19_cat domain-containing protein	10	2	36	6.27	at1g05850	20.1	stress.biotic
+	2.84316	0.00143495	-2.63491	K7M1F7	Lipase_GDSL domain-containing protein	8	2	40.5	7.91	at5g45950	26.28	misc.GDSL-motif lipase
+	1.93314	0.0116642	-2.63501	I1KH95	Uncharacterized protein	5	2	93	8.76	at3g13990	35.1.41	not assigned.no ontology.hydroxyproline rich proteins
+	2.03136	0.0093034	-2.63608	I1KW02	BURP domain-containing protein	12	2	30.2	7.94	at5g25610	20.2.3	stress.abiotic.drought/salt
+	4.38609	4.11065e-05	-2.69386	C6TK45	Uncharacterized protein	8	2	43.8	8.46	at3g12120	11.2.4	lipid metabolism.FA desaturation.omega 6 desaturase
+	2.55812	0.00276618	-2.69721	C6TEQ7	Lipase_GDSL domain-containing protein	15	2	37.8	7.85	at3g16370	26.28	misc.GDSL-motif lipase
+	1.43205	0.0369787	-2.70709	I1ML02	Uncharacterized protein	8	4	69.9	6.62	at5g20950	10.6.1	cell wall.degradation.cellulases and beta -1,4-glucanases
+	3.37478	0.000421906	-2.71851	I1MFX5	Endoglucanase (EC 3.2.1.4)	13	6	68.3	8.66	at5g49720	10.2	cell wall.cellulose synthesis
+	1.62096	0.0239356	-2.75973	C6TL20	Lipase_GDSL domain-containing protein	31	7	40.2	6.1	at5g33370	26.28	misc.GDSL-motif lipase
+	1.31554	0.048357	-2.7866	Q43468	Hsp70-Hsp90 organizing protein 1 (GmHop-1) (Heat shock protein STI) (GmSTI) (Stress-inducible protein)	17	7	64.1	5.69	at1g62740	20	stress
+	3.37112	0.000425478	-2.79636	I1N641	Uncharacterized protein	16	14	136.1	7.99	at3g28860	34.16	transport.ABC transporters and multidrug resistance systems
+	3.5302	0.000294983	-2.84182	A0A0R0EB47	Uncharacterized protein	6	2	35.3	9.63	at3g05290	34.9	transport.metabolite transporters at the mitochondrial membrane
+	3.10503	0.000785181	-2.86616	I1JFT2	Glycosyltransferase (EC 2.4.1.-)	6	2	54.9	6.52	at1g22380	26.2	misc.UDP glucosyl and glucoronyl transferases
+	1.8472	0.0142167	-2.8832	A0A0R4J4M3	FAS1 domain-containing protein	13	2	27.8	8.88	at5g03170	10.5.1	cell wall.cell wall proteins.AGPs
+	2.89488	0.00127386	-3.00751	C6TD22	Glyco_hydro_19_cat domain-containing protein	15	3	36.4	6.51	at1g05850	20.1	stress.biotic
+	4.99147	1.01983e-05	-3.02208	C6KHU4	Phenylalanine ammonia-lyase (EC 4.3.1.24)	41	16	78.1	6.19	at2g37040	16.2.1.1	secondary metabolism.phenylpropanoids.lignin biosynthesis.PAL
+	2.37202	0.00424601	-3.03643	I1K0W4	Glutamate dehydrogenase	17	4	44.8	6.61	at5g07440	12.3.1	N-metabolism.N-degradation.glutamate dehydrogenase
+	4.57685	2.64941e-05	-3.10289	I1LWJ6	Uncharacterized protein	17	14	136	7.99	at3g28860	34.16	transport.ABC transporters and multidrug resistance systems
+	4.67171	2.12955e-05	-3.16824	I1LRC1	Uncharacterized protein	21	9	62.5	9.11	at5g22740	10.2	cell wall.cellulose synthesis
+	1.59959	0.0251428	-3.17372	I1LH27	Tubulin alpha chain	56	20	49.7	5.06	at1g50010	31.1	cell.organisation
+	4.08681	8.18829e-05	-3.17616	A0A0R4J551	Phytocyanin domain-containing protein	19	2	20.9	7.36	at1g72230	26.19	misc.plastocyanin-like
+	3.01312	0.000970248	-3.17642	A0A0R0FGJ1	Protein kinase domain-containing protein	4	2	95.1	6.23	at3g51550	30.2.16	signalling.receptor kinases.Catharanthus roseus-like RLK1
+	1.30869	0.0491257	-3.19578	I1M9G4	Uncharacterized protein	8	2	41.2	8.56	at5g25265	35.2	not assigned.unknown
+	1.76132	0.0173252	-3.26915	I1K345	AAA domain-containing protein	9	2	45.3	6.48	at2g34560	31.1	cell.organisation
+	1.65932	0.0219121	-3.30158	K7LCS5	Flavin-containing monooxygenase (EC 1.-.-.-)	6	2	59.5	7.55	at1g19250	26.7	misc.oxidases - copper, flavone etc.
+	1.82212	0.015062	-3.30516	I1K8B5	Uncharacterized protein	11	2	53.5	6.13	at4g32940	29.3.4.3	protein.targeting.secretory pathway.vacuole
+	1.59557	0.0253762	-3.31689	Q70MR6	Ornithine decarboxylase (EC 4.1.1.17)	9	2	46.4	5.49	at5g11880	13.1.3.5.5	amino acid metabolism.synthesis.aspartate family.lysine.diaminopimelate decarboxylase
+	3.0992	0.000795789	-3.39212	I1M8S3	Uncharacterized protein	36	15	82.1	7.39	at5g67360	29.5.1	protein.degradation.subtilases
+	3.59681	0.000253039	-3.39789	A0A0R0IBM9	CMP/dCMP-type deaminase domain-containing protein	19	3	20.7	5.86	at5g28050	23.2	nucleotide metabolism.degradation
+	1.50054	0.0315836	-3.44343	K7MR59	NAD(P)-bd_dom domain-containing protein	26	8	74.3	6.67	at1g78570	10.1.10	cell wall.precursor synthesis.RHM
+	1.87962	0.013194	-3.51258	I1JSP4	X8 domain-containing protein	10	2	48.3	5.16	at4g34480	35.1	not assigned.no ontology
+	2.46459	0.00343091	-3.52354	I1JIM1	WBb98N11.19 protein	5	2	64.5	6.62	at4g15420	27.1	RNA.processing
+	1.52519	0.0298405	-3.52818	A1Z0H8	D-myo-inositol 3-phosphate synthase	50	12	56.4	5.39	at5g10170	3.4.3	minor CHO metabolism.myo-inositol.InsP Synthases
+	3.1687	0.000678104	-3.54842	A0A0R4J2X1	Uncharacterized protein	8	2	44	8.34	at3g12120	11.2.4	lipid metabolism.FA desaturation.omega 6 desaturase
+	2.99897	0.00100237	-3.56811	C6T5R3	PH domain-containing protein	27	2	16.8	8.65	at5g05710	30.9	signalling.lipids
+	1.99094	0.0102107	-3.56855	I1LVS4	Uncharacterized protein	27	9	61.7	5.2	at3g21240	16.2.1.3	secondary metabolism.phenylpropanoids.lignin biosynthesis.4CL
+	2.1215	0.00755963	-3.64292	I1NHU7	Uncharacterized protein	10	2	39	6.29	at2g38680	23.2	nucleotide metabolism.degradation
+	2.58374	0.00260771	-3.69365	I1N019	Uncharacterized protein	12	4	72.2	6.25	at2g29630	18.2	Co-factor and vitamine metabolism.thiamine
+	1.5486	0.028275	-3.69724	K7K8V7	C2 domain-containing protein	2	3	229.9	5.62	at1g77460	35.1.19	not assigned.no ontology.C2 domain-containing protein
+	3.33096	0.000466699	-3.72839	A0A0R0I9A1	3-ketoacyl-CoA synthase (EC 2.3.1.-)	14	4	56.1	8.9	at1g68530	16.7	secondary metabolism.wax
+	2.96998	0.00107157	-3.74799	I1MVG7	Uncharacterized protein	23	7	76.9	4.35	at4g37820	35.1	not assigned.no ontology
+	3.46385	0.000343679	-3.767	I1K8I9	3-ketoacyl-CoA synthase (EC 2.3.1.-)	5	2	60.7	9.13	at2g26250	16.1	secondary metabolism.isoprenoids
+	2.49231	0.00321877	-3.77124	I1KX04	Phospholipid-transporting ATPase (EC 7.6.2.1)	7	3	135.8	6.93	at1g68710	27.3.35	RNA.regulation of transcription.bZIP transcription factor family
+	3.08078	0.000830273	-3.82029	I1L5J4	Uncharacterized protein	7	2	45.5	8.72	at1g70330	34.14	transport.unspecified cations
+	2.7439	0.00180344	-3.8488	C6TKJ2	Xyloglucan endotransglucosylase/hydrolase (EC 2.4.1.207)	35	7	35.6	8.37	at4g25810	10.7	cell wall.modification
+	2.0936	0.0080612	-3.85506	K7MNZ5	Uncharacterized protein	15	3	40.4	6.7	at4g39090	29.5.3	protein.degradation.cysteine protease
+	1.54396	0.0285785	-3.90017	I1M8D6	X8 domain-containing protein	7	2	51.2	5.19	at4g34480	35.1	not assigned.no ontology
+	2.717	0.00191866	-3.94704	I1KPJ3	Endoglucanase (EC 3.2.1.4)	6	3	68.7	8.72	at1g64390	26.3.4	misc.gluco-, galacto- and mannosidases.endoglucanase
+	2.30131	0.00499677	-4.03203	I1M228	Eukaryotic translation initiation factor 3 subunit D (eIF3d) (Eukaryotic translation initiation factor 3 subunit 7) (eIF-3-zeta)	38	11	63.7	5.69	at4g20980	29.2.3	protein.synthesis.initiation
+	3.32974	0.000468011	-4.09997	I1MXJ1	Uncharacterized protein	36	15	82.2	7.09	at5g67360	29.5.1	protein.degradation.subtilases
+	2.34769	0.00449061	-4.13061	I1JT08	Uncharacterized protein	10	3	81.4	6.67	at1g20160	29.5.1	protein.degradation.subtilases
+	4.85725	1.38915e-05	-4.13862	A0A0R4J3Q3	ABC transporter domain-containing protein	33	4	28.3	5.9	at1g67940	34.16	transport.ABC transporters and multidrug resistance systems
+	3.03073	0.000931687	-4.21541	I1LTU5	Uncharacterized protein	18	6	48.5	7.47	at2g27600	29.5.9	protein.degradation.AAA type
+	1.51597	0.0304811	-4.25544	A0A0R0F5B0	Epimerase domain-containing protein	10	2	48.3	9.67	at3g23820	10.1.6	cell wall.precursor synthesis.GAE
+	2.22072	0.00601561	-4.2622	I1NGD0	Lipoxygenase (EC 1.13.11.-)	12	6	97.9	6.7	at3g22400	17.7.1.2	hormone metabolism.jasmonate.synthesis-degradation.lipoxygenase
+	2.72869	0.00186771	-4.3929	I1KCA8	Elongation factor Tu	39	13	52.1	6.68	at4g20360	29.2.4	protein.synthesis.elongation
+	4.13882	7.264e-05	-4.39636	I1MUQ1	ThiF domain-containing protein	36	9	46.7	4.75	at1g05350	35.1	not assigned.no ontology
+	2.69116	0.0020363	-4.4399	I1KYC4	Peptidase A1 domain-containing protein	15	4	51.9	8.07	at5g10770	27.3.99	RNA.regulation of transcription.unclassified
+	2.43784	0.0036489	-4.44187	A0A0R0I8A1	Xyloglucan endotransglucosylase/hydrolase (EC 2.4.1.207)	41	7	29.9	7.96	at4g25810	10.7	cell wall.modification
+	3.43334	0.000368688	-4.48488	I1JDD7	Cellulose synthase (EC 2.4.1.12)	11	7	121.4	7.18	at5g64740	10.2.1	cell wall.cellulose synthesis.cellulose synthase
+	2.60726	0.00247024	-4.55799	I1LKW4	Uncharacterized protein	21	9	62.4	9.11	at5g22740	10.2	cell wall.cellulose synthesis
+	3.68637	0.000205886	-4.56887	C6T020	Glutathione peroxidase	33	3	18.7	5.72	at2g31570	21.2.2	redox.ascorbate and glutathione.glutathione
+	3.68289	0.000207544	-4.63108	K7MQS3	Peptidase A1 domain-containing protein	16	3	52	8.12	at5g10770	27.3.99	RNA.regulation of transcription.unclassified
+	1.80203	0.0157752	-4.63529	I1LZ94	Phenylalanine ammonia-lyase (EC 4.3.1.24)	38	15	78.1	6.1	at2g37040	16.2.1.1	secondary metabolism.phenylpropanoids.lignin biosynthesis.PAL
+	1.75197	0.0177022	-4.71791	C6TKY7	Str_synth domain-containing protein	8	2	38.8	7.81	at3g57030	16.4.1	secondary metabolism.N misc.alkaloid-like
+	4.01247	9.71687e-05	-4.74512	I1MC22	Lipase_GDSL domain-containing protein	10	2	39.9	7.85	at1g75900	33.99	development.unspecified
+	3.75789	0.000174625	-4.82723	I1NA96	Phenylalanine ammonia-lyase (EC 4.3.1.24)	28	11	77.7	6.49	at2g37040	16.2.1.1	secondary metabolism.phenylpropanoids.lignin biosynthesis.PAL
+	3.67188	0.000212873	-4.863	K7N4G1	Uncharacterized protein	33	10	46.6	6.79	at5g58330	8.2.9	TCA / org. transformation.other organic acid transformaitons.cyt MDH
+	2.78929	0.00162445	-5.00029	Q70MR5	Ornithine decarboxylase (EC 4.1.1.17)	9	2	46.3	5.6	at5g11880	13.1.3.5.5	amino acid metabolism.synthesis.aspartate family.lysine.diaminopimelate decarboxylase
+	3.05547	0.000880093	-5.10483	I1LPJ0	ATP-dependent Clp protease proteolytic subunit (EC 3.4.21.92)	31	4	25.9	7.17	at5g23140	29.5.5	protein.degradation.serine protease
+	4.63749	2.30413e-05	-5.16938	I1N0I7	t-SNARE coiled-coil homology domain-containing protein	16	3	28.1	8.9	at1g16240	31.4	cell.vesicle transport
+	1.92623	0.0118515	-5.49332	A0A0R0GCM7	CMP/dCMP-type deaminase domain-containing protein	19	3	20.6	6.13	at5g28050	23.2	nucleotide metabolism.degradation
+	3.23954	0.000576049	-5.84347	A0A0R0FB78	Uncharacterized protein	33	8	45.8	8.43	at2g05990	11.1.6	lipid metabolism.FA synthesis and FA elongation.enoyl ACP reductase
+	3.72517	0.00018829	-5.9738	A0A0R0KUR1	Phenylalanine ammonia-lyase (EC 4.3.1.24)	20	9	77.9	6.42	at2g37040	16.2.1.1	secondary metabolism.phenylpropanoids.lignin biosynthesis.PAL
+	3.63279	0.00023292	-6.01089	K7MPG5	Uncharacterized protein	28	6	42.4	8.29	at4g39660	13.1.1.3.11	amino acid metabolism.synthesis.central amino acid metabolism.alanine.alanine-glyoxylate aminotransferase
+	2.60748	0.00246899	-6.43464	I1M5G8	Malic enzyme	27	9	71.3	7.55	at1g79750	8.2.10	TCA / org. transformation.other organic acid transformaitons.malic
+	5.53444	2.92122e-06	-7.18717	I1LJF7	\	8	3	56.5	9.38	at3g18830	34.2	transporter.sugars
+	5.55548	2.78302e-06	-10.9263	A0A0R0EIR6	Glycosyltransferase (EC 2.4.1.-)	36	9	54.4	5.92	at1g22360	26.2	misc.UDP glucosyl and glucoronyl transferases

## Sheet: Supplemental Table S4
Supplemental Table 4. List of changed proteins in mutant line soybean under flooding stress compared with non-flooding condition.
Significant	#NAME?	p-value	Difference	Accession	Protein names	Coverage in Percent	Number of Peptides	MW in kDa	calc pI	TAIR ID	Bin codes	MapMan function
+	3.80746	0.000155789	9.69459	Q0WX05	Polygalacturonase inhibiting protein	50	10	36.8	8.34	at5g06860	10.6.3	cell wall.degradation.pectate lyases and polygalacturonases
+	4.22066	6.01646e-05	9.52041	C6T390	Uncharacterized protein	55	6	16.2	5.91	at1g19530	35.2	not assigned.unknown
+	3.36754	0.000428998	7.74476	A0A0R0GEW3	Uncharacterized protein	11	3	30.6	6.8	at4g38260	35.2	not assigned.unknown
+	5.10368	7.87632e-06	7.73957	Q42785	Nonsymbiotic hemoglobin	22	3	18	8.92	at2g16060	21.3	redox.heme
+	3.55624	0.00027782	6.73955	I1JY29	Uncharacterized protein	42	10	41.2	6	at1g77120	5.3	fermentation.ADH
+	6.13658	7.30164e-07	6.56285	I1NF01	Uncharacterized protein	13	8	80.1	6.13	at1g15690	34.3	transport.H+ transporting pyrophosphatase
+	3.44816	0.000356318	6.33462	Q0WX04	Polygalacturonase inhibiting protein	19	3	37.5	8.91	at5g06860	10.6.3	cell wall.degradation.pectate lyases and polygalacturonases
+	3.36316	0.000433352	6.21535	C6TMH8	Ribosomal protein L19	21	2	24.7	11.44	at3g16780	29.2.1.2.2.19	protein.synthesis.ribosomal protein.eukaryotic.60S subunit.L19
+	3.02087	0.000953076	5.82038	I1LJK0	Uncharacterized protein	52	3	7.9	6.6	unknown	unknown	unknown
+	3.69902	0.000199976	5.77552	I1L3I1	Lectin_legB domain-containing protein	12	3	33.2	5.1	at5g10530	30.2.19	signalling.receptor kinases.legume-lectin
+	1.73581	0.0183732	5.69348	C6TFF5	Uncharacterized protein	26	2	11.1	10.45	at5g25940	33.99	development.unspecified
+	2.73308	0.00184893	5.62564	A0A0R0K553	Fe2OG dioxygenase domain-containing protein	38	8	34.8	5.58	at2g19590	17.5.1.2	hormone metabolism.ethylene.synthesis-degradation.1-aminocyclopropane-1-carboxylate oxidase
+	5.91902	1.20498e-06	5.61472	A0A0R0KF48	Uncharacterized protein	41	14	65.2	6.21	at5g01320	5.2	fermentation.PDC
+	3.25353	0.000557784	5.45572	A0A0R0IID0	Uncharacterized protein	31	4	24	6.02	at1g17860	20.1.7.6.1	stress.biotic.PR-proteins.proteinase inhibitors.trypsin inhibitor
+	2.91764	0.00120882	5.43879	C6TMH1	ZnMc domain-containing protein	12	2	40.1	5.63	at1g59970	29.5.7	protein.degradation.metalloprotease
+	4.07039	8.50384e-05	5.42168	C6TDV4	LRRNT_2 domain-containing protein	7	2	36.2	8.43	at5g06860	10.6.3	cell wall.degradation.pectate lyases and polygalacturonases
+	4.34545	4.51388e-05	5.26871	I1KR99	LRRNT_2 domain-containing protein	16	3	37.4	7.91	at5g06860	10.6.3	cell wall.degradation.pectate lyases and polygalacturonases
+	2.47066	0.0033833	4.56045	I1MQG3	Uncharacterized protein	28	3	22.2	5.21	at1g17860	20.1.7.6.1	stress.biotic.PR-proteins.proteinase inhibitors.trypsin inhibitor
+	1.90691	0.0123906	4.31852	A0A0R0KXL5	Uncharacterized protein	23	2	13.6	8.18	at4g39235	35.2	not assigned.unknown
+	3.20205	0.000627986	4.21588	C6TC19	Rhodanese domain-containing protein	13	2	16.4	8.25	at2g17850	29.4	protein.postranslational modification
+	1.46859	0.0339945	4.05626	I1LL87	Uncharacterized protein	18	2	19.3	4.96	at2g41430	20.2.3	stress.abiotic.drought/salt
+	4.9793	1.04881e-05	4.02601	I1LT24	DUF3700 domain-containing protein	33	6	28	6.68	at4g27450	17.2.3	hormone metabolism.auxin.induced-regulated-responsive-activated
+	2.35138	0.00445265	3.99973	C6TLA6	DUF3700 domain-containing protein	20	3	27.5	7.37	at4g27450	17.2.3	hormone metabolism.auxin.induced-regulated-responsive-activated
+	2.18576	0.00651984	3.88854	I1JAL3	Uncharacterized protein	9	3	61	8.68	at1g20560	11.1.8	lipid metabolism.FA synthesis and FA elongation.acyl coa ligase
+	4.63229	2.3319e-05	3.7787	I1MAE6	PKS_ER domain-containing protein	39	11	40.8	6.52	at1g77120	5.3	fermentation.ADH
+	3.89972	0.000125973	3.73081	C6T2R5	RNase H domain-containing protein	14	2	26.7	7.34	at5g42905	35.2	not assigned.unknown
+	4.81383	1.53523e-05	3.64577	I1MBS4	Usp domain-containing protein	27	3	18	9.41	at3g03270	33.99	development.unspecified
+	4.111	7.74464e-05	3.61817	Q42447	Maturation protein (Maturation-associated protein)	27	3	25.6	6.52	unknown	unknown	unknown
+	3.0119	0.000972965	3.47293	I1JQU3	AMP-binding domain-containing protein	6	2	74.4	7.18	at2g47240	11.1.9	lipid metabolism.FA synthesis and FA elongation.long chain fatty acid CoA ligase
+	1.51244	0.0307296	3.46048	I1JS15	Uncharacterized protein	5	3	116.8	6.58	at1g01220	10.1.1.2	cell wall.precursor synthesis.NDP sugar pyrophosphorylase.GDP fucose and fucokinase
+	3.58093	0.000262465	3.43919	C6TCK6	Uncharacterized protein	13	2	25.8	6.86	at1g67360	35.1	not assigned.no ontology
+	3.73153	0.000185554	3.41197	C6THW8	DUF3700 domain-containing protein	40	7	28	6.61	at4g27450	17.2.3	hormone metabolism.auxin.induced-regulated-responsive-activated
+	3.61448	0.00024295	3.33547	I1JZK8	t-SNARE coiled-coil homology domain-containing protein	10	2	33.3	7.14	at5g61210	31.4	cell.vesicle transport
+	4.5183	3.0318e-05	3.27048	C6TN86	Uncharacterized protein	10	2	38.3	6	at5g40510	35.2	not assigned.unknown
+	2.02596	0.00941984	3.15542	A0A0R0FZI3	AB hydrolase-1 domain-containing protein	9	2	33.6	6.54	at2g23620	26.8	misc.nitrilases, *nitrile lyases, berberine bridge enzymes, reticuline oxidases, troponine reductases
+	2.08484	0.00822548	3.14631	A0A0R0F3E0	Histone H2A	21	2	15.5	10.71	at5g27670	28.1.3	DNA.synthesis/chromatin structure.histone
+	2.40094	0.00397248	3.09524	K7KSU9	GYF domain-containing protein	2	2	197.7	6.47	at5g42950	35.1	not assigned.no ontology
+	2.80104	0.00158111	3.05919	I1LYM0	DUF1681 domain-containing protein	23	4	30.7	6.68	at1g03900	35.2	not assigned.unknown
+	1.61062	0.024512	3.00852	C6TKX3	Uncharacterized protein	8	2	27.2	6.4	at3g54300	31.4	cell.vesicle transport
+	2.34099	0.00456049	2.97676	I1MN40	VWFA domain-containing protein	15	3	42.4	4.73	at4g38630	29.5.11	protein.degradation.ubiquitin
+	1.83414	0.0146509	2.95117	I1N846	Uncharacterized protein	27	11	83.9	6.73	at5g36880	11.1.8	lipid metabolism.FA synthesis and FA elongation.acyl coa ligase
+	1.45482	0.0350901	2.94932	C6T229	Uncharacterized protein	32	2	8	8.84	at5g65207	35.2	not assigned.unknown
+	1.80296	0.0157412	2.91024	I1KFZ1	Smg4_UPF3 domain-containing protein	8	2	58.4	10.02	at1g33980	35.1	not assigned.no ontology
+	2.24961	0.00562844	2.80819	I1KSE3	ALOG domain-containing protein	20	2	18.8	9.88	at2g42610	35.2	not assigned.unknown
+	3.50167	0.000315015	2.74566	A0A0R4J2I4	Uncharacterized protein	43	16	65.6	5.94	at5g01320	5.2	fermentation.PDC
+	3.68274	0.000207615	2.71366	I1MEX0	MPN domain-containing protein	57	8	34.6	6.71	at5g23540	29.5.11.20	protein.degradation.ubiquitin.proteasom
+	2.95469	0.00110996	2.69101	A0A024BT07	Acyl-[acyl-carrier-protein] desaturase (EC 1.14.19.-)	12	4	44	7.23	at1g43800	11.1.15	lipid metabolism.FA synthesis and FA elongation.ACP desaturase
+	3.96377	0.000108699	2.68466	C6TB96	Uncharacterized protein	22	5	35.2	5.49	at2g21270	29.5.11	protein.degradation.ubiquitin
+	3.12053	0.000757659	2.64033	A0A0R4J364	Uncharacterized protein	67	16	40.9	6.4	at1g77120	5.3	fermentation.ADH
+	1.48017	0.0330999	2.63986	K7MEI2	Exocyst subunit Exo70 family protein	8	2	75.6	6	at1g72470	31.4	cell.vesicle transport
+	3.67086	0.000213374	2.63377	K7LDT9	Uncharacterized protein	9	5	103.3	6.76	at5g52300	20.2.2	stress.abiotic.cold
+	3.73166	0.000185497	2.51956	K7MVZ6	Glucose-6-phosphate isomerase (EC 5.3.1.9)	37	10	62.7	5.72	at5g42740	4.1.4	glycolysis.cytosolic branch.glucose-6-phosphate isomerase
+	2.13416	0.00734237	2.5094	K7MPT4	TPR_REGION domain-containing protein	6	2	59.8	7.37	at5g37590	31.1	cell.organisation
+	3.19599	0.000636809	2.50318	I1MEH8	Uncharacterized protein	41	6	22.2	7.2	at3g05500	35.1	not assigned.no ontology
+	1.77884	0.0166402	2.45146	I1LC12	SHSP domain-containing protein	30	4	22.4	6.02	at4g10250	20.2.1	stress.abiotic.heat
+	1.88197	0.013123	2.44309	K7MID0	Uncharacterized protein	8	4	96.9	6.39	at5g52300	20.2.2	stress.abiotic.cold
+	3.81912	0.000151665	2.44064	I1KQV7	Uncharacterized protein	38	19	72.5	6.04	at5g09590	20.2.1	stress.abiotic.heat
+	1.84604	0.0142548	2.41938	I1JCQ0	Amino_oxidase domain-containing protein	11	4	60.8	6.9	at5g49555	16.1.4	secondary metabolism.isoprenoids.carotenoids
+	3.96709	0.000107872	2.40792	I1J6C3	Arf-GAP domain-containing protein	34	8	43.2	8.92	at4g17890	29.5.11.5	protein.degradation.ubiquitin.ubiquitin protease
+	2.80181	0.00157832	2.38303	I1K9P4	ZF-HD dimerization-type domain-containing protein	18	2	32.4	6.52	at4g24660	27.3.80	RNA.regulation of transcription.zf-HD
+	2.47179	0.00337452	2.34705	I1MR73	Uncharacterized protein	4	2	58	8.9	at1g11600	26.1	misc.cytochrome P450
+	3.08256	0.00082688	2.33838	I1KJ00	Uncharacterized protein	14	3	28.2	5.43	at1g18390	30.2.20	signalling.receptor kinases.wheat LRK10 like
+	1.85989	0.0138073	2.32787	I1JK18	Translocase of chloroplast (EC 3.6.5.-)	23	4	34.9	9.33	at5g05000	29.3.3	protein.targeting.chloroplast
+	1.66319	0.0217174	2.26511	I1NHI7	VHS domain-containing protein	6	7	222.6	7.78	at2g35630	31.1	cell.organisation
+	2.13496	0.00732895	2.2449	I1MCF0	Uncharacterized protein	23	5	45.2	6.43	at1g15330	35.1	not assigned.no ontology
+	1.72656	0.018769	2.22467	Q01527	Maturation protein (Soybean seed maturation polypeptides)	38	2	15.6	9.66	at5g06760	33.2	development.late embryogenesis abundant
+	2.09516	0.00803231	2.21779	K7MM61	Uncharacterized protein	3	5	256.7	6.2	at3g50370	35.2	not assigned.unknown
+	3.08967	0.000813457	2.20976	Q9ZTY1	35 kDa seed maturation protein	10	2	35.3	6.32	at2g36640	33.2	development.late embryogenesis abundant
+	2.11525	0.00766915	2.19483	K7LLK0	Uncharacterized protein	19	9	88.2	5.15	at1g14650	27.1	RNA.processing
+	1.71978	0.0190642	2.19413	I1K9W9	Uncharacterized protein	14	2	34.7	8.54	at4g08950	30.1.1	signalling.in sugar and nutrient physiology
+	1.31661	0.048238	2.17979	A0A0R0GIX5	Nicotinamide-nucleotide adenylyltransferase (EC 2.7.7.1) (EC 2.7.7.18) (Nicotinate-nucleotide adenylyltransferase)	15	2	31.7	6.73	at5g55810	18	Co-factor and vitamine metabolism
+	5.1722	6.7266e-06	2.16915	C6TME1	Uncharacterized protein	32	9	35.8	9.58	at1g67730	16.7	secondary metabolism.wax
+	3.02879	0.00093586	2.16076	I1KUE9	WD_REPEATS_REGION domain-containing protein	10	2	38.8	8.22	at1g80670	27.1	RNA.processing
+	2.05658	0.00877846	2.1588	C6T063	ANK_REP_REGION domain-containing protein	36	2	16.8	4.63	at5g12320	31.1	cell.organisation
+	4.01808	9.59218e-05	2.14609	I1MUP6	Uncharacterized protein	47	14	46.4	5.11	at3g48530	10.5	cell wall.cell wall proteins
+	1.5096	0.0309312	2.12432	I1JE40	Uncharacterized protein	35	16	68.9	7.36	at1g26850	20.2.3	stress.abiotic.drought/salt
+	1.60567	0.0247931	2.12041	I1M138	Peptidase A1 domain-containing protein	10	3	51.2	8	at1g03220	29.5.4	protein.degradation.aspartate protease
+	1.95215	0.0111648	2.11482	A0A0R0ENW6	Peptidase A1 domain-containing protein	35	8	46.3	8.53	at1g03220	29.5.4	protein.degradation.aspartate protease
+	1.50966	0.0309273	2.10948	A0A0R0KSG7	Ribosomal protein L19	17	2	24.7	11.4	at3g16780	29.2.1.2.2.19	protein.synthesis.ribosomal protein.eukaryotic.60S subunit.L19
+	2.01158	0.00973691	2.02444	K7MFQ7	Uncharacterized protein	15	6	68.8	8.5	at1g31850	20.2.3	stress.abiotic.drought/salt
+	1.33291	0.0464614	2.01012	I1LF63	Importin N-terminal domain-containing protein	30	14	99.4	5.05	at2g16950	29.3.1	protein.targeting.nucleus
+	4.33339	4.64094e-05	1.94533	I1L3K7	Uncharacterized protein	64	17	48	6.29	at2g36530	4.1.14	glycolysis.cytosolic branch.enolase
+	5.52711	2.97094e-06	1.94457	I1M7P3	Uncharacterized protein	34	2	14.7	4.93	at4g14270	35.2	not assigned.unknown
+	3.31101	0.000488637	1.93802	I1MV69	Uncharacterized protein	25	4	27.5	9.2	at4g17030	10.7	cell wall.modification
+	2.32942	0.00468364	1.90568	A0A0R4J5T8	Uncharacterized protein	11	4	75	6.54	at3g24090	35.1	not assigned.no ontology
+	1.60165	0.0250238	1.89818	A0A0R4J4L3	Annexin	31	9	35.9	7.91	at5g12380	31.1	cell.organisation
+	3.05336	0.000884391	1.883	Q9SEL0	Seed maturation protein PM24	20	3	26.8	5.33	at3g22490	33.2	development.late embryogenesis abundant
+	3.66592	0.000215813	1.86198	A0A0R0F259	Uncharacterized protein	41	14	65.2	6.21	at5g54960	5.2	fermentation.PDC
+	2.54518	0.00284981	1.86168	I1J8S7	Uncharacterized protein	46	7	29.3	6.73	at1g19580	9.1.1.5	mitochondrial electron transport / ATP synthesis.NADH-DH.complex I.carbonic anhydrase
+	2.37946	0.00417391	1.85513	I1JPH6	Lambda class glutathione S-transferase	50	7	26.8	6.01	at5g02790	26.9	misc.glutathione S transferases
+	2.8111	0.00154491	1.84751	I1K301	Uncharacterized protein	59	7	14.8	5.71	at1g29850	35.1	not assigned.no ontology
+	2.65892	0.00219319	1.83787	I1N627	PHB domain-containing protein	26	6	31.5	5.24	at5g62740	35.1	not assigned.no ontology
+	1.46698	0.0341209	1.82236	A0A0R4J3N3	SHSP domain-containing protein	32	3	18.2	7.5	at1g54050	20.2.1	stress.abiotic.heat
+	3.87819	0.000132377	1.80838	I1M1V8	Uncharacterized protein	56	18	63.4	6.11	at5g54960	5.2	fermentation.PDC
+	1.90662	0.0123987	1.80432	I1NFP9	PB1 domain-containing protein	19	6	78.2	6.3	at2g01190	35.1	not assigned.no ontology
+	4.40056	3.97592e-05	1.80032	K7KGC7	Sucrose synthase (EC 2.4.1.13)	41	31	92.2	6.13	at4g02280	2.2.1.5	major CHO metabolism.degradation.sucrose.Susy
+	3.16241	0.000687996	1.7961	I1JU00	SHSP domain-containing protein	15	2	17.9	7.18	at5g12020	20.2.1	stress.abiotic.heat
+	3.50471	0.00031282	1.78946	C6TFW0	Uncharacterized protein	37	3	13.3	9.16	unknown	unknown	unknown
+	1.73164	0.0185508	1.76684	I1N9W2	WD_REPEATS_REGION domain-containing protein	5	2	70.5	6.64	at2g20330	33.99	development.unspecified
+	4.02206	9.50474e-05	1.76681	C6SVT0	Usp domain-containing protein	42	6	18	7.15	at3g62550	17.5.3	hormone metabolism.ethylene.induced-regulated-responsive-activated
+	3.27273	0.000533671	1.74822	K7LNG2	NmrA domain-containing protein	53	12	41.8	8.21	at1g75280	16.8.5	secondary metabolism.flavonoids.isoflavonols
+	3.36619	0.000430342	1.70568	A0A0R4J3M4	Uncharacterized protein	41	15	65.1	6.27	at4g33070	5.2	fermentation.PDC
+	3.95296	0.000111441	1.70246	K7MZJ0	Sucrose synthase (EC 2.4.1.13)	47	33	92.2	6.38	at4g02280	2.2.1.5	major CHO metabolism.degradation.sucrose.Susy
+	3.38678	0.000410413	1.69938	C6SVM2	Uncharacterized protein	27	2	17.4	8.94	at2g21490	20.2.99	stress.abiotic.unspecified
+	1.41192	0.0387328	1.69391	I1MWJ3	Uncharacterized protein	19	2	19	9.48	at4g31360	35.2	not assigned.unknown
+	2.0021	0.00995185	1.68959	K7L1E9	Fe2OG dioxygenase domain-containing protein	15	3	34.7	5.71	at2g19590	17.5.1.2	hormone metabolism.ethylene.synthesis-degradation.1-aminocyclopropane-1-carboxylate oxidase
+	2.6053	0.00248144	1.66494	P04670	Uricase-2 isozyme 1 (EC 1.7.3.3) (Nodule-specific uricase) (Nodulin 35) (N-35) (Urate oxidase) (Uricase II isozyme 1)	46	12	35.1	7.97	at2g26230	23.2	nucleotide metabolism.degradation
+	3.1279	0.00074491	1.66347	K7LKJ0	HMA domain-containing protein	48	3	8.6	6.6	at1g66240	15.2	metal handling.binding, chelation and storage
+	2.11385	0.00769391	1.65279	I1JSX4	AAA domain-containing protein	18	8	74.1	6.19	at5g42270	29.5.7	protein.degradation.metalloprotease
+	1.55182	0.0280661	1.6458	C6TEY7	Ubiquitin thioesterase (EC 3.4.19.12)	39	6	33.8	4.91	at1g28120	35.2	not assigned.unknown
+	2.04535	0.00900837	1.63964	I1K7R0	Uncharacterized protein	27	3	16.1	5.35	at1g19530	35.2	not assigned.unknown
+	3.12845	0.000743955	1.6056	I1JFL5	Inhibitor I9 domain-containing protein	26	3	14.7	6.52	at1g71950	35.1	not assigned.no ontology
+	1.46826	0.0340204	1.58065	I1K1B0	Uncharacterized protein	13	2	34.2	5.02	at4g32610	35.1	not assigned.no ontology
+	1.54021	0.0288267	1.57608	I1MX49	Uncharacterized protein	22	6	46	6.35	at4g31810	11.9.4.3	lipid metabolism.lipid degradation.beta-oxidation.enoyl CoA hydratase
+	1.75804	0.0174568	1.55167	I1JFD2	BSD domain-containing protein	24	6	50.4	4.53	at1g03350	35.1.8	not assigned.no ontology.BSD domain-containing protein
+	1.4384	0.036442	1.54307	I1K850	Uncharacterized protein	15	5	82.5	8.88	at5g67360	29.5.1	protein.degradation.subtilases
+	1.45766	0.0348611	1.52032	A0A0R0JD83	Ligase_CoA domain-containing protein	35	15	63.1	6.71	at5g49460	8.2.11	TCA / org. transformation.other organic acid transformaitons.atp-citrate lyase
+	1.82233	0.0150545	1.51997	I1LZK9	Uncharacterized protein	17	5	65.4	6.87	at4g22350	29.5.11.1	protein.degradation.ubiquitin.ubiquitin
+	2.27443	0.00531583	1.5094	A0A0R0KL81	Uncharacterized protein	7	3	80.9	7.14	at5g53180	27.1	RNA.processing
+	3.45773	0.000348552	1.50657	C6TEE9	Uncharacterized protein	55	10	30.4	6.09	at1g64980	35.2	not assigned.unknown
+	1.55621	0.0277837	1.50411	A0A0R0GPZ3	SHSP domain-containing protein	16	2	17.6	5.97	at1g07400	20.2.1	stress.abiotic.heat
+	1.83996	0.0144556	1.49528	K7K3E3	Uncharacterized protein	4	3	147.9	5.27	at5g01400	35.2	not assigned.unknown
+	1.49886	0.0317056	1.47372	K7KVD9	Uncharacterized protein	4	2	73.5	6.42	at5g23570	27.3.99	RNA.regulation of transcription.unclassified
+	2.58049	0.00262731	1.43801	C6K8D1	Seed biotinylated protein 68 kDa isoform	23	9	67.9	6.58	at2g42560	35.1.22	not assigned.no ontology.late embryogenesis abundant domain-containing protein
+	2.27213	0.00534402	1.43035	K7M5G4	GYF domain-containing protein	3	3	205.6	6.46	at5g42950	35.1	not assigned.no ontology
+	2.44356	0.00360114	1.42859	I1JKK8	SEC7 domain-containing protein	9	11	198.7	5.66	at3g60860	30.5	signalling.G-proteins
+	2.86169	0.00137503	1.42662	I1KKH2	Importin N-terminal domain-containing protein	6	3	114.8	5.68	at3g08960	34	transport
+	1.7629	0.0172626	1.41583	I1NA37	Uncharacterized protein	35	4	21	6.93	at5g02770	35.2	not assigned.unknown
+	3.89412	0.000127609	1.413	I1MKC8	Starch synthase, chloroplastic/amyloplastic (EC 2.4.1.-)	26	10	68.1	7.06	at1g32900	2.1.2.2	major CHO metabolism.synthesis.starch.starch synthase
+	1.77468	0.0168005	1.41	K7L6T7	Protein kinase domain-containing protein	7	4	73.6	7.24	at2g32850	29.4	protein.postranslational modification
+	3.71951	0.000190762	1.4078	A0A0R0JL19	Uncharacterized protein	70	17	41	6.4	at1g77120	5.3	fermentation.ADH
+	3.10271	0.000789382	1.40573	I1MUR0	UBX domain-containing protein	20	8	65.5	4.73	at4g11740	31.4	cell.vesicle transport
+	2.25571	0.00554997	1.39471	A0A0R4J4G9	SHSP domain-containing protein	22	3	23.7	6.98	at4g25200	20.2.1	stress.abiotic.heat
+	1.32832	0.0469553	1.37359	Q9SWB2	Seed maturation protein PM41	31	2	8.2	4.97	at2g21820	35.2	not assigned.unknown
+	2.4168	0.00383	1.37229	M1FIS9	Ribosomal protein S4	11	3	41.3	11.22	atmg00290	29.2.1.1.2.1.4	protein.synthesis.ribosomal protein.prokaryotic.mitochondrion.30S subunit.S4
+	1.58875	0.0257778	1.36123	I1KXF9	Carbonic anhydrase (EC 4.2.1.1) (Carbonate dehydratase)	20	4	28.1	6.77	at5g14740	8.3	TCA / org. transformation.carbonic anhydrases
+	3.33855	0.000458617	1.35759	C6TNN5	ZnMc domain-containing protein	29	7	43.4	6.1	at1g59970	29.5.7	protein.degradation.metalloprotease
+	2.06881	0.0085348	1.34523	I1M7N8	Uncharacterized protein	20	5	32.7	4.96	at3g56190	29.3.4.99	protein.targeting.secretory pathway.unspecified
+	1.4557	0.0350187	1.34018	I1KWD8	Uncharacterized protein	36	7	49.8	5.27	at3g02100	26.2	misc.UDP glucosyl and glucoronyl transferases
+	3.20314	0.000626411	1.33861	A1YZE0	Starch synthase, chloroplastic/amyloplastic (EC 2.4.1.-)	24	9	68	7.06	at1g32900	2.1.2.2	major CHO metabolism.synthesis.starch.starch synthase
+	1.56176	0.0274309	1.32178	I1JPH2	Uncharacterized protein	21	2	20.2	6.93	at5g02770	35.2	not assigned.unknown
+	1.56827	0.0270229	1.31247	I1L7V7	Usp domain-containing protein	30	2	17.2	7.87	at2g47710	20.2.99	stress.abiotic.unspecified
+	2.90866	0.00123408	1.29848	Q9S7N8	Seed maturation protein PM21 (Seed maturation protein PM35)	48	2	10.1	5.01	at2g23110	35.2	not assigned.unknown
+	3.46877	0.000339806	1.29564	A0A0R4J2Q1	Peptidase A1 domain-containing protein	27	8	46.4	8.34	at1g03220	29.5.4	protein.degradation.aspartate protease
+	1.38141	0.0415522	1.2867	A0A0R0FSB9	Uncharacterized protein (Fragment)	49	2	11.2	9.2	at4g31830	35.2	not assigned.unknown
+	2.1619	0.00688804	1.28277	K7K676	AP-1 complex subunit gamma	21	10	95.5	6.51	at1g60070	31.4	cell.vesicle transport
+	1.53391	0.0292477	1.24993	K7KHI6	Bifunctional dihydrofolate reductase-thymidylate synthase	15	5	59.7	6.73	at2g16370	25	C1-metabolism
+	3.62611	0.000236534	1.24648	I1J9W0	40S ribosomal protein S30	11	2	11.6	12.07	at5g56670	29.2.1.2.1.30	protein.synthesis.ribosomal protein.eukaryotic.40S subunit.S30
+	2.05008	0.00891089	1.24047	C6T9H6	Uncharacterized protein	26	5	42.3	7.56	at2g40660	29.1	protein.aa activation
+	2.79232	0.00161316	1.23878	I1M2S7	Lactamase_B domain-containing protein	47	15	41.4	8.72	at1g53580	24.1	Biodegradation of Xenobiotics.hydroxyacylglutathione hydrolase
+	2.36869	0.00427869	1.23134	A0A0R0EX12	Histone H4	21	4	17.9	11.36	at5g59970	31.1	cell.organisation
+	2.23524	0.00581781	1.23117	I1NDA1	Uncharacterized protein	25	4	31.8	6.18	at2g01490	26.14	misc.oxygenases
+	1.58897	0.0257647	1.22631	A0A0R0KE56	Pectinesterase (EC 3.1.1.11)	27	5	32.2	8.7	at2g45220	10.8.99	cell wall.pectin*esterases.misc
+	2.65386	0.00221891	1.22321	Q9XER5	Seed maturation protein PM22	36	4	16.7	5.36	at1g01470	33.2	development.late embryogenesis abundant
+	3.36699	0.00042955	1.21334	I1L957	Uncharacterized protein	33	11	48.8	6.42	at2g36640	33.2	development.late embryogenesis abundant
+	4.00889	9.79733e-05	1.21161	K7MIR3	Enolase_C domain-containing protein	67	15	38.3	6.8	at2g36530	4.1.14	glycolysis.cytosolic branch.enolase
+	1.62876	0.0235091	1.1965	O23959	Ca+2-binding EF hand protein	23	4	27	6.44	at4g26740	33.99	development.unspecified
+	1.61152	0.0244611	1.1741	I1J7T0	Pectinesterase (EC 3.1.1.11)	20	7	56.5	9.01	at2g45220	10.8.99	cell wall.pectin*esterases.misc
+	2.30064	0.00500444	1.17059	C6T1V2	SHSP domain-containing protein	46	4	17.7	6.81	at1g53540	20.2.1	stress.abiotic.heat
+	1.38167	0.0415266	1.16999	A0A0R0L186	SHSP domain-containing protein	18	3	17.3	7.42	at1g53540	20.2.1	stress.abiotic.heat
+	2.55313	0.00279813	1.15585	I1M3D5	Arf-GAP domain-containing protein	12	4	52.3	8.43	at5g54310	27.3.99	RNA.regulation of transcription.unclassified
+	2.16283	0.00687338	1.1315	I1LTF0	Uncharacterized protein	14	3	51.8	8.78	at4g20020	35.2	not assigned.unknown
+	2.31079	0.00488889	1.1297	C6T1S9	Uncharacterized protein	23	2	13.6	10.45	at2g43640	29.3.4.99	protein.targeting.secretory pathway.unspecified
+	2.07639	0.00838705	1.12248	I1J4D5	Uncharacterized protein	41	6	26.6	5.9	at4g26220	16.2.1.6	secondary metabolism.phenylpropanoids.lignin biosynthesis.CCoAOMT
+	2.607	0.00247174	1.11636	K7MFC0	GYF domain-containing protein	5	7	179.2	6.23	at1g27430	35.1	not assigned.no ontology
+	1.98699	0.0103041	1.11425	A0A0R4J4X6	SHSP domain-containing protein	39	6	18.5	8.34	at1g07400	20.2.1	stress.abiotic.heat
+	2.40441	0.00394086	1.11366	K7LRE0	Uncharacterized protein	24	4	10.3	5.21	at5g04800	29.2.1.2.1.17	protein.synthesis.ribosomal protein.eukaryotic.40S subunit.S17
+	1.85133	0.0140821	1.09204	I1KS18	Uncharacterized protein	25	4	25.3	6.52	at1g67360	35.1	not assigned.no ontology
+	2.72307	0.00189205	1.09137	C6T3U6	Ribosomal protein L19	17	2	24.8	11.44	at3g16780	29.2.1.2.2.19	protein.synthesis.ribosomal protein.eukaryotic.60S subunit.L19
+	2.28419	0.00519767	1.08703	A0A0R0H3L4	Poly [ADP-ribose] polymerase (PARP) (EC 2.4.2.-)	40	21	91.6	5.59	at5g22470	29.4	protein.postranslational modification
+	2.51105	0.0030828	1.0746	I1KG22	Uncharacterized protein	10	4	84.8	5.94	at1g16780	34.3	transport.H+ transporting pyrophosphatase
+	1.49351	0.0320989	1.06887	I1K964	Proteasome subunit beta (EC 3.4.25.1)	78	11	25.1	5.55	at4g31300	29.5.11.20	protein.degradation.ubiquitin.proteasom
+	1.42077	0.0379513	1.06566	A0A368UH41	TOG domain-containing protein	14	9	118.8	6.76	at5g64270	27.1.1	RNA.processing.splicing
+	2.25982	0.00549766	1.05437	I1NEU8	Aminotran_5 domain-containing protein	23	6	49.5	7.31	at5g26600	35.1	not assigned.no ontology
+	5.14493	7.16263e-06	1.04954	K7L8B5	Uncharacterized protein	42	5	15.3	4.64	at2g44310	30.3	signalling.calcium
+	1.59473	0.0254256	1.04185	I1JH91	Uncharacterized protein	5	2	92.3	6.65	at3g07660	35.2	not assigned.unknown
+	2.17072	0.00674956	1.03126	K7LM54	Rab-GAP TBC domain-containing protein	15	8	93.2	4.83	at3g55020	30.5	signalling.G-proteins
+	2.66789	0.00214839	1.02194	C6T244	Uncharacterized protein	30	2	14	5.17	at1g78190	35.2	not assigned.unknown
+	1.51002	0.0309016	1.02109	A0A0R0EXK4	Uncharacterized protein	15	7	70.7	8.37	at3g23300	20.2.3	stress.abiotic.drought/salt
+	3.05399	0.000883094	1.00864	I1KY70	Uncharacterized protein	5	2	86	6.02	at1g11660	20.2.1	stress.abiotic.heat
+	1.6111	0.0244851	1.00718	I1MD29	PHD-type domain-containing protein	15	2	28.1	4.84	at5g20510	27.3.2	RNA.regulation of transcription.Alfin-like
+	2.0083	0.00981062	1.0057	I1JLC8	Protein SLE2 (Em protein) (Protein Glycine max physiologically mature 11) (Protein GmD-19) (Soybean group-1 late embryogenesis abundant protein 2) (Soybean group-1 lea protein 2) (Sle2)	35	3	11.5	5.6	at2g40170	17.1.3	hormone metabolism.abscisic acid.induced-regulated-responsive-activated
+	2.87803	0.00132424	1.00559	I1KW96	Uncharacterized protein	3	2	117.1	8.57	at1g22610	35.1.19	not assigned.no ontology.C2 domain-containing protein
+	2.00082	0.00998114	1.00273	C6TK48	Uncharacterized protein	7	2	44.9	5.57	at4g15410	29.5	protein.degradation
+	2.85268	0.00140386	0.999731	I1KX25	Arf-GAP domain-containing protein	47	11	43.4	8.92	at4g17890	29.5.11.5	protein.degradation.ubiquitin.ubiquitin protease
+	1.74024	0.018187	0.996024	A0A0R0GA14	SHSP domain-containing protein	30	4	17.9	7.5	at1g53540	20.2.1	stress.abiotic.heat
+	1.95509	0.0110895	0.994706	A0A0R0GZ36	Uncharacterized protein	48	9	41.3	5.99	at1g15330	35.1	not assigned.no ontology
+	2.07058	0.00850008	0.991863	Q8RVH5	Basic 7S globulin 2 (SBg7S) (Bg) [Cleaved into: Basic 7S globulin 2 high kDa subunit;Basic 7S globulin 2 low kDa subunit]	40	8	47.2	8.25	at1g03220	29.5.4	protein.degradation.aspartate protease
+	1.59306	0.0255235	0.987068	Q9XET0	Seed maturation protein PM30	30	4	15.1	8.9	at1g52690	33.2	development.late embryogenesis abundant
+	3.75935	0.00017404	0.984539	I1KMW4	TPR_REGION domain-containing protein	12	4	50	8.18	at3g16760	35.1.5	not assigned.no ontology.pentatricopeptide (PPR) repeat-containing protein
+	1.7528	0.0176684	0.975734	I1MB74	Uncharacterized protein	4	2	92	6.64	at3g07660	35.2	not assigned.unknown
+	2.8136	0.00153605	0.968521	Q39873	Lea protein	22	8	49.4	7.52	at2g18340	35.1.22	not assigned.no ontology.late embryogenesis abundant domain-containing protein
+	2.33614	0.00461172	0.963238	C6T1E1	t-SNARE coiled-coil homology domain-containing protein	44	4	14.4	5.9	at3g58170	29.3.4.2	protein.targeting.secretory pathway.golgi
+	2.19013	0.00645461	0.962587	I1JS10	Uncharacterized protein	86	2	6.8	8.92	at2g46540	35.2	not assigned.unknown
+	3.95033	0.000112116	0.960485	I1LN49	Uncharacterized protein	50	8	27	7.06	at1g05510	35.2	not assigned.unknown
+	1.96387	0.0108675	0.960264	C6SWV4	Uncharacterized protein	40	5	18.8	6.32	at4g16160	29.3.2	protein.targeting.mitochondria
+	2.3617	0.0043481	0.959729	I1K517	Uncharacterized protein	11	3	47	5.53	at5g63860	20.2.5	stress.abiotic.light
+	1.46545	0.0342409	0.949317	K7KBB0	Phi class glutathione S-transferase	39	6	24.8	6.3	at2g30860	26.9	misc.glutathione S transferases
+	1.52957	0.0295412	0.946785	I1LKD9	Protein transport protein Sec61 subunit beta	41	4	10.9	11.65	at5g60460	29.3.4.99	protein.targeting.secretory pathway.unspecified
+	2.45938	0.00347234	0.941721	I1M0K3	Cysteine proteinase inhibitor	50	9	27.7	7.08	at3g12490	29.5.3	protein.degradation.cysteine protease
+	1.94398	0.0113768	0.939134	C6SVX0	SHSP domain-containing protein	39	6	18.5	6.09	at1g53540	20.2.1	stress.abiotic.heat
+	1.55292	0.0279949	0.938975	A0A0R0G8Z2	Cysteine proteinase inhibitor	13	2	22.5	5.3	at3g12490	29.5.3	protein.degradation.cysteine protease
+	1.91407	0.0121878	0.932918	C6T374	VOC domain-containing protein	61	4	15.4	5.69	at1g07645	24.2	Biodegradation of Xenobiotics.lactoylglutathione lyase
	1.35303	0.0443581	0.932322	I1KJK0	HABP4_PAI-RBP1 domain-containing protein	29	7	39.3	6.19	at4g17520	27.4	RNA.RNA binding
+	1.83561	0.0146014	0.930447	I1LNT7	Uncharacterized protein	6	4	83.7	6.01	at5g51300	27.1.1	RNA.processing.splicing
+	1.5008	0.0315646	0.929622	K7MQM3	C2 domain-containing protein	26	8	46.5	4.67	at5g55530	20.2.2	stress.abiotic.cold
+	1.55232	0.0280335	0.928792	I1KCD7	Uncharacterized protein	40	26	90.9	5.24	at5g03340	31.2	cell.division
+	2.70896	0.0019545	0.920555	C6TFW8	Uncharacterized protein (Fragment)	18	3	25.9	7.3	at1g17100	19.99	tetrapyrrole synthesis.unspecified
+	3.31814	0.000480685	0.917228	I1K0C8	UBX domain-containing protein	26	9	65.7	4.73	at4g11740	31.4	cell.vesicle transport
+	1.54267	0.0286635	0.915833	K7MXK9	Hydrolase_4 domain-containing protein	13	4	77.3	7.94	at5g41130	35.1	not assigned.no ontology
+	2.969	0.001074	0.911977	I1MKT8	Glycosyltransferase (EC 2.4.1.-)	29	8	54.4	6.84	at2g15480	26.2	misc.UDP glucosyl and glucoronyl transferases
+	1.63353	0.0232528	0.909935	I1J5P9	Glycosyltransferase (EC 2.4.1.-)	28	8	56.1	5.88	at2g15480	26.2	misc.UDP glucosyl and glucoronyl transferases
+	1.93546	0.0116021	0.904523	I1JEB4	ANK_REP_REGION domain-containing protein	34	6	26	5.12	at2g03430	31.1	cell.organisation
+	1.92586	0.0118614	0.904464	I1K7F5	MaoC-like domain-containing protein	13	3	34.1	8.53	at1g76150	11.8	lipid metabolism.''exotics'' (steroids, squalene etc)
	1.4095	0.0389493	0.899186	I1MX00	Protein kinase domain-containing protein	9	4	75.5	6.42	at5g10530	30.2.19	signalling.receptor kinases.legume-lectin
+	2.64953	0.00224116	0.897134	A0A0R4J387	Chalcone-flavonone isomerase family protein	62	8	23.5	5	at5g05270	16.8.2	secondary metabolism.flavonoids.chalcones
+	2.83407	0.00146531	0.895576	I1NG02	Thioredoxin domain-containing protein	31	4	24.4	5.57	at2g18990	35.2	not assigned.unknown
+	2.28386	0.00520165	0.892283	C6T9B1	cobW domain-containing protein	53	9	31.4	6.48	at2g34470	13.2.2.3	amino acid metabolism.degradation.glutamate family.arginine
+	3.61771	0.00024115	0.89184	A0A0R0E8N5	Uricase (EC 1.7.3.3) (Urate oxidase)	62	15	35.1	8.29	at2g26230	23.2	nucleotide metabolism.degradation
+	2.94111	0.00114523	0.887397	I1KHE4	TPR_REGION domain-containing protein	9	2	33.1	8.98	at3g14110	19.4	tetrapyrrole synthesis.regulation
+	1.81061	0.0154666	0.88078	A0A0R0ES33	Uncharacterized protein	32	6	37.2	6.65	at5g27410	26.26.1	misc.aminotransferases.aminotransferase class IV family protein
+	2.04371	0.0090425	0.880528	I1LR42	Uncharacterized protein	5	3	93.8	4.59	at1g07990	26.13	misc.acid and other phosphatases
+	2.40367	0.00394753	0.878826	Q39801	51 kDa seed maturation protein	25	10	51	7.11	at3g53040	33.2	development.late embryogenesis abundant
+	3.07422	0.000842905	0.869061	B3TDK6	Lipoxygenase (EC 1.13.11.-)	73	45	96.7	6.58	at1g55020	17.7.1.2	hormone metabolism.jasmonate.synthesis-degradation.lipoxygenase
+	2.28689	0.00516545	0.865679	K7MS29	PPDK_N domain-containing protein	22	20	164	6.77	at1g10760	2.2.2.3	major CHO metabolism.degradation.starch.glucan water dikinase
+	1.47856	0.0332228	0.865641	K7MR36	Citrate synthase (EC 2.3.3.16)	30	9	56.6	9.38	at3g58750	6.1	gluconeogenese/ glyoxylate cycle.citrate synthase
+	1.88653	0.0129858	0.863097	C6SV68	Cysteine proteinase inhibitor	31	2	11.4	6.06	at3g12490	29.5.3	protein.degradation.cysteine protease
+	2.4354	0.00366941	0.862916	C6SZK3	Glutathione peroxidase	44	5	18.4	7.09	at4g11600	21.2.2	redox.ascorbate and glutathione.glutathione
+	1.76815	0.017055	0.862596	I1KGM8	Uncharacterized protein	5	2	66.3	7.64	at3g16170	11.1.8	lipid metabolism.FA synthesis and FA elongation.acyl coa ligase
+	1.71959	0.0190728	0.862522	A0A0R0KRH5	Uncharacterized protein	12	3	44.7	4.82	at1g06210	31.4	cell.vesicle transport
+	2.93052	0.00117349	0.857426	I1N5N0	Pyruvate kinase (EC 2.7.1.40)	55	19	55.2	7.56	at5g08570	4.1.15	glycolysis.cytosolic branch.pyruvate kinase (PK)
+	2.43908	0.00363847	0.85322	I1LDP2	Uncharacterized protein	16	4	27.9	8.92	at5g52420	35.2	not assigned.unknown
+	1.81453	0.0153273	0.847133	A0A0R4J3K7	Epimerase domain-containing protein	11	3	35.8	6.86	at2g33590	16.2	secondary metabolism.phenylpropanoids
+	1.69011	0.0204123	0.845388	A0A0R4J3X4	SHSP domain-containing protein	31	4	25.6	7.49	at1g52560	20.2.1	stress.abiotic.heat
+	2.9086	0.00123423	0.842628	Q8W198	Phosphate transporter	36	12	36.3	9.04	at5g14040	34.9	transport.metabolite transporters at the mitochondrial membrane
+	2.92481	0.00118901	0.842039	C6T9B7	Uncharacterized protein	21	5	31.6	7.24	at2g26210	31.1	cell.organisation
+	2.69781	0.00200534	0.841884	C6SYZ8	Uncharacterized protein	23	5	23.6	10.32	at5g48760	29.2.1.2.2.513	protein.synthesis.ribosomal protein.eukaryotic.60S subunit.L13A
+	1.92987	0.0117524	0.838978	I1K7Z6	VID27 domain-containing protein	10	4	70.4	5.58	at4g33400	33.99	development.unspecified
+	1.47853	0.0332251	0.838421	C6SXR9	Uncharacterized protein	15	3	26.1	8.05	at3g08740	29.2.4	protein.synthesis.elongation
	1.3489	0.0447821	0.83374	K7KRK2	Uncharacterized protein	17	3	31.5	6.44	at1g07210	29.2.1.1.3.1.18	protein.synthesis.ribosomal protein.prokaryotic.unknown organellar.30S subunit.S18
+	1.79476	0.0160413	0.831979	I1LP93	Phospholipid scramblase	12	3	40.2	9.57	at2g04940	35.1	not assigned.no ontology
+	2.18431	0.0065417	0.829651	A0A0R0EEE4	HMA domain-containing protein	32	3	13.6	7.72	at1g66240	15.2	metal handling.binding, chelation and storage
+	2.13526	0.00732384	0.821253	K7KP23	Uncharacterized protein	5	2	60.5	9	at5g63380	16.2	secondary metabolism.phenylpropanoids
+	3.2625	0.00054639	0.82024	I1MDA0	Uncharacterized protein	19	2	17.1	10.17	at5g52370	35.2	not assigned.unknown
+	2.3222	0.0047621	0.815846	I1KJM6	Uncharacterized protein	24	7	55.2	8.1	at1g11680	17.3.1.2.3	hormone metabolism.brassinosteroid.synthesis-degradation.sterols.CYP51
+	3.52732	0.00029695	0.812923	I1JE17	Glycosyltransferase (EC 2.4.1.-)	50	13	53.1	5.86	at4g34131	26.2	misc.UDP glucosyl and glucoronyl transferases
+	1.98846	0.0102692	0.810716	A0A0R0GAY5	Peroxidase (EC 1.11.1.7)	7	2	37.8	7.94	at2g18980	26.12	misc.peroxidases
+	2.92062	0.00120056	0.806841	C6SXY3	Glutaredoxin domain-containing protein	17	2	18.1	6.32	at3g15660	21.4	redox.glutaredoxins
	1.39724	0.0400645	0.797043	I1NDG9	Uncharacterized protein	9	2	43.1	5.95	at1g30480	28.2	DNA.repair
+	2.4658	0.00342136	0.796237	I1KZ41	Glycosyltransferase (EC 2.4.1.-)	21	5	54.3	6.74	at2g15490	26.2	misc.UDP glucosyl and glucoronyl transferases
+	2.36924	0.00427328	0.795689	I1JV82	TPR_REGION domain-containing protein	32	4	24.1	8.7	at5g65520	35.2	not assigned.unknown
+	1.52721	0.0297021	0.7956	A0A0R0HTR7	Uncharacterized protein	6	3	76.9	8.28	at4g24010	10.2.1	cell wall.cellulose synthesis.cellulose synthase
+	2.22348	0.00597757	0.793978	I1KYL4	ER membrane protein complex subunit 3	26	5	27.8	8.97	at4g12590	35.2	not assigned.unknown
+	2.21875	0.00604298	0.79	K7MHI8	G-patch domain-containing protein	7	3	98.7	5.74	at1g17070	35.1	not assigned.no ontology
+	2.60421	0.00248764	0.789816	A0A0R0G0T0	PfkB domain-containing protein	33	9	37.9	5.63	at5g51830	2.2.1.1	major CHO metabolism.degradation.sucrose.fructokinase
+	3.44391	0.000359823	0.784638	A0A0R0J624	Uncharacterized protein	10	2	27.2	10.08	at4g05400	35.2	not assigned.unknown
+	1.71758	0.0191613	0.782957	C6SXW1	Peptide-methionine (R)-S-oxide reductase (EC 1.8.4.12)	41	3	15.1	6.74	at4g04830	27.3.67	RNA.regulation of transcription.putative transcription regulator
	1.3403	0.0456778	0.782292	I1MYR9	Uncharacterized protein	24	3	20	10.36	at4g39880	29.2.1.99.2.23	protein.synthesis.ribosomal protein.unknown.large subunit.L23
+	2.24104	0.00574063	0.781346	A0A0R0IVF1	Uncharacterized protein	23	7	48	8.22	at5g11420	35.2	not assigned.unknown
	1.46361	0.0343863	0.776045	I1M307	Bulb-type lectin domain-containing protein	19	7	48.8	6.64	at1g78850	26.16	misc.myrosinases-lectin-jacalin
+	1.64891	0.0224435	0.774607	I1MBI9	Peroxidase (EC 1.11.1.7)	26	7	40	9.54	at5g05340	26.12	misc.peroxidases
+	1.80506	0.0156655	0.768847	I1MYV2	SAP domain-containing protein	14	6	78	4.74	at4g39680	27.3.67	RNA.regulation of transcription.putative transcription regulator
+	1.76239	0.0172827	0.76463	I1KEY3	J domain-containing protein	19	4	38.4	9.04	at2g20560	20.2.1	stress.abiotic.heat
+	1.78736	0.0163171	0.762532	C6SY82	Eukaryotic translation initiation factor 5A (eIF-5A)	22	3	17.3	6.2	at1g13950	29.2.3	protein.synthesis.initiation
	1.4228	0.0377747	0.758793	C6SW77	Uncharacterized protein	34	5	25.8	9.69	at1g01820	31.1	cell.organisation
	1.30603	0.0494274	0.758606	I1L999	Uncharacterized protein	12	2	19.2	9.86	at1g28510	35.2	not assigned.unknown
+	4.15495	6.99915e-05	0.754958	I1L2S8	Uncharacterized protein	10	2	33.2	4.63	at2g43630	35.2	not assigned.unknown
	1.50816	0.0310338	0.751688	I1K811	Uncharacterized protein	13	4	51.3	6.52	at5g42830	16.2	secondary metabolism.phenylpropanoids
	1.36898	0.0427579	0.750497	K7MP42	Ubiquitin-like domain-containing protein	14	9	98.7	5.43	at5g42220	29.2.3	protein.synthesis.initiation
	1.36019	0.0436327	0.748829	I1MMG2	Uncharacterized protein	20	5	40.8	5.92	at1g47128	29.5.3	protein.degradation.cysteine protease
+	1.9836	0.0103849	0.746452	Q9LLQ6	Seed maturation protein PM34	71	17	31.7	7.08	at1g54870	26.22	misc.short chain dehydrogenase/reductase (SDR)
+	3.51716	0.000303976	0.745441	A0A0R0JRB0	L-lactate dehydrogenase (EC 1.1.1.27)	51	10	37.8	7.02	at4g17260	5.1	fermentation.LDH
+	2.71473	0.00192871	0.738313	C6TD56	Glyceraldehyde-3-phosphate dehydrogenase (EC 1.2.1.-)	69	17	37	7.47	at3g04120	4.1.9	glycolysis.cytosolic branch.glyceraldehyde 3-phosphate dehydrogenase (GAP-DH)
+	2.64549	0.00226208	0.737745	I1JSN6	Usp domain-containing protein	24	2	19.9	6.33	at2g21620	20.2.99	stress.abiotic.unspecified
+	3.44338	0.00036026	0.733336	I1LJN2	Uncharacterized protein	33	8	49.2	6.3	at1g08450	30.3	signalling.calcium
	1.44722	0.0357091	0.733064	I1NBW7	Pescadillo homolog	8	2	69.2	8.84	at5g14520	33.99	development.unspecified
+	2.25798	0.00552106	0.732881	C6TN05	Hypersensitive induced reaction protein 4	12	2	32.6	5.31	at5g51570	35.1	not assigned.no ontology
+	3.12737	0.00074581	0.730677	I1JVB1	Uncharacterized protein	38	2	10.3	10.05	at5g40080	29.2.1.2.2.99	protein.synthesis.ribosomal protein.eukaryotic.60S subunit.unknown
+	1.71632	0.0192168	0.727898	I1KMB5	Uncharacterized protein	9	2	42.3	5.64	at1g30480	28.2	DNA.repair
+	2.12616	0.00747898	0.726259	K7L479	J domain-containing protein	8	4	103.3	6.55	at4g12770	31.4	cell.vesicle transport
+	2.23368	0.00583871	0.725345	I1KDR0	Uncharacterized protein	64	16	57.1	5.39	at3g15180	29.5.11.20	protein.degradation.ubiquitin.proteasom
+	1.8166	0.0152544	0.719959	C6T321	Clat_adaptor_s domain-containing protein	21	2	19.7	4.86	at3g09800	29.3.4.99	protein.targeting.secretory pathway.unspecified
+	2.63865	0.00229801	0.719741	C6TB70	Thioredoxin domain-containing protein	56	7	24.4	6.92	at1g48130	21.5.2	redox.peroxiredoxin.PER1
+	1.67922	0.0209304	0.719691	A0A0R0EF73	Uncharacterized protein	8	8	183.5	6.18	at5g27970	35.2	not assigned.unknown
+	2.93755	0.00115466	0.719509	I1JXA0	Uncharacterized protein	54	33	90.8	5.24	at5g03340	31.2	cell.division
+	3.18647	0.000650922	0.718699	C6SWV3	Uncharacterized protein	66	11	27.6	6.1	at5g45690	35.2	not assigned.unknown
+	1.90317	0.0124976	0.716146	B6ZJZ9	Peroxisomal adenine nucleotide carrier 1 (GmPNC1)	15	3	34.7	9.69	at3g05290	34.9	transport.metabolite transporters at the mitochondrial membrane
+	1.84531	0.0142786	0.715307	C6T9Z5	Formate dehydrogenase, mitochondrial (FDH) (EC 1.17.1.9) (NAD-dependent formate dehydrogenase)	58	15	42.8	6.77	at5g14780	25.1	C1-metabolism.formate dehydrogenase
+	1.83836	0.0145092	0.710772	I1KDI8	MI domain-containing protein	13	7	85.2	6.95	at5g57870	29.2.3	protein.synthesis.initiation
+	3.61752	0.000241254	0.708783	A0A0R4J309	Uncharacterized protein	37	5	18.6	10.51	at1g09690	29.2.1.2.2.21	protein.synthesis.ribosomal protein.eukaryotic.60S subunit.L21
+	3.58584	0.000259513	0.707412	C6SVF6	Glutaredoxin domain-containing protein	90	7	11.3	6.52	at5g40370	21.4	redox.glutaredoxins
	1.31197	0.0487566	0.705298	I1LD03	Dolichyl-diphosphooligosaccharide--protein glycosyltransferase subunit 1	29	9	52.7	7.31	at2g01720	29.7	protein.glycosylation
	1.37417	0.0422507	0.699079	I1M8B3	Uncharacterized protein	6	4	78.6	5.43	at1g19520	35.1.5	not assigned.no ontology.pentatricopeptide (PPR) repeat-containing protein
+	3.52245	0.000300296	0.695166	C6TK30	60S ribosomal protein L36	23	2	12.4	11.31	at5g02450	29.2.1.2.2.36	protein.synthesis.ribosomal protein.eukaryotic.60S subunit.L36
+	1.69574	0.0201492	0.695001	I1LP75	AAA domain-containing protein	7	4	68.4	9.29	at3g03060	29.5.11.20	protein.degradation.ubiquitin.proteasom
+	2.35164	0.00444997	0.690764	I1M3A7	Uncharacterized protein	12	3	63.8	5.73	at3g15410	35.1	not assigned.no ontology
+	1.66145	0.0218047	0.687236	C6T470	Uncharacterized protein	16	2	27.2	4.81	at3g03490	31.1	cell.organisation
+	1.96599	0.0108145	0.686838	C6TFN8	Uncharacterized protein	12	2	20.9	8.46	at5g38890	35.1	not assigned.no ontology
+	3.5248	0.000298679	0.685971	I1LCQ1	Pyruvate kinase (EC 2.7.1.40)	36	14	57.8	7.36	at3g52990	4.1.15	glycolysis.cytosolic branch.pyruvate kinase (PK)
	1.49733	0.0318177	0.685151	I1KQG0	T-complex protein 1 subunit delta	66	22	57.6	7.28	at3g18190	29.6	protein.folding
+	2.47781	0.00332808	0.683859	I1NHP3	Uncharacterized protein	25	2	15.6	9.09	at3g52230	35.2	not assigned.unknown
+	2.18311	0.00655983	0.682904	I1LTT3	Uncharacterized protein	89	5	11.2	4.37	at3g44590	29.2.1.2.2.82	protein.synthesis.ribosomal protein.eukaryotic.60S subunit.P2
	1.44919	0.0355475	0.681551	C6SWA6	Histone H2A	46	4	15.7	10.67	at5g02560	28.1.3	DNA.synthesis/chromatin structure.histone
+	1.90061	0.0125715	0.679855	I1KSL3	Uncharacterized protein	7	3	89.9	5.55	at1g29370	29.4	protein.postranslational modification
	1.40423	0.0394247	0.677878	I1K1V3	Uncharacterized protein	16	2	17.3	5.3	at3g22480	29.6	protein.folding
+	2.36824	0.00428313	0.676391	I1NBP5	Glucose-6-phosphate 1-dehydrogenase (EC 1.1.1.49)	5	2	68	6.84	at1g09420	7.1.1	OPP.oxidative PP.G6PD
+	2.04836	0.00894621	0.675854	K7MBG3	Sucrose synthase (EC 2.4.1.13)	27	17	91.5	6.24	at5g49190	2.2.1.5	major CHO metabolism.degradation.sucrose.Susy
+	1.87019	0.0134838	0.675637	Q84ZV2	Uncharacterized protein	33	2	11.3	9.13	at1g55805	35.1	not assigned.no ontology
+	2.21118	0.00614922	0.674481	Q9MAZ9	Nonclathrin coat protein zeta1-COP	46	4	20.1	4.86	at1g60970	29.3.4.99	protein.targeting.secretory pathway.unspecified
	1.3946	0.0403088	0.673209	I1MY42	Uncharacterized protein	2	2	135.6	7.58	at1g27940	34.16	transport.ABC transporters and multidrug resistance systems
+	2.06999	0.00851151	0.673115	A0A0R0HN41	Uncharacterized protein (Fragment)	61	4	12	4.46	at4g15802	35.2	not assigned.unknown
+	1.64494	0.0226497	0.67207	I1M5H3	Nuclear pore complex protein NUP35 (Nucleoporin 35)	21	3	36.2	9.23	at3g16310	35.1	not assigned.no ontology
+	1.93905	0.0115068	0.670543	I1L0S5	Uncharacterized protein	40	5	19	6.93	at4g16160	29.3.2	protein.targeting.mitochondria
	1.37724	0.0419522	0.667328	C6SW70	Uncharacterized protein	42	11	28.2	9.88	at3g13580	29.2.1.2.2.7	protein.synthesis.ribosomal protein.eukaryotic.60S subunit.L7
+	1.88235	0.0131114	0.662715	I1NDE9	Uncharacterized protein	24	8	54.4	4.73	at5g37340	27.3.99	RNA.regulation of transcription.unclassified
+	1.72806	0.0187043	0.660158	C6T4V0	Uncharacterized protein	60	2	8	4.53	at3g52420	29.3.3	protein.targeting.chloroplast
+	1.88291	0.0130946	0.659226	I1J8U6	AAA domain-containing protein	8	3	70.3	8.1	at2g18330	29.5.9	protein.degradation.AAA type
+	3.13563	0.00073177	0.657844	K7MNV4	Uncharacterized protein	21	3	22.1	5.22	at5g42770	35.1	not assigned.no ontology
	1.4124	0.0386898	0.657828	I1M860	TOG domain-containing protein	16	4	37.8	5.31	at5g14790	35.2	not assigned.unknown
+	1.85599	0.0139318	0.656343	I1KVZ9	Bet_v_1 domain-containing protein	70	9	17.6	5.68	at1g70890	20.2.99	stress.abiotic.unspecified
+	2.83341	0.00146753	0.655527	I1MT10	Uncharacterized protein	54	26	70.8	5.39	at1g16030	20.2.1	stress.abiotic.heat
	1.34584	0.0450985	0.654765	I1JR04	Tr-type G domain-containing protein	6	3	77.1	8.19	at4g11160	29.2.3	protein.synthesis.initiation
+	2.12249	0.00754235	0.650188	I1MUN3	Nop domain-containing protein	33	13	61.1	8.43	at1g56110	27.3.67	RNA.regulation of transcription.putative transcription regulator
+	1.76575	0.0171494	0.648901	A0A0R0I4F6	Uncharacterized protein	56	15	31.8	7.36	at1g54870	26.22	misc.short chain dehydrogenase/reductase (SDR)
+	2.35518	0.0044139	0.6483	I1KQ89	PMEI domain-containing protein	23	3	22.8	5.57	at1g14890	26.18	misc.invertase/pectin methylesterase inhibitor family protein
+	2.12747	0.00745649	0.646857	C6T588	Bet_v_1 domain-containing protein	61	7	16.8	4.88	at1g24020	20.2.99	stress.abiotic.unspecified
	1.4056	0.0393011	0.631913	A0A0R0L1W4	Glycosyltransferase (EC 2.4.1.-)	16	5	56.7	6.58	at5g12890	26.2	misc.UDP glucosyl and glucoronyl transferases
+	2.56894	0.00269812	0.631711	C6T2R8	Uncharacterized protein	25	5	25	5.57	at1g78380	26.9	misc.glutathione S transferases
	1.31876	0.048	0.630563	K7KUE2	Uncharacterized protein	20	7	83.7	4.98	at4g08550	21.4	redox.glutaredoxins
	1.36281	0.0433698	0.629915	I1LD65	Dihydrolipoamide acetyltransferase component of pyruvate dehydrogenase complex (EC 2.3.1.-)	34	9	48.9	8.82	at1g34430	8.1.1.2	TCA / org. transformation.TCA.pyruvate DH.E2
	1.57466	0.026628	0.625288	I1JZL5	Flavin-containing monooxygenase (EC 1.-.-.-)	35	9	52.2	5.63	at5g61290	26.7	misc.oxidases - copper, flavone etc.
	1.46913	0.0339526	0.622739	I1N8H9	Uncharacterized protein	4	4	148.8	4.35	at5g17910	35.2	not assigned.unknown
+	2.58625	0.00259268	0.618309	I1LA46	Uncharacterized protein	25	5	30.6	6.68	at3g10300	30.3	signalling.calcium
+	3.11026	0.000775788	0.615719	I1N5S0	Formate dehydrogenase, mitochondrial (FDH) (EC 1.17.1.9) (NAD-dependent formate dehydrogenase)	72	17	42.8	6.77	at5g14780	25.1	C1-metabolism.formate dehydrogenase
	1.35558	0.044098	0.615386	C6SVE0	Eukaryotic translation initiation factor 5A (eIF-5A)	30	4	17.4	5.76	at1g13950	29.2.3	protein.synthesis.initiation
+	2.86654	0.00135975	0.614209	I1J7G5	Uncharacterized protein	47	5	18.6	5.02	at5g01300	35.1	not assigned.no ontology
+	1.8971	0.0126736	0.608404	I1MRJ8	Uncharacterized protein	14	8	78.9	8.68	at3g06860	11.9.4.9	lipid metabolism.lipid degradation.beta-oxidation.multifunctional
+	3.53595	0.000291106	0.602412	C6TDW7	Uncharacterized protein	15	4	25.5	8.16	at3g51610	35.2	not assigned.unknown
	1.36045	0.043606	0.600897	I1M5Q4	ADP,ATP carrier protein	17	7	67.5	9.5	at1g80300	34.99	transport.misc
+	2.05161	0.00887948	0.600696	C6SVD3	Peptidylprolyl isomerase (EC 5.2.1.8)	23	2	12	6.01	at5g64350	29.6	protein.folding
	1.34902	0.0447696	0.598785	I1M595	Uncharacterized protein	17	2	19.8	9.5	at1g72750	29.3.2	protein.targeting.mitochondria
+	2.54281	0.00286543	0.598315	I1MMM3	Uncharacterized protein	30	4	23.3	7.11	at5g11680	35.2	not assigned.unknown
	1.69614	0.020131	0.597044	I1KRB3	FAD-binding PCMH-type domain-containing protein	8	4	64	7.31	at4g20840	26.8	misc.nitrilases, *nitrile lyases, berberine bridge enzymes, reticuline oxidases, troponine reductases
	1.54197	0.0287099	0.597012	I1MCM4	RanBD1 domain-containing protein	14	4	48.1	4.91	at1g52380	30.5	signalling.G-proteins
+	2.74097	0.00181566	0.594136	A0A2Z6BYW7	Glycosyltransferase	54	16	53.6	6.16	at2g22590	16.8.1	secondary metabolism.flavonoids.anthocyanins
+	2.27316	0.00533143	0.593577	I1L1F3	Uncharacterized protein	38	7	28.3	9.83	at2g01250	29.2.1.2.2.7	protein.synthesis.ribosomal protein.eukaryotic.60S subunit.L7
+	1.72459	0.0188541	0.59179	I1M984	AA_TRNA_LIGASE_II domain-containing protein	45	19	60.2	6.1	at4g31180	29.1.12	protein.aa activation.aspartate-tRNA ligase
+	1.7812	0.0165499	0.591341	I1LS05	Uncharacterized protein	34	7	45.8	7.02	at2g20770	35.1	not assigned.no ontology
	1.53972	0.0288591	0.590068	I1JQD8	UBA domain-containing protein	14	3	45.2	7.21	at3g58460	29.5.11.3	protein.degradation.ubiquitin.E2
	1.64974	0.0224005	0.585168	K7KMV4	Uncharacterized protein	2	2	124.2	5.91	at5g09840	35.2	not assigned.unknown
+	1.95243	0.0111575	-0.58723	C6SYK2	Uncharacterized protein	38	5	22.4	5.07	at1g73325	20.1.7.6.1	stress.biotic.PR-proteins.proteinase inhibitors.trypsin inhibitor
	1.47187	0.0337388	-0.589449	I1J940	RPW8 domain-containing protein	6	3	94.5	6.51	at5g66900	20.1.7	stress.biotic.PR-proteins
+	2.38209	0.00414865	-0.591465	A0A0R0J0J8	Uncharacterized protein	25	3	30.1	7.49	at2g39780	27.1.19	RNA.processing.ribonucleases
	1.48736	0.0325568	-0.592916	I1LJE0	Adenylyl cyclase-associated protein	28	8	50.6	6.8	at4g34490	28.99	DNA.unspecified
+	3.02883	0.000935776	-0.593047	A0A0R0KIF2	Importin N-terminal domain-containing protein	35	16	86.6	4.75	at5g53480	29.3.1	protein.targeting.nucleus
+	1.774	0.0168266	-0.593067	A0A368UHG2	NAD(P)-bd_dom domain-containing protein	59	13	38.7	7.9	at2g28760	10.1.5	cell wall.precursor synthesis.UXS
	1.30278	0.0497986	-0.593626	I1L4U2	Serine hydroxymethyltransferase (EC 2.1.2.1)	55	15	57	7.59	at4g37930	25.1	C1-metabolism.glycine hydroxymethyltransferase
	1.65827	0.0219648	-0.59424	I1JRY5	Uncharacterized protein	20	5	37.4	9.55	at4g01100	34.9	transport.metabolite transporters at the mitochondrial membrane
+	2.20716	0.0062064	-0.59518	I1JXR7	Exostosin domain-containing protein	12	3	47.1	6.65	at5g61840	26.2	misc.UDP glucosyl and glucoronyl transferases
	1.52206	0.0300564	-0.596133	C6SVK3	PITH domain-containing protein	21	2	22.7	5.27	at2g25950	35.2	not assigned.unknown
	1.39717	0.0400713	-0.599715	C6T8I2	Aminotran_1_2 domain-containing protein	38	11	43.6	5.77	at1g80360	13.1.6.2	amino acid metabolism.synthesis.aromatic aa.phenylalanine and tyrosine
+	3.44455	0.000359291	-0.60044	I1KJR7	Uncharacterized protein	17	3	28.4	4.86	at4g29260	26.13	misc.acid and other phosphatases
+	1.75562	0.0175543	-0.60065	K7LW22	Ubiquitin-like domain-containing protein	4	3	116.7	7.56	at4g03430	27.1.1	RNA.processing.splicing
+	1.9869	0.0103062	-0.603463	I1JZM5	Uncharacterized protein	7	2	51.5	6.76	at5g07720	26.2	misc.UDP glucosyl and glucoronyl transferases
	1.63313	0.0232739	-0.604328	C6SW65	Uncharacterized protein	24	3	20.1	8.7	at3g61260	27.3.67	RNA.regulation of transcription.putative transcription regulator
	1.56177	0.02743	-0.605397	I1NBW2	Serine/threonine-protein phosphatase (EC 3.1.3.16)	32	7	42.7	7.78	at5g27840	29.4	protein.postranslational modification
	1.60415	0.0248801	-0.607775	I1KP26	Mg-por_mtran_C domain-containing protein	11	3	35.2	7.44	at4g25080	19.11	tetrapyrrole synthesis.magnesium protoporphyrin IX methyltransferase
	1.42046	0.0379789	-0.608274	Q2PMU2	Photosystem I P700 chlorophyll a apoprotein A2 (EC 1.97.1.12) (PSI-B) (PsaB)	19	9	82.4	7.31	atcg00340	1.1.2.2	PS.lightreaction.photosystem I.PSI polypeptide subunits
	1.41775	0.0382162	-0.608594	K7M8I6	Uncharacterized protein	6	3	60.9	6.55	at1g76040	30.3	signalling.calcium
	1.60047	0.0250916	-0.608798	C6TJL7	Xyloglucan endotransglucosylase/hydrolase (EC 2.4.1.207)	21	4	34.2	8.21	at2g36870	10.7	cell wall.modification
+	3.22723	0.000592607	-0.610121	C6SY33	Uncharacterized protein	11	2	25.9	8.51	at4g11060	27.3.99	RNA.regulation of transcription.unclassified
+	2.16296	0.0068713	-0.611361	C6THB9	Uncharacterized protein	43	12	45.6	6.35	at5g22060	20.2.1	stress.abiotic.heat
	1.33037	0.0467341	-0.611885	I1JJV5	Protein kinase domain-containing protein	28	9	57.9	6.18	at4g35230	29.4.1.52	protein.postranslational modification.kinase.receptor like cytoplasmatic kinase II
	1.58118	0.0262312	-0.61591	Q8S5C1	4-coumarate:CoA ligase isoenzyme 2 (EC 6.2.1.12)	27	11	60.1	6.74	at3g21240	16.2.1.3	secondary metabolism.phenylpropanoids.lignin biosynthesis.4CL
+	2.46807	0.00340357	-0.615944	C6TMK2	Uncharacterized protein	17	3	31.9	9.26	at3g12800	26.22	misc.short chain dehydrogenase/reductase (SDR)
+	2.33713	0.00460117	-0.618098	A0A0R0KVT1	Uncharacterized protein	39	5	26.1	5.8	at3g53620	23.4.99	nucleotide metabolism.phosphotransfer and pyrophosphatases.misc
	1.56787	0.0270478	-0.618398	A0A0R0JQA9	X8 domain-containing protein	19	2	21.5	7.24	at1g18650	26.4	misc.beta 1,3 glucan hydrolases
+	2.37717	0.00419592	-0.621399	A0A0R4J3N6	Uncharacterized protein	6	2	41.3	5.34	at5g54160	16.2.1.9	secondary metabolism.phenylpropanoids.lignin biosynthesis.COMT
+	2.57495	0.00266101	-0.622944	I1L5K6	Carboxypeptidase (EC 3.4.16.-)	22	6	55.6	6.71	at3g63470	29.5.5	protein.degradation.serine protease
	1.53097	0.0294466	-0.623705	I1KZI6	ENTH domain-containing protein	7	3	98.5	5.87	at2g43160	35.1.21	not assigned.no ontology.epsin N-terminal homology (ENTH) domain-containing protein
+	1.98625	0.0103216	-0.62513	I1K5J8	Uncharacterized protein	26	10	69.3	7.87	at1g14830	26.17	misc.dynamin
	1.53654	0.0290707	-0.626856	I1K380	Uncharacterized protein	13	3	40.2	7.24	at2g17120	35.1	not assigned.no ontology
	1.48712	0.0325746	-0.627488	I1L295	Uncharacterized protein	4	2	60.1	6.64	at2g12400	35.2	not assigned.unknown
+	2.80288	0.00157443	-0.628909	I1JST6	RING-type E3 ubiquitin transferase (EC 2.3.2.27)	10	5	89.2	5.31	at1g76390	29.5.11.4.2	protein.degradation.ubiquitin.E3.RING
	1.53943	0.0288782	-0.629054	Q1WCP1	Cytochrome P450 monooxygenase CYP94D24 (Fragment)	6	2	39.3	9.22	at3g56630	26.1	misc.cytochrome P450
+	2.21465	0.00610023	-0.631569	C6TL49	Protein kinase domain-containing protein	13	4	33.9	8.13	at3g48750	31.3	cell.cycle
+	2.50302	0.00314037	-0.632892	I1K6N8	ThiF domain-containing protein	17	3	36.8	5.86	at5g50680	29.5.11	protein.degradation.ubiquitin
+	2.42036	0.00379876	-0.633789	C6TNQ1	Fe2OG dioxygenase domain-containing protein	41	8	34.9	5.31	at1g77330	17.5.1.2	hormone metabolism.ethylene.synthesis-degradation.1-aminocyclopropane-1-carboxylate oxidase
+	2.2141	0.00610804	-0.634122	I1M9P8	X8 domain-containing protein	12	3	53	6.77	at4g31140	26.4	misc.beta 1,3 glucan hydrolases
+	2.46066	0.00346213	-0.636063	I1LST9	Uncharacterized protein	9	4	66.7	6.29	at3g14920	35.2	not assigned.unknown
+	2.14184	0.00721368	-0.636834	A0A0R0H975	Apocytochr_F_N domain-containing protein	34	7	35.3	8.82	atcg00540	1.1.3	PS.lightreaction.cytochrome b6/f
+	2.78953	0.00162355	-0.641504	A0A0R0GFB2	Uncharacterized protein	54	18	57.5	8.87	at2g44480	26.3	misc.gluco-, galacto- and mannosidases
+	3.46197	0.000345165	-0.645826	C6SVL3	Phytocyanin domain-containing protein	16	2	19.3	6.93	at2g25060	26.19	misc.plastocyanin-like
+	2.77548	0.00167696	-0.646973	I1L5G4	Amidophosphoribosyltransferase (ATase) (EC 2.4.2.14) (Glutamine phosphoribosylpyrophosphate amidotransferase)	27	11	62	6.84	at2g16570	23.1.2.1	nucleotide metabolism.synthesis.purine.amidophosphoribosyltransferase
+	1.8927	0.0128025	-0.648483	I1KM16	Uncharacterized protein	64	13	28.1	5.68	at4g34050	16.2.1.6	secondary metabolism.phenylpropanoids.lignin biosynthesis.CCoAOMT
+	2.0144	0.00967378	-0.649999	C6T8H5	Tubulin gamma chain	11	3	53.1	5.94	at3g61650	31.1	cell.organisation
+	2.66608	0.00215737	-0.651511	I1MVC1	Uncharacterized protein	41	15	69.4	8.35	at4g18030	20.2.3	stress.abiotic.drought/salt
+	2.56493	0.00272316	-0.652928	A0A0R0EQE5	Uncharacterized protein	33	16	70.3	6.04	at1g04430	20.2.3	stress.abiotic.drought/salt
	1.40471	0.0393815	-0.654876	I1JR44	Uncharacterized protein	20	3	18.6	6.8	at1g09310	35.2	not assigned.unknown
	1.43048	0.0371129	-0.655012	I1J4T0	t-SNARE coiled-coil homology domain-containing protein	12	2	30.1	6.1	at5g46860	31.4	cell.vesicle transport
+	1.89301	0.0127935	-0.655087	I1MVN5	Peroxidase (EC 1.11.1.7)	66	13	35.5	9	at5g67400	26.12	misc.peroxidases
+	1.85579	0.0139384	-0.657445	C6TL29	Phosphoribulokinase (EC 2.7.1.19)	23	6	45.3	6.28	at1g32060	1.3.12	PS.calvin cyle.PRK
+	1.62902	0.0234953	-0.659349	C6T2H1	Flavodoxin-like domain-containing protein	57	8	21.7	6.95	at4g27270	11.8	lipid metabolism.''exotics'' (steroids, squalene etc)
+	2.01762	0.00960245	-0.660225	I1LI96	Phosphoserine aminotransferase (EC 2.6.1.52)	32	10	45	7.94	at4g35630	13.1.5.1.2	amino acid metabolism.synthesis.serine-glycine-cysteine group.serine.phosphoserine aminotransferase
+	1.85121	0.0140862	-0.660703	A0A0R4J307	Uncharacterized protein	17	3	25.4	6.51	at2g36830	34.19.2	transport.Major Intrinsic Proteins.TIP
	1.48063	0.033065	-0.663866	I1L367	Uncharacterized protein	46	12	55.7	6.34	at3g48990	11.1.8	lipid metabolism.FA synthesis and FA elongation.acyl coa ligase
+	2.92811	0.00118003	-0.665281	I1J547	Aminotran_1_2 domain-containing protein	35	11	53.5	5.69	at1g70580	1.2.3	PS.photorespiration.aminotransferases peroxisomal
	1.43421	0.0367954	-0.665388	C6T2V7	Phytocyanin domain-containing protein	18	2	26.1	4.87	at1g08500	26.19	misc.plastocyanin-like
+	1.6512	0.0223256	-0.670978	I1KUQ6	Lipoxygenase (EC 1.13.11.-)	26	15	97.1	7.4	at1g55020	17.7.1.2	hormone metabolism.jasmonate.synthesis-degradation.lipoxygenase
+	1.91686	0.0121099	-0.671056	I1MU50	ENTH domain-containing protein	16	4	60.8	6.29	at5g35200	35.1.21	not assigned.no ontology.epsin N-terminal homology (ENTH) domain-containing protein
	1.55712	0.0277254	-0.673255	I1K7Q8	NmrA domain-containing protein	60	12	34.2	6.06	at4g39230	16.8.5	secondary metabolism.flavonoids.isoflavonols
+	1.75529	0.0175676	-0.675785	I1LQ56	Flavodoxin-like domain-containing protein	26	5	27.1	5.99	at4g36750	11.8	lipid metabolism.''exotics'' (steroids, squalene etc)
	1.51105	0.0308283	-0.676295	A0A0R0LB64	Uncharacterized protein	44	10	34.2	9.29	at4g00430	34.19.1	transport.Major Intrinsic Proteins.PIP
	1.45384	0.0351691	-0.676931	I1JL58	PRA1 family protein	11	2	24.2	8.19	at2g38360	31.4	cell.vesicle transport
+	1.79953	0.0158661	-0.677368	I1LRA7	Carboxypeptidase (EC 3.4.16.-)	28	7	51	5.52	at2g27920	29.5	protein.degradation
	1.4244	0.0376357	-0.678891	I1K498	Ferredoxin	29	3	15.8	4.55	at1g60950	1.1.5.2	PS.lightreaction.other electron carrier (ox/red).ferredoxin
+	2.7552	0.00175713	-0.679062	I1LU10	Uncharacterized protein	46	13	46.3	6.3	at5g22060	20.2.1	stress.abiotic.heat
+	1.78974	0.016228	-0.680039	A0A0R0KVX2	Fe2OG dioxygenase domain-containing protein	15	3	39.7	6.84	at4g10500	35.1	not assigned.no ontology
+	3.01738	0.000960772	-0.68061	K7K5P1	J domain-containing protein	31	5	27.1	5.5	at1g76700	20.2.1	stress.abiotic.heat
	1.52428	0.029903	-0.682355	A0A368UKJ9	Pyruvate kinase (EC 2.7.1.40)	34	12	63.3	7.59	at5g52920	4.2.15	glycolysis.plastid branch.pyruvate kinase (PK)
+	1.6733	0.0212177	-0.684791	I1MUR9	GMC_OxRdtase_N domain-containing protein	6	3	62.9	6.84	at1g12570	35.1	not assigned.no ontology
+	2.64055	0.00228797	-0.68482	K7MMN7	FAD-binding PCMH-type domain-containing protein	7	4	66.1	8.07	at5g11540	35.1	not assigned.no ontology
+	1.87093	0.0134608	-0.689229	I1J4P0	TFIIS N-terminal domain-containing protein	5	2	57.6	5.38	at1g32130	27.3.99	RNA.regulation of transcription.unclassified
+	2.32851	0.00469341	-0.689353	I1K5M5	AP-3 complex subunit delta	4	3	108.7	6.42	at1g48760	31.4	cell.vesicle transport
+	2.4366	0.00365936	-0.690238	A0A0R0HC62	Uncharacterized protein	13	2	20.4	8.43	at3g49870	29.3.4.99	protein.targeting.secretory pathway.unspecified
+	1.64168	0.02282	-0.694358	I1JJP2	Glucose-1-phosphate adenylyltransferase (EC 2.7.7.27) (ADP-glucose pyrophosphorylase)	35	11	56.3	6.74	at5g48300	2.1.2.1	major CHO metabolism.synthesis.starch.AGPase
+	2.83595	0.00145899	-0.694526	A0A0R4J5R0	Fe2OG dioxygenase domain-containing protein	19	4	37	5.88	at3g50210	16.8.4	secondary metabolism.flavonoids.flavonols
	1.34986	0.0446832	-0.696598	I1MR46	Uncharacterized protein	23	8	62	9.41	at4g22010	26.7	misc.oxidases - copper, flavone etc.
	1.32794	0.0469962	-0.703111	I1K4M6	C2 domain-containing protein	28	36	229.2	5.36	at2g22125	35.1.19	not assigned.no ontology.C2 domain-containing protein
+	1.70578	0.0196888	-0.703645	A0A0R0KAJ9	Uncharacterized protein	6	3	58.8	6.96	at1g16020	35.2	not assigned.unknown
+	4.67599	2.10868e-05	-0.712445	I1JGA0	Calcium-transporting ATPase (EC 7.2.2.10)	16	10	113.9	6.11	at3g57330	30.3	signalling.calcium
+	1.64644	0.0225717	-0.713705	I1K675	TPR_REGION domain-containing protein	16	7	61.5	5.4	at4g10840	31.1	cell.organisation
	1.43386	0.0368248	-0.718194	C6ZS11	Leucine-rich repeat resistance protein-like protein	12	3	37.1	8.38	at5g61240	20.1	stress.biotic
+	4.93696	1.15622e-05	-0.724177	K7MKC7	SRP54 domain-containing protein	14	5	68.7	8.18	at4g30600	29.3.4.99	protein.targeting.secretory pathway.unspecified
+	2.37719	0.00419575	-0.724382	A0A0R0ESN9	Uncharacterized protein	26	10	76.4	5.07	at5g13560	35.1	not assigned.no ontology
+	2.78696	0.0016332	-0.726321	I1LCX7	RING-type E3 ubiquitin transferase (EC 2.3.2.27)	4	2	68.7	6.05	at3g54850	29.5.11.4.2	protein.degradation.ubiquitin.E3.RING
+	2.3623	0.00434209	-0.731075	I1JQZ6	Pept_C1 domain-containing protein	27	6	39.7	6.27	at1g02305	29.5.3	protein.degradation.cysteine protease
+	2.4002	0.00397926	-0.731991	A0A0R0HNL5	NAB domain-containing protein	2	4	251.2	4.97	at1g03080	29.4	protein.postranslational modification
+	2.12145	0.00756044	-0.733474	I1L2T0	SGL domain-containing protein	10	2	41.3	6.46	at2g01410	35.2	not assigned.unknown
+	2.44075	0.00362453	-0.741722	I1JJW5	Uncharacterized protein	13	4	61.5	5.83	at2g17290	30.3	signalling.calcium
+	2.20985	0.00616809	-0.741904	I1M5C1	LEA_2 domain-containing protein	12	2	27.8	10.23	at1g17620	35.2	not assigned.unknown
	1.50269	0.0314272	-0.750107	Q9ZNZ5	Peroxidase (EC 1.11.1.7) (Fragment)	36	8	38.5	8.13	at1g05260	20.2.2	stress.abiotic.cold
+	2.39397	0.00403674	-0.750544	I1LSM1	Phytocyanin domain-containing protein	20	3	22.8	6.92	at3g20570	26.19	misc.plastocyanin-like
+	1.55543	0.0278338	-0.750801	A0A1V0PL25	Argonaute 5	8	4	103.3	9.57	at2g27880	33.99	development.unspecified
+	1.70691	0.0196377	-0.751023	I1LWX5	Uncharacterized protein	21	6	54.2	7.42	at1g19920	14.1	S-assimilation.APS
+	1.63418	0.0232177	-0.751186	I1LFX6	Uncharacterized protein	20	11	96.9	4.89	at5g16730	35.1	not assigned.no ontology
+	3.16413	0.000685285	-0.753038	A0A0R0GAK0	Uncharacterized protein	48	10	30.6	8.4	at4g00430	34.19.1	transport.Major Intrinsic Proteins.PIP
+	3.37855	0.000418265	-0.756365	I1M6B9	Neutral ceramidase (EC 3.5.1.23)	28	13	84.5	7.24	at1g07380	11.8.1.1	lipid metabolism.''exotics'' (steroids, squalene etc).sphingolipids.ceramidase
+	3.64246	0.000227794	-0.757469	I1KMS7	SMK-1 domain-containing protein	7	4	100	5.39	at3g06670	35.2	not assigned.unknown
+	2.74876	0.00178337	-0.758273	C6T7J2	Uncharacterized protein	12	3	25.1	9.01	at5g22360	31.4	cell.vesicle transport
+	2.17694	0.00665371	-0.762404	I1M712	Oxygen-evolving enhancer protein 2	31	4	28.6	7.87	at1g06680	1.1.1.2	PS.lightreaction.photosystem II.PSII polypeptide subunits
+	1.6518	0.0222948	-0.764808	A0A0R0LAT1	Protein kinase domain-containing protein	10	5	66.4	7.5	at1g48480	30.2.3	signalling.receptor kinases.leucine rich repeat III
+	4.38932	4.0802e-05	-0.765297	K7MU41	Uncharacterized protein	26	10	66.9	8.53	at4g00740	20.2.3	stress.abiotic.drought/salt
+	2.50424	0.00313154	-0.76707	K7MYB6	HP domain-containing protein	33	21	108.4	5.71	at2g41740	31.1	cell.organisation
	1.33145	0.0466174	-0.769311	K7ML47	Phytocyanin domain-containing protein	17	2	25.3	9.72	at5g26330	26.19	misc.plastocyanin-like
+	3.23825	0.000577765	-0.773678	I1N1F9	Aldedh domain-containing protein	56	18	58.3	7.15	at3g48000	5.1	fermentation.aldehyde dehydrogenase
	1.51105	0.0308284	-0.773688	A0A0R0JCW2	Uncharacterized protein	26	7	66.2	6.29	unknown	unknown	unknown
+	1.68534	0.0206377	-0.773969	A0A0R0HXE9	Uncharacterized protein	12	2	18.7	9.99	at2g20260	1.1.2.2	PS.lightreaction.photosystem I.PSI polypeptide subunits
	1.47616	0.0334071	-0.776384	I1JSJ3	Fructose-bisphosphate aldolase (EC 4.1.2.13)	30	8	42.5	6.79	at2g21330	1.3.6	PS.calvin cyle.aldolase
+	1.68071	0.020859	-0.779258	I1KJQ4	Reticulon-like protein	9	3	62.4	8.41	at2g26260	11.8.4	lipid metabolism.''exotics'' (steroids, squalene etc).3-beta hydroxysteroid dehydrogenase/isomerase
	1.35228	0.0444348	-0.780003	A0A0R0LI21	Uncharacterized protein	2	2	232.4	5.64	at4g17330	35.1.2	not assigned.no ontology.agenet domain-containing protein
+	2.2764	0.00529174	-0.78008	I1JBJ9	Endoglucanase (EC 3.2.1.4)	8	2	56.6	9.22	at4g02290	26.3.4	misc.gluco-, galacto- and mannosidases.endoglucanase
	1.31653	0.0482467	-0.783418	C6TK14	FBPase domain-containing protein	10	3	41.7	6.43	at3g55800	1.3.9	PS.calvin cyle.seduheptulose bisphosphatase
+	2.08162	0.00828669	-0.783584	I1KHK4	Protein kinase domain-containing protein	11	4	77.5	6.2	at1g53730	30.2.5	signalling.receptor kinases.leucine rich repeat V
+	2.98148	0.00104357	-0.784338	C6TDP2	Uncharacterized protein	30	8	30.1	7.93	at4g32150	31.4	cell.vesicle transport
+	2.48098	0.00330383	-0.788088	C6TKD0	Fe2OG dioxygenase domain-containing protein	18	2	40.9	6.37	at3g19010	21.2	redox.ascorbate and glutathione
+	2.90886	0.00123351	-0.79168	A0A0R4J4D2	PKS_ER domain-containing protein	56	13	39.1	5.95	at3g19450	16.2.1.10	secondary metabolism.phenylpropanoids.lignin biosynthesis.CAD
+	1.51427	0.0306005	-0.795171	K7MK51	Uncharacterized protein	7	4	87.6	6.98	at4g30020	29.5.1	protein.degradation.subtilases
+	1.55578	0.0278115	-0.797362	I1MRL3	TPR_REGION domain-containing protein	7	2	45.4	7.28	at3g16760	35.1.5	not assigned.no ontology.pentatricopeptide (PPR) repeat-containing protein
	1.31028	0.0489467	-0.797999	I1L327	DUF862 domain-containing protein	19	3	27.2	7.34	at4g25680	35.2	not assigned.unknown
+	1.81355	0.015362	-0.799486	I1MJG6	Uncharacterized protein	12	14	180.4	7.55	at2g31900	31.1	cell.organisation
+	2.95296	0.0011144	-0.799914	A0A0R0JPA1	Beta-galactosidase (EC 3.2.1.23)	26	13	94	7.53	at5g63810	26.3.2	misc.gluco-, galacto- and mannosidases.beta-galactosidase
+	2.71756	0.00191619	-0.799943	K7L6W0	LRRNT_2 domain-containing protein	12	3	37.9	5.81	at3g20820	35.1	not assigned.no ontology
+	1.58066	0.0262628	-0.802487	K7MR59	NAD(P)-bd_dom domain-containing protein	26	8	74.3	6.67	at1g78570	10.1.10	cell wall.precursor synthesis.RHM
+	2.21647	0.00607474	-0.803191	I1NHN6	Uncharacterized protein	10	3	66.2	8.91	at5g04660	26.1	misc.cytochrome P450
+	2.81187	0.00154218	-0.805499	K7MCL5	Flavin-containing monooxygenase (EC 1.-.-.-)	14	4	59.3	7.83	at1g19250	26.7	misc.oxidases - copper, flavone etc.
+	2.10393	0.00787164	-0.807076	I1KW78	Uncharacterized protein	23	8	60.8	9.16	at3g14690	26.1	misc.cytochrome P450
+	1.81324	0.015373	-0.808946	K7LKM1	Peptidase_M28 domain-containing protein	10	5	99.7	7.62	at5g20660	29.5	protein.degradation
+	2.02497	0.00944117	-0.810165	C6TNJ3	S-adenosylmethionine synthase (EC 2.5.1.6)	63	13	42.9	6.14	at3g17390	15.2	metal handling.binding, chelation and storage
+	2.6117	0.00244511	-0.810784	K7LEA7	RING-type domain-containing protein	23	5	39.1	4.6	at3g19950	29.5.11.4.2	protein.degradation.ubiquitin.E3.RING
	1.37056	0.0426029	-0.814291	A0A0R0IM08	Uncharacterized protein	34	5	30.9	8.41	at4g00430	34.19.1	transport.Major Intrinsic Proteins.PIP
+	2.42865	0.00372688	-0.814834	I1MGZ2	Plasma membrane ATPase (EC 7.1.2.1)	40	29	105	6.81	at4g30190	34.1.2	transport.p- and v-ATPases.H+-exporting ATPase
+	2.31835	0.00480447	-0.816265	A0A0R0FLF0	Xyloglucan endotransglucosylase/hydrolase (EC 2.4.1.207)	25	8	40.4	9.25	at5g13870	10.7	cell wall.modification
+	1.78252	0.0164999	-0.818196	I1LCP7	Protein kinase domain-containing protein	7	2	54.8	7.21	at3g10540	29.4	protein.postranslational modification
+	2.41742	0.00382456	-0.818573	C6TGB8	Uncharacterized protein	36	10	46.2	6.1	at3g21190	35.2	not assigned.unknown
+	3.64036	0.000228899	-0.823311	C6TBY6	V-type proton ATPase proteolipid subunit	29	2	16.5	8.46	at4g38920	34.1.1.2	transport.p- and v-ATPases.H+-transporting two-sector ATPase.subunit C
+	1.52161	0.0300879	-0.824473	C6TI82	Methyltransferase (EC 2.1.1.-)	33	9	38.5	6.65	at5g13710	17.3.1.2.2	hormone metabolism.brassinosteroid.synthesis-degradation.sterols.SMT2
+	2.74429	0.00180181	-0.831137	K7LXR3	Uncharacterized protein	6	2	83.1	6.95	at5g15870	20.1	stress.biotic
+	2.96588	0.00108174	-0.832744	I1LIV5	FAD-binding PCMH-type domain-containing protein	47	19	66	8.21	at3g19820	17.3.1.2.8	hormone metabolism.brassinosteroid.synthesis-degradation.sterols.DWF1
+	3.01143	0.000974031	-0.834014	I1L2C2	Transmembrane 9 superfamily member	21	10	74.9	6.18	at5g35160	35.2	not assigned.unknown
+	1.71952	0.0190757	-0.83642	K7KQQ0	Uncharacterized protein	13	2	30.8	7.28	at1g77700	20.1	stress.biotic
+	1.71005	0.0194963	-0.840168	I1N842	Xyloglucan endotransglucosylase/hydrolase (EC 2.4.1.207)	28	7	34.1	7.71	at5g13870	10.7	cell wall.modification
+	3.1904	0.000645059	-0.840325	I1JM18	Transket_pyr domain-containing protein	41	7	39	6.54	at1g55510	13.2.4.1	amino acid metabolism.degradation.branched-chain group.shared
+	3.81272	0.000153915	-0.84038	C6T225	Uncharacterized protein (Fragment)	24	4	22.2	5	at3g54840	30.5	signalling.G-proteins
+	1.70571	0.019692	-0.840461	I1LP66	Uncharacterized protein	17	9	96.7	4.82	at5g16730	35.1	not assigned.no ontology
+	1.66491	0.0216314	-0.841069	I1L4V4	Fn3_like domain-containing protein	24	12	85.1	5.71	at5g10560	10.6.2	cell wall.degradation.mannan-xylose-arabinose-fucose
+	1.94548	0.0113377	-0.842327	K7N544	CMP/dCMP-type deaminase domain-containing protein	26	3	20.6	5.16	at5g28050	23.2	nucleotide metabolism.degradation
+	1.72318	0.0189155	-0.84512	K7L413	Hexosyltransferase (EC 2.4.1.-)	6	3	75.9	8.92	at5g47780	26.2	misc.UDP glucosyl and glucoronyl transferases
+	1.75298	0.017661	-0.846911	A0A0R0JYS9	Peroxidase (EC 1.11.1.7)	60	12	35.5	8.76	at5g67400	26.12	misc.peroxidases
+	2.11399	0.00769157	-0.862851	K7MNN1	Aminotran_1_2 domain-containing protein	12	3	52.8	7.94	at4g36480	11.8.1	lipid metabolism.''exotics'' (steroids, squalene etc).sphingolipids
+	2.90844	0.00123469	-0.864747	I1JSR9	MFS domain-containing protein	12	5	78.7	5.72	at4g35300	34.2	transporter.sugars
+	4.63663	2.30872e-05	-0.868871	C6TEX7	Uncharacterized protein	16	3	28.9	5.96	at1g43130	35.1	not assigned.no ontology
+	1.58459	0.0260261	-0.86983	I1K4S4	Uncharacterized protein	17	3	35.2	9.54	at4g39460	34.9	transport.metabolite transporters at the mitochondrial membrane
+	2.65568	0.00220965	-0.870985	I1KFE9	Uncharacterized protein	30	9	60.1	7.77	at1g76160	35.1	not assigned.no ontology
+	1.58873	0.0257792	-0.876536	C6T3D7	G protein gamma domain-containing protein	35	3	16	5.71	at3g63420	30.5	signalling.G-proteins
+	1.69209	0.0203193	-0.878556	C6TNE6	Chlorophyll a-b binding protein, chloroplastic	53	6	27.9	5.43	at1g29930	1.1.1.1	PS.lightreaction.photosystem II.LHC-II
+	2.26111	0.00548135	-0.881029	I1K0L4	Uncharacterized protein	34	15	71.7	6	at1g12240	2.2.1.3.3	major CHO metabolism.degradation.sucrose.invertases.vacuolar
+	1.95466	0.0111004	-0.883651	C6TFS5	Cytochrome b6-f complex iron-sulfur subunit (EC 7.1.1.6)	32	5	28.4	8.79	at4g03280	1.1.3	PS.lightreaction.cytochrome b6/f
+	2.27542	0.00530366	-0.8865	K7KKK3	Uncharacterized protein	18	4	61	7.44	at5g07830	35.1	not assigned.no ontology
+	1.89486	0.0127391	-0.887205	I1L776	Uncharacterized protein	35	6	39.9	5.29	at5g54160	16.2.1.9	secondary metabolism.phenylpropanoids.lignin biosynthesis.COMT
+	2.41365	0.00385793	-0.887947	Q06765	ADR6 protein (Sali5-4a protein)	52	8	30.4	6.84	at5g25610	20.2.3	stress.abiotic.drought/salt
+	1.57035	0.0268936	-0.888008	B0FPA3	Extracellular Ca2+ sensing receptor	10	2	41.9	9.39	at5g23060	35.2	not assigned.unknown
+	1.76776	0.0170703	-0.889545	A0A0R4J3B7	Lipase_GDSL domain-containing protein	23	4	39.7	4.84	at5g45670	26.28	misc.GDSL-motif lipase
+	2.14046	0.00723675	-0.891445	K7LD67	Uncharacterized protein	67	18	41.7	5.49	at3g53750	31.1	cell.organisation
+	3.45587	0.000350053	-0.892134	A0A0R0IIS3	Cas1_AcylT domain-containing protein	4	2	67.1	8.81	at2g34410	26.5	misc.acyl transferases
	1.34755	0.0449213	-0.892438	A0A368ULH0	Kinesin-like protein	3	2	98.3	7.4	at1g12430	31.1	cell.organisation
+	2.29703	0.00504624	-0.89375	A0A0R0JYY8	Tubulin beta chain	55	22	49.9	5.01	at5g12250	31.1	cell.organisation
+	1.52962	0.0295376	-0.896648	I1M4U9	NAD(P)-bd_dom domain-containing protein	51	11	39.1	8.13	at2g28760	10.1.5	cell wall.precursor synthesis.UXS
+	3.46231	0.000344895	-0.898204	I1JY06	Uncharacterized protein	33	17	91.7	5.31	at5g64030	20.2.3	stress.abiotic.drought/salt
+	2.05394	0.00883192	-0.904131	I1KIJ3	Uncharacterized protein	3	2	117.3	7.12	at2g42010	11.9.3.1	lipid metabolism.lipid degradation.lysophospholipases.phospholipase D
+	3.5818	0.000261938	-0.907303	I1JHV7	Uncharacterized protein	10	2	29.7	7.64	at5g37660	30.2.99	signalling.receptor kinases.misc
+	2.42929	0.00372144	-0.910659	A0A0R4J3V9	Flavodoxin-like domain-containing protein	46	6	21.7	6.54	at5g54500	11.8	lipid metabolism.''exotics'' (steroids, squalene etc)
+	2.34038	0.00456691	-0.911922	I1L340	C2 domain-containing protein	15	3	30.3	5.03	at5g23950	20.2.2	stress.abiotic.cold
+	2.69684	0.00200985	-0.914438	K7M429	Uncharacterized protein	30	10	45.6	6.28	at3g21190	35.2	not assigned.unknown
+	2.10189	0.00790877	-0.921807	A0A0R4J339	Uncharacterized protein	18	6	82.3	8.54	at5g67360	29.5.1	protein.degradation.subtilases
+	2.33204	0.00465545	-0.923378	Q6RUF9	Proline dehydrogenase (EC 1.5.5.2)	9	3	54.4	8.13	at5g38710	13.2.2.2	amino acid metabolism.degradation.glutamate family.proline
+	2.63539	0.00231533	-0.928315	I1KPM9	TPR_REGION domain-containing protein	17	8	63.2	5.41	at4g10840	31.1	cell.organisation
+	2.19087	0.00644368	-0.929057	I1L8N6	Uncharacterized protein	8	2	50	5.78	at5g18520	35.2	not assigned.unknown
+	2.07403	0.00843279	-0.933201	I1KTW4	ALA-interacting subunit	9	2	38.5	9.54	at1g54320	35.1	not assigned.no ontology
+	1.68441	0.0206819	-0.935683	A0A0R0K666	Peptidase A1 domain-containing protein	45	9	47	8.12	at1g09750	27.3.99	RNA.regulation of transcription.unclassified
+	3.25319	0.000558225	-0.939752	I1MC85	Uncharacterized protein	32	10	45.8	5.82	at3g21190	35.2	not assigned.unknown
+	2.88041	0.00131702	-0.940939	G0T437	Purple acid phosphatase (EC 3.1.3.2)	17	7	74.1	6.35	at1g13900	26.13	misc.acid and other phosphatases
+	2.82418	0.00149907	-0.95125	C6TH50	Xyloglucan endotransglucosylase/hydrolase (EC 2.4.1.207)	22	5	35	5.01	at1g11545	10.7	cell wall.modification
+	1.58301	0.0261213	-0.956091	I1KN20	Uncharacterized protein	6	2	54.8	5.15	at5g18580	31.1	cell.organisation
+	1.99201	0.0101858	-0.963036	I1JG92	Uncharacterized protein	12	5	86.3	6.23	at2g41770	35.2	not assigned.unknown
+	2.72271	0.00189361	-0.963611	I1LLM2	Asparagine synthetase [glutamine-hydrolyzing] (EC 6.3.5.4)	51	19	65.2	6.64	at3g47340	13.1.3.1.1	amino acid metabolism.synthesis.aspartate family.asparagine.asparagine synthetase
+	1.68806	0.0205089	-0.965716	C6T487	Uncharacterized protein	19	3	19.8	7.09	at2g24290	35.2	not assigned.unknown
+	1.56859	0.0270029	-0.967997	I1MYV1	C2 domain-containing protein	32	41	228.5	5.5	at2g22125	35.1.19	not assigned.no ontology.C2 domain-containing protein
+	1.90839	0.0123483	-0.969709	I1MDX7	Uncharacterized protein	14	3	31.9	8.15	at5g64260	30.1.1	signalling.in sugar and nutrient physiology
+	3.98903	0.000102559	-0.970595	I1JTX2	Uncharacterized protein	16	3	28.2	9.83	at5g11890	35.2	not assigned.unknown
+	3.25147	0.000560444	-0.972032	I1L6Y8	Protein kinase domain-containing protein	21	11	98	6.01	at3g51550	30.2.16	signalling.receptor kinases.Catharanthus roseus-like RLK1
+	1.89305	0.0127925	-0.972344	I1KBK8	Uncharacterized protein	23	13	91	5.25	at5g64030	20.2.3	stress.abiotic.drought/salt
+	1.72919	0.0186555	-0.972502	I1MBL5	Uncharacterized protein	40	15	57.9	8.75	at2g30490	16.2.1.2	secondary metabolism.phenylpropanoids.lignin biosynthesis.C4H
+	1.52299	0.0299927	-0.975821	I1K8M2	Transmembrane 9 superfamily member	20	9	73.2	7.61	at5g10840	35.2	not assigned.unknown
+	3.27938	0.000525556	-0.977155	I1MQP2	Cellulase domain-containing protein	7	3	56.2	5.62	at5g01930	10.6.2	cell wall.degradation.mannan-xylose-arabinose-fucose
+	1.53823	0.0289582	-0.986269	I1LZN1	Transmembrane 9 superfamily member	17	8	77.5	6.96	at5g35160	35.2	not assigned.unknown
+	2.35126	0.00445388	-0.990928	I1LPL0	FAD-binding PCMH-type domain-containing protein	47	19	66	8.22	at3g19820	17.3.1.2.8	hormone metabolism.brassinosteroid.synthesis-degradation.sterols.DWF1
+	1.90079	0.0125664	-0.993565	A0A0R4J645	Uncharacterized protein	9	2	41.6	5.45	at5g54160	16.2.1.9	secondary metabolism.phenylpropanoids.lignin biosynthesis.COMT
+	2.82053	0.00151172	-0.996018	A0A0R0K0E5	FAD-binding PCMH-type domain-containing protein	10	4	59.2	7.85	at4g20820	26.8	misc.nitrilases, *nitrile lyases, berberine bridge enzymes, reticuline oxidases, troponine reductases
+	2.93804	0.00115335	-0.99766	I1MPK1	Uncharacterized protein	6	2	49.9	5.58	at5g23940	35.1	not assigned.no ontology
+	2.40737	0.00391407	-0.99926	C6SXF0	Uncharacterized protein	23	3	22.6	10.23	at1g74970	29.2.1.1.1.1.9	protein.synthesis.ribosomal protein.prokaryotic.chloroplast.30S subunit.S9
+	1.70001	0.019952	-1.00092	I1KG34	Uncharacterized protein	74	32	68.7	5.5	at1g78900	34.1	transport.p- and v-ATPases
+	1.56569	0.0271838	-1.0047	C6THA9	NAD(P)-bd_dom domain-containing protein	51	11	39.1	8.13	at2g28760	10.1.5	cell wall.precursor synthesis.UXS
+	1.99988	0.0100028	-1.0052	A0A0R0G3L8	Phospho-2-dehydro-3-deoxyheptonate aldolase (EC 2.5.1.54)	22	9	54.9	8.28	at4g33510	13.1.6.1.1	amino acid metabolism.synthesis.aromatic aa.chorismate.3-deoxy-D-arabino-heptulosonate 7-phosphate synthase
+	1.70367	0.0197848	-1.00648	Q39828	Dynamin-related protein 5A (Soybean dynamin-like protein 5A) (SDL5A)	26	13	68.3	7.99	at5g42080	30.5	signalling.G-proteins
+	3.15811	0.000694841	-1.00987	I1KP02	Uncharacterized protein	27	11	65.3	5.05	at1g72160	34.99	transport.misc
+	2.51032	0.00308799	-1.01052	K7M5U1	GH10 domain-containing protein	13	9	103.8	6.95	at1g58370	10.6.2	cell wall.degradation.mannan-xylose-arabinose-fucose
+	3.57372	0.000266857	-1.01253	K7MLF2	AAA domain-containing protein	12	8	132.6	6.61	at4g02480	29.5.9	protein.degradation.AAA type
+	2.15637	0.00697642	-1.01371	C6SY48	Glutathione peroxidase	26	3	18.9	9.07	at2g48150	21.2.2	redox.ascorbate and glutathione.glutathione
+	1.65978	0.0218889	-1.01604	I1K3H5	Lactamase_B domain-containing protein	11	2	34.8	6.57	at1g30300	35.1	not assigned.no ontology
+	1.59878	0.0251893	-1.01814	I1KJZ0	E3 ubiquitin-protein ligase (EC 2.3.2.27)	2	2	229.8	6.25	at5g02310	29.5.11	protein.degradation.ubiquitin
+	1.46731	0.0340948	-1.01998	I1LWZ5	PMR5N domain-containing protein	7	2	50.4	6.84	at5g15900	35.2	not assigned.unknown
+	1.51368	0.0306423	-1.02098	K7KRR7	X8 domain-containing protein	10	3	54.4	5.97	at5g56590	26.4.1	misc.beta 1,3 glucan hydrolases.glucan endo-1,3-beta-glucosidase
+	4.0726	8.46054e-05	-1.02351	I1KEH1	Phytocyanin domain-containing protein	20	3	23.2	7.87	at3g20570	26.19	misc.plastocyanin-like
+	1.804	0.0157035	-1.02374	I1M9W9	Uncharacterized protein	4	2	107	7.27	at5g24810	35.1.1	not assigned.no ontology.ABC1 family protein
+	2.62804	0.00235485	-1.02583	I1N6I1	Hexosyltransferase (EC 2.4.1.-)	8	3	63.1	8.48	at3g02350	26.2	misc.UDP glucosyl and glucoronyl transferases
+	2.21396	0.00610998	-1.03144	C6T1T3	Uncharacterized protein	35	4	22.4	6.07	at3g48940	27.3.99	RNA.regulation of transcription.unclassified
+	1.99571	0.0100993	-1.03203	I1KYC6	Peptidase A1 domain-containing protein	14	4	51.9	7.84	at5g10770	27.3.99	RNA.regulation of transcription.unclassified
	1.32962	0.0468142	-1.03268	I1J4W3	Uncharacterized protein	10	4	73.1	7.23	at4g37870	6.4	gluconeogenese/ glyoxylate cycle.PEPCK
+	2.77441	0.00168109	-1.03441	I1M1I9	Uncharacterized protein	5	3	82	9.28	at1g30360	20.2.3	stress.abiotic.drought/salt
+	1.40302	0.0395348	-1.03915	I1LVI0	Protein kinase domain-containing protein	10	5	100.6	7.25	at1g22870	29.4	protein.postranslational modification
+	1.88224	0.0131148	-1.04201	I1ND63	LRRNT_2 domain-containing protein	21	7	50.3	8.05	at1g49750	35.1	not assigned.no ontology
+	2.87499	0.00133354	-1.04283	I1M9S1	Plasma membrane ATPase (EC 7.1.2.1)	32	22	104.6	7.21	at2g24520	34.1	transport.p- and v-ATPases
+	1.52144	0.0300998	-1.04828	I1MA39	Lipase_GDSL domain-containing protein	13	3	46.8	8.19	at3g26430	26.28	misc.GDSL-motif lipase
+	1.94134	0.0114462	-1.04829	A0A0R0I2M6	Peroxidase (EC 1.11.1.7)	34	5	38.5	6.04	at2g38380	26.12	misc.peroxidases
+	1.65667	0.0220461	-1.05063	C6TI50	Peroxidase (EC 1.11.1.7)	31	5	38	8.43	at2g38380	26.12	misc.peroxidases
+	2.9977	0.00100532	-1.05572	I1LLG3	Peptidase A1 domain-containing protein	29	6	46.8	9.01	at5g07030	27.3.67	RNA.regulation of transcription.putative transcription regulator
+	2.3392	0.00457932	-1.05654	I1MHW2	Uncharacterized protein	4	3	94.2	6.64	at1g29400	27.4	RNA.RNA binding
+	2.57188	0.00267992	-1.05673	A0A0R4J2V8	Dirigent protein	28	3	23.9	6.28	at3g13650	20.1.7	stress.biotic.PR-proteins
+	2.01088	0.00975251	-1.05709	A0A0R0L0K1	Uncharacterized protein	10	4	62.4	9.07	at1g66150	30.2.9	signalling.receptor kinases.leucine rich repeat IX
+	2.1176	0.00762789	-1.05723	I1M9K9	Uncharacterized protein	25	8	39.8	7.74	at5g11420	35.2	not assigned.unknown
+	2.09246	0.00808238	-1.05788	A0A0R0HFK7	Exostosin domain-containing protein	5	2	59.4	8.84	at5g16890	10.3	cell wall.hemicellulose synthesis
+	2.0662	0.00858616	-1.06211	I1MEL2	Uncharacterized protein	31	2	13.3	8.81	at1g28330	33.99	development.unspecified
+	2.54629	0.00284257	-1.06427	I1LJG0	Glycosyltransferase (EC 2.4.2.-)	22	6	49.4	8.78	at1g19360	35.2	not assigned.unknown
+	2.18375	0.00655007	-1.06428	C6SX09	Uncharacterized protein (Fragment)	34	7	29.2	6.35	at1g64200	34.1.1	transport.p- and v-ATPases.H+-transporting two-sector ATPase
+	1.43624	0.0366239	-1.0693	A0A0R0JQ91	Chlorophyll a-b binding protein, chloroplastic	33	4	27.9	7.44	at3g47470	1.1.2.1	PS.lightreaction.photosystem I.LHC-I
+	2.43553	0.00366831	-1.07282	I1NIY9	Mitochondrial Rho GTPase (EC 3.6.5.-)	43	16	71.9	5.54	at5g27540	30.5	signalling.G-proteins
+	1.88667	0.0129818	-1.07491	I1LQ25	Glucose-1-phosphate adenylyltransferase (EC 2.7.7.27) (ADP-glucose pyrophosphorylase)	13	4	58.5	8.29	at4g39210	2.1.2.1	major CHO metabolism.synthesis.starch.AGPase
+	2.84419	0.00143156	-1.08074	C6TJF9	Uncharacterized protein	55	8	24	6.58	at1g09630	30.5	signalling.G-proteins
+	2.53106	0.002944	-1.08114	I1MXA0	Uncharacterized protein	4	2	63.2	5.36	at5g11920	3.5	minor CHO metabolism.others
+	2.36499	0.00431532	-1.08257	C6SVL0	Uncharacterized protein	47	6	21.8	5.33	at1g73260	20.1.7.6.1	stress.biotic.PR-proteins.proteinase inhibitors.trypsin inhibitor
+	2.34892	0.00447792	-1.09689	K7MPZ4	dUTPase domain-containing protein	43	3	15.7	5.53	at3g46940	23.5.5	nucleotide metabolism.deoxynucleotide metabolism.dUTP diphosphatase
+	1.62875	0.02351	-1.10723	C6T9R8	Glyceraldehyde-3-phosphate dehydrogenase (EC 1.2.1.-)	37	10	48.1	7.43	at1g42970	1.3.4	PS.calvin cyle.GAP
+	2.93604	0.00115866	-1.10726	I1LMX6	Uroporphyrinogen decarboxylase (EC 4.1.1.37)	25	5	42.7	7.49	at2g40490	19.7	tetrapyrrole synthesis.uroporphyrinogen decarboxylase
+	1.70887	0.0195493	-1.10916	I1MY52	PKS_ER domain-containing protein	22	4	39.4	7.33	at4g39330	16.2.1.10	secondary metabolism.phenylpropanoids.lignin biosynthesis.CAD
+	4.02568	9.42587e-05	-1.1108	I1K7G0	Methyltransferase (EC 2.1.1.-)	34	10	40.4	6.74	at1g20330	17.3.1.2.2	hormone metabolism.brassinosteroid.synthesis-degradation.sterols.SMT2
	1.33009	0.0467641	-1.11081	I1MY38	HATPase_c domain-containing protein	38	28	93.2	4.98	at4g24190	20.2.1	stress.abiotic.heat
+	2.26042	0.0054901	-1.11207	I1NBM7	Uncharacterized protein	32	10	55.5	6.73	at1g11910	29.5.4	protein.degradation.aspartate protease
+	1.69381	0.0202388	-1.11515	A0A0R0FQV9	Xyloglucan endotransglucosylase/hydrolase (EC 2.4.1.207)	28	7	33.7	6.93	at5g13870	10.7	cell wall.modification
+	2.0999	0.00794506	-1.12017	I1LLM7	Asparagine synthetase [glutamine-hydrolyzing] (EC 6.3.5.4)	51	19	65.2	6.64	at3g47340	13.1.3.1.1	amino acid metabolism.synthesis.aspartate family.asparagine.asparagine synthetase
+	4.72316	1.89167e-05	-1.12499	K7LQ40	Pyr_redox_2 domain-containing protein	9	2	39.4	8.54	at3g44190	35.1	not assigned.no ontology
+	2.18895	0.00647214	-1.13177	D2D5G3	Methyltransferase (EC 2.1.1.-)	31	9	40.4	6.95	at1g20330	17.3.1.2.2	hormone metabolism.brassinosteroid.synthesis-degradation.sterols.SMT2
+	2.09601	0.00801654	-1.14178	A0A0R0GAQ0	Peptidase A1 domain-containing protein	5	2	50.1	8.75	at5g10770	27.3.99	RNA.regulation of transcription.unclassified
+	2.73554	0.0018385	-1.14965	I1NCT8	Potassium transporter	4	2	88.4	8.56	at4g13420	34.15	transport.potassium
+	1.73799	0.0182813	-1.15361	I1K0I0	Uncharacterized protein	10	5	75.6	8.37	at1g12360	31.4	cell.vesicle transport
+	1.50903	0.030972	-1.15982	I1L1D9	Uncharacterized protein	35	2	10.5	9.35	at4g30010	35.2	not assigned.unknown
+	2.12895	0.00743105	-1.16727	C6TA28	Nucleoside diphosphate kinase (EC 2.7.4.6)	15	2	25.2	9.03	at5g63310	23.4.10	nucleotide metabolism.phosphotransfer and pyrophosphatases.nucleoside diphosphate kinase
+	3.51474	0.000305676	-1.16731	C6SVC7	Uncharacterized protein	32	3	20.2	7.87	at4g27435	35.2	not assigned.unknown
+	1.37577	0.0420948	-1.17136	C6F122	Beta-galactosidase (EC 3.2.1.23)	14	5	79.8	8.03	at4g26140	26.3.2	misc.gluco-, galacto- and mannosidases.beta-galactosidase
+	1.72767	0.0187211	-1.17378	I1LBD2	Uncharacterized protein	14	2	22	5.21	at3g06035	35.2	not assigned.unknown
+	1.76974	0.0169927	-1.17703	A0A0R0GA40	Uncharacterized protein	13	3	50.8	6.01	at3g16850	10.6.3	cell wall.degradation.pectate lyases and polygalacturonases
+	1.60792	0.0246647	-1.17825	A0A0R0H2Z4	Uncharacterized protein	22	7	59.8	8.94	at3g14690	26.1	misc.cytochrome P450
+	1.4825	0.0329231	-1.18169	I1J7R6	FACT complex subunit SSRP1	6	3	71.8	5.78	at3g28730	27.3.62	RNA.regulation of transcription.Nucleosome/chromatin assembly factor group
+	2.19797	0.00633911	-1.18331	K7N361	Lipase	11	3	49.2	7.23	at2g15230	11.9.2.1	lipid metabolism.lipid degradation.lipases.triacylglycerol lipase
+	4.06483	8.61336e-05	-1.18997	I1K108	Uncharacterized protein	52	18	69.1	7.93	at4g18030	20.2.3	stress.abiotic.drought/salt
+	2.3496	0.0044709	-1.19219	I1KET7	PMR5N domain-containing protein	8	2	40.6	8.94	at2g42570	35.2	not assigned.unknown
+	2.82362	0.001501	-1.19583	C6SYP7	Dirigent protein	18	2	24.2	8.37	at1g65870	20.1.7	stress.biotic.PR-proteins
+	3.32717	0.00047079	-1.21246	I1MBC5	Asparagine synthetase [glutamine-hydrolyzing] (EC 6.3.5.4)	57	21	65.5	6.47	at3g47340	13.1.3.1.1	amino acid metabolism.synthesis.aspartate family.asparagine.asparagine synthetase
+	2.33964	0.00457466	-1.21818	I1NAB2	Uncharacterized protein	9	8	146.2	7.62	at2g36910	34.16	transport.ABC transporters and multidrug resistance systems
+	1.62397	0.0237698	-1.21916	I1L6Z0	Cellulase domain-containing protein	7	3	55.5	5.64	at5g01930	10.6.2	cell wall.degradation.mannan-xylose-arabinose-fucose
+	2.11005	0.00776153	-1.24223	I1K6B1	NAB domain-containing protein	5	4	139.4	4.94	at5g41790	30.11.1	signalling.light.COP9 signalosome
+	2.36303	0.00433479	-1.25068	I1J5A5	Aldedh domain-containing protein	50	16	58.4	6.84	at1g23800	5.1	fermentation.aldehyde dehydrogenase
+	1.60903	0.0246017	-1.25933	C6SZQ8	Phytocyanin domain-containing protein	24	2	17.3	6.76	at1g72230	26.19	misc.plastocyanin-like
+	1.55326	0.027973	-1.27299	I1LRP4	Uncharacterized protein	27	8	60.2	7.28	at1g76160	35.1	not assigned.no ontology
+	2.58223	0.00261681	-1.27707	I1MLA1	Uncharacterized protein	6	2	55	8.94	at1g08660	29.7	protein.glycosylation
+	2.65052	0.00223605	-1.27862	I1MTI7	Aldedh domain-containing protein	27	8	49.7	8.13	at3g48000	5.1	fermentation.aldehyde dehydrogenase
+	1.64119	0.0228462	-1.28029	I1KHL4	Chlorophyll a-b binding protein, chloroplastic	22	3	30.8	6.39	at3g61470	1.1.2.1	PS.lightreaction.photosystem I.LHC-I
+	2.59231	0.00255678	-1.28079	I1L2Z2	SPX domain-containing protein	9	4	78.1	6.61	at4g22990	35.1	not assigned.no ontology
+	4.03365	9.25435e-05	-1.28181	I1MCZ5	LEA_2 domain-containing protein	12	2	27.9	10.27	at1g17620	35.2	not assigned.unknown
+	1.7606	0.0173542	-1.2873	I1MHW9	Uncharacterized protein	12	4	59.1	6.11	at5g34940	35.1	not assigned.no ontology
+	1.5341	0.0292351	-1.28737	I1J5R4	Uncharacterized protein	15	2	25.9	5.07	at1g14220	27.1.19	RNA.processing.ribonucleases
+	1.34204	0.0454946	-1.29455	I1KQC0	Uncharacterized protein	15	6	68.8	8.95	at1g24764	31.1	cell.organisation
+	2.40446	0.00394038	-1.31022	I1KRB5	FAD-binding PCMH-type domain-containing protein	33	12	58.8	8.7	at1g30760	26.8	misc.nitrilases, *nitrile lyases, berberine bridge enzymes, reticuline oxidases, troponine reductases
+	2.44287	0.00360685	-1.32886	I1K510	Uncharacterized protein	18	8	93.7	5.17	at5g64030	20.2.3	stress.abiotic.drought/salt
+	2.20761	0.00620002	-1.33296	I1KMK2	Uncharacterized protein	4	3	162.5	8.13	at3g53480	34.16	transport.ABC transporters and multidrug resistance systems
+	2.07389	0.00843547	-1.33442	A8HTK0	Thioredoxin	51	4	13.3	5.53	at3g51030	21.1	redox.thioredoxin
+	1.97992	0.0104733	-1.34126	K7LQS4	Uncharacterized protein	5	2	72.1	6.54	at2g29630	18.2	Co-factor and vitamine metabolism.thiamine
+	1.42372	0.0376943	-1.34209	I1JWM6	COBRA-like protein	10	2	50.6	8.68	at5g60920	10.2.2	cell wall.cellulose synthesis.COBRA
+	2.20239	0.00627488	-1.3427	I1MS92	Uncharacterized protein	5	2	55	8.28	at1g19170	10.6.3	cell wall.degradation.pectate lyases and polygalacturonases
+	2.85874	0.0013844	-1.34467	A8C8H5	Glutamate decarboxylase (EC 4.1.1.15)	59	19	57.2	5.82	at2g02010	13.1.1.1.1	amino acid metabolism.synthesis.central amino acid metabolism.GABA.Glutamate decarboxylase
+	3.76956	0.000169998	-1.3474	I1LZU4	CYTH domain-containing protein	13	2	22.3	5.39	at2g11890	35.2	not assigned.unknown
+	3.08446	0.000823262	-1.35184	I1KBS7	Uncharacterized protein	39	12	62.5	4.86	at1g72160	34.99	transport.misc
+	1.87342	0.0133838	-1.35581	I1MQL3	Uncharacterized protein	18	14	116.4	9.31	at1g48410	33.99	development.unspecified
+	2.35936	0.00437158	-1.35852	A0A0R0GN50	Phosphotransferase (EC 2.7.1.-)	29	9	53.7	5.24	at1g47840	2.2.1.4	major CHO metabolism.degradation.sucrose.hexokinase
+	2.11692	0.00763975	-1.35856	I1MZM7	Uncharacterized protein	27	4	26.7	6.42	at5g58250	35.2	not assigned.unknown
+	1.99151	0.0101974	-1.36319	C6THI3	PKS_ER domain-containing protein	58	12	39.1	6.84	at4g37980	16.2.1.10	secondary metabolism.phenylpropanoids.lignin biosynthesis.CAD
+	2.81092	0.00154555	-1.36347	I1MER4	PMR5N domain-containing protein	28	6	42.3	8.75	at1g29050	35.2	not assigned.unknown
+	1.32652	0.0471499	-1.36771	K7KN46	Uncharacterized protein	2	2	239.3	5.77	at4g17330	35.1.2	not assigned.no ontology.agenet domain-containing protein
+	2.81959	0.001515	-1.37075	K7LP97	RRM domain-containing protein	42	5	16.9	8.12	at2g21660	27.4	RNA.RNA binding
+	2.77517	0.00167816	-1.37695	K7LCZ8	Cellulose synthase (EC 2.4.1.12)	20	11	120.1	7.39	at5g05170	10.2.1	cell wall.cellulose synthesis.cellulose synthase
+	1.7639	0.0172227	-1.37998	C6T447	Uncharacterized protein	40	6	25.1	6.35	at5g65270	30.5	signalling.G-proteins
+	3.22058	0.000601749	-1.38755	I1N4W1	PMR5N domain-containing protein	24	6	51.3	8.51	at5g15900	35.2	not assigned.unknown
+	4.24723	5.65935e-05	-1.39222	I1KSC1	Uncharacterized protein	11	5	66.5	8.19	at4g08810	35.2	not assigned.unknown
+	2.70336	0.00197986	-1.39235	A0A0R0EHS8	PMR5N domain-containing protein	33	3	20.5	8.31	at5g15900	35.2	not assigned.unknown
+	1.4329	0.0369061	-1.39284	C6TI75	NTP_transferase domain-containing protein	22	5	39.6	7.49	at2g39770	10.1.1.1	cell wall.precursor synthesis.NDP sugar pyrophosphorylase.GDP mannose
+	1.85036	0.0141135	-1.40147	I1KNV8	Uncharacterized protein	14	7	95.1	5.14	at5g64030	20.2.3	stress.abiotic.drought/salt
+	2.14219	0.00720787	-1.40319	I1K702	PLCXc domain-containing protein	26	5	36.2	8.02	at4g38690	11.9.3	lipid metabolism.lipid degradation.lysophospholipases
+	1.91975	0.0120296	-1.4111	I1KRH0	AAA domain-containing protein	9	2	45.4	6.29	at2g34560	31.1	cell.organisation
+	1.7287	0.0186766	-1.431	A0A0R0HUK1	Uncharacterized protein	18	3	30.7	7.42	at5g60660	34.19.1	transport.Major Intrinsic Proteins.PIP
+	1.52357	0.0299524	-1.43469	I1NII6	IPPc domain-containing protein	2	2	127.2	6.47	at1g65580	28.1	DNA.synthesis/chromatin structure
+	1.95161	0.0111786	-1.4531	K7MP10	Uncharacterized protein	10	6	118.6	5.02	at1g19835	35.2	not assigned.unknown
+	4.03323	9.2634e-05	-1.46055	A0A0R0FVX1	Uncharacterized protein	32	12	58.6	7.37	at5g07990	16.8.3.3	secondary metabolism.flavonoids.dihydroflavonols.flavonoid 3''-monooxygenase
+	2.20883	0.00618261	-1.46958	I1L0D9	Peroxidase (EC 1.11.1.7)	36	6	38	7.3	at2g38380	26.12	misc.peroxidases
+	2.54158	0.00287357	-1.47228	K7KZ57	Uncharacterized protein	5	2	51.6	6.42	at5g48930	16.2.1.4	secondary metabolism.phenylpropanoids.lignin biosynthesis.HCT
+	4.09855	7.96983e-05	-1.47242	C6T736	V-SNARE domain-containing protein	42	6	24.7	9.5	at3g29100	31.4	cell.vesicle transport
+	2.24012	0.00575279	-1.47254	A0A0R0J452	Uncharacterized protein	19	3	25.2	6.15	at3g16240	34.19.2	transport.Major Intrinsic Proteins.TIP
+	1.71565	0.0192463	-1.48595	C6TMX0	Xyloglucan endotransglucosylase/hydrolase (EC 2.4.1.207)	31	8	34.4	8.95	at5g13870	10.7	cell wall.modification
+	2.74613	0.00179421	-1.50113	I1KZ04	Cytochrome b561 and DOMON domain-containing protein	13	3	43.2	9.38	at3g25290	17.2.3	hormone metabolism.auxin.induced-regulated-responsive-activated
+	1.3176	0.0481283	-1.50599	I1MLV5	Fe2OG dioxygenase domain-containing protein	32	7	35.8	5.69	at1g52790	26.14	misc.oxygenases
+	3.26569	0.00054239	-1.5145	K7LJA2	Uncharacterized protein	8	2	51.2	6.02	at3g62110	10.6.3	cell wall.degradation.pectate lyases and polygalacturonases
+	1.46524	0.0342578	-1.51549	I1LHR1	RRM domain-containing protein	8	2	57.6	8.41	at3g50670	27.1.1	RNA.processing.splicing
+	1.69352	0.0202525	-1.52847	C6T3E5	MPN domain-containing protein	39	4	22.9	5.78	at5g55940	35.2	not assigned.unknown
+	3.57259	0.000267553	-1.53798	I1M3B6	Uncharacterized protein	3	2	131.6	7.34	at4g27430	31.1	cell.organisation
+	2.20805	0.0061937	-1.55316	I1M3S8	Uncharacterized protein	4	3	85.7	5.12	at4g03560	34.21	transport.calcium
+	3.64718	0.000225332	-1.55701	I1KD34	COBRA-like protein	14	3	50.7	8.6	at5g60920	10.2.2	cell wall.cellulose synthesis.COBRA
+	3.00145	0.000996668	-1.55708	I1L3E3	Uncharacterized protein	6	2	39.4	9.48	at5g52060	20.2	stress.abiotic
+	1.31138	0.0488229	-1.56475	Q8LGT8	Phosphoglycerate mutase-like protein	20	4	31.8	6.34	at5g64460	35.2	not assigned.unknown
+	3.94484	0.000113543	-1.59383	A0A0R0IYY7	Uncharacterized protein	51	19	59	8.65	at5g07990	16.8.3.3	secondary metabolism.flavonoids.dihydroflavonols.flavonoid 3''-monooxygenase
+	2.00127	0.00997072	-1.60857	K7K7V7	Pterin-binding domain-containing protein	15	5	57.4	7.42	at4g30000	25.3	C1-metabolism.dihydropteridine diphosphokinase
+	2.47518	0.00334824	-1.60924	C6TD35	PABS domain-containing protein	9	2	37	5.4	at1g23820	22.1.6	polyamine metabolism.synthesis.spermidine synthase
+	1.75182	0.0177084	-1.61442	A0A0R0G7V6	Uncharacterized protein	5	2	62.8	6.99	at4g21760	26.3	misc.gluco-, galacto- and mannosidases
+	2.82767	0.00148706	-1.62406	A0A0R4J508	Expansin	11	2	27.9	9.26	at2g39700	10.7	cell wall.modification
+	2.62271	0.00238391	-1.63349	I1JIW7	Uncharacterized protein	30	7	24.9	9.42	at5g11150	31.4	cell.vesicle transport
+	1.89778	0.0126537	-1.64539	I1LVS4	Uncharacterized protein	27	9	61.7	5.2	at3g21240	16.2.1.3	secondary metabolism.phenylpropanoids.lignin biosynthesis.4CL
+	3.20897	0.000618061	-1.65494	C6TDZ7	Uncharacterized protein	14	3	40.2	6.19	at4g39090	29.5.3	protein.degradation.cysteine protease
+	3.93434	0.000116322	-1.65881	I1JT65	Uncharacterized protein	18	4	40.1	6.37	at4g39090	29.5.3	protein.degradation.cysteine protease
+	3.88913	0.000129084	-1.67988	C6THF2	Uncharacterized protein	14	2	31.5	5.36	at1g32400	33.99	development.unspecified
+	2.92418	0.00119075	-1.68075	A0A0R0IA82	Peptidase A1 domain-containing protein	14	3	52.8	5.35	at3g18490	27.3.99	RNA.regulation of transcription.unclassified
+	1.30601	0.0494294	-1.68264	A0A0R0KTP5	Uncharacterized protein	30	4	30.4	8.15	at2g37170	34.19.1	transport.Major Intrinsic Proteins.PIP
+	3.60122	0.000250485	-1.68466	A0A024FRX1	Glycosyltransferase (EC 2.4.1.-)	10	3	52.2	6.14	at3g16520	26.2	misc.UDP glucosyl and glucoronyl transferases
+	2.56372	0.00273071	-1.69494	I1MMC2	t-SNARE coiled-coil homology domain-containing protein	18	3	30	6.32	at5g46860	31.4	cell.vesicle transport
+	3.02535	0.000943305	-1.71122	I1KTE1	Cellulose synthase (EC 2.4.1.12)	12	8	123.9	6.93	at5g64740	10.2.1	cell wall.cellulose synthesis.cellulose synthase
+	2.09843	0.007972	-1.71397	I1MNI2	Uncharacterized protein	16	3	39.6	6.8	at4g36810	16.1.1.10	secondary metabolism.isoprenoids.non-mevalonate pathway.geranylgeranyl pyrophosphate synthase
+	4.88831	1.29326e-05	-1.71622	A0A0R0KYU7	Xyloglucan endotransglucosylase/hydrolase (EC 2.4.1.207)	29	8	36	8.25	at5g13870	10.7	cell wall.modification
+	2.7818	0.00165272	-1.7217	A0A0R0INP8	Peroxidase (EC 1.11.1.7)	29	7	34.5	8.9	at5g64120	26.12	misc.peroxidases
+	2.60953	0.00245734	-1.72671	I1LCV9	Carboxypeptidase (EC 3.4.16.-)	16	6	56	5.38	at3g10410	29.5.5	protein.degradation.serine protease
+	2.38471	0.00412371	-1.74476	C6SVM4	Uncharacterized protein	35	4	22.3	5.82	at3g48940	27.3.99	RNA.regulation of transcription.unclassified
+	1.35654	0.0440008	-1.75667	I1LA99	Uncharacterized protein	10	4	86.2	5.92	at2g41770	35.2	not assigned.unknown
+	2.85983	0.00138093	-1.76319	I1L7W1	Uncharacterized protein	4	4	167.6	8.15	at2g47800	34.16	transport.ABC transporters and multidrug resistance systems
+	3.08946	0.000813845	-1.76407	C6ZRR4	NAK-type protein kinase	8	5	102.2	6.34	at1g66150	30.2.9	signalling.receptor kinases.leucine rich repeat IX
+	3.4908	0.000322995	-1.7689	I1LL85	Uncharacterized protein	5	2	60.7	8.48	at3g08550	17.1.2	hormone metabolism.abscisic acid.signal transduction
+	2.13113	0.00739379	-1.77489	I1K8B5	Uncharacterized protein	11	2	53.5	6.13	at4g32940	29.3.4.3	protein.targeting.secretory pathway.vacuole
+	3.40369	0.000394738	-1.78027	Q8S564	4-coumarate:coenzyme A ligase (EC 6.2.1.12)	26	9	59.3	5.91	at3g21240	16.2.1.3	secondary metabolism.phenylpropanoids.lignin biosynthesis.4CL
+	4.02794	9.37688e-05	-1.7845	I1JUE0	Cellulose synthase (EC 2.4.1.12)	28	19	122	6.76	at4g32410	10.2.1	cell wall.cellulose synthesis.cellulose synthase
+	1.82269	0.015042	-1.7961	I1NAW5	Uncharacterized protein	15	3	50.5	6.71	at2g35860	35.1	not assigned.no ontology
+	3.70222	0.000198511	-1.79807	I1L0Z7	Uncharacterized protein	6	6	168.3	7.47	at2g47800	34.16	transport.ABC transporters and multidrug resistance systems
+	1.89885	0.0126227	-1.80008	C6SXG7	FMN_red domain-containing protein	63	7	21.5	8.82	at3g27890	35.1	not assigned.no ontology
+	2.92099	0.00119953	-1.81304	I1MWI1	zinc_ribbon_10 domain-containing protein	9	2	44.8	8.84	at4g31080	35.2	not assigned.unknown
+	2.62967	0.00234601	-1.8142	I1MXX3	Uncharacterized protein	21	2	16.5	9.31	at1g19530	35.2	not assigned.unknown
+	3.01778	0.00095989	-1.81499	C6TLB6	Uncharacterized protein	46	11	46.3	6.3	at5g22060	20.2.1	stress.abiotic.heat
+	2.77601	0.00167489	-1.8279	C6TL20	Lipase_GDSL domain-containing protein	31	7	40.2	6.1	at5g33370	26.28	misc.GDSL-motif lipase
+	3.07617	0.000839132	-1.8295	I1LI35	Vacuolar protein sorting-associated protein 35	18	8	89.7	5.44	at2g17790	29.3.4.3	protein.targeting.secretory pathway.vacuole
+	1.37373	0.0422934	-1.8427	C6SYN8	Uncharacterized protein	24	2	15.5	7.96	at1g19530	35.2	not assigned.unknown
+	4.14129	7.2229e-05	-1.85654	I1K3A6	Uncharacterized protein	10	4	64.3	6.57	at2g02040	34.3	transport.amino acids
+	1.79489	0.0160363	-1.85798	I1NEV9	Uncharacterized protein	15	2	24.2	7.83	at1g56700	29.5	protein.degradation
+	1.60464	0.0248519	-1.87585	I1L6R1	Uncharacterized protein	13	6	66.9	8.27	at4g00740	20.2.3	stress.abiotic.drought/salt
+	2.98122	0.00104419	-1.89447	A0A0R0KRN8	Glycosyltransferase (EC 2.4.1.-)	7	2	50.9	7.5	at1g24100	16.5.1.1.4.3	secondary metabolism.sulfur-containing.glucosinolates.synthesis.shared.UDP-glycosyltransferase
+	1.8155	0.0152931	-1.91081	I1JCY0	Chlorophyll a-b binding protein, chloroplastic	18	3	26.7	6.68	at3g54890	1.1.2.1	PS.lightreaction.photosystem I.LHC-I
+	2.58729	0.0025865	-1.92706	C6SZJ5	FAS1 domain-containing protein	14	2	26.3	9.57	at5g03170	10.5.1	cell wall.cell wall proteins.AGPs
+	5.5952	2.53981e-06	-1.92779	A0A0R0HZ32	Uncharacterized protein	13	2	20	5.3	at1g02816	35.2	not assigned.unknown
+	2.17364	0.00670437	-1.93182	I1MVV4	Uncharacterized protein	3	2	125.9	5.22	at2g23360	35.1	not assigned.no ontology
+	1.78148	0.0165393	-1.93571	I1JVD1	Uncharacterized protein	6	3	78.7	6.73	at1g78240	20.2.3	stress.abiotic.drought/salt
+	2.24948	0.00563009	-1.93584	I1ND18	Uncharacterized protein	9	3	73.8	6.83	at1g49430	11.1.9	lipid metabolism.FA synthesis and FA elongation.long chain fatty acid CoA ligase
+	1.44199	0.0361417	-1.93609	A0A0R4J551	Phytocyanin domain-containing protein	19	2	20.9	7.36	at1g72230	26.19	misc.plastocyanin-like
+	1.89001	0.0128821	-1.95991	K7KP88	Uncharacterized protein	3	5	255	6.07	at3g50370	35.2	not assigned.unknown
+	2.78144	0.0016541	-1.96349	Q2LAL4	Cytochrome P450 monooxygenase CYP83E8	38	13	57.4	7.96	at4g31500	16.5.1.1.4.1	secondary metabolism.sulfur-containing.glucosinolates.synthesis.shared.CYP83B1 phenylacetaldoxime monooxygenase
+	2.95077	0.00112003	-1.97067	I1KH95	Uncharacterized protein	5	2	93	8.76	at3g13990	35.1.41	not assigned.no ontology.hydroxyproline rich proteins
+	3.41103	0.000388124	-1.97718	I1K8W4	Cellulose synthase (EC 2.4.1.12)	28	18	122	6.76	at4g32410	10.2.1	cell wall.cellulose synthesis.cellulose synthase
+	2.9686	0.00107497	-1.98526	I1LDY8	Uncharacterized protein	23	5	52.1	7.8	at3g22890	14.1	S-assimilation.APS
+	2.31549	0.00483628	-2.00025	I1M192	Uncharacterized protein	26	5	33.3	5.81	at5g18900	26.7	misc.oxidases - copper, flavone etc.
+	2.11045	0.00775446	-2.0075	C6TEQ7	Lipase_GDSL domain-containing protein	15	2	37.8	7.85	at3g16370	26.28	misc.GDSL-motif lipase
+	2.03828	0.00915637	-2.01737	A0A0R0FGJ1	Protein kinase domain-containing protein	4	2	95.1	6.23	at3g51550	30.2.16	signalling.receptor kinases.Catharanthus roseus-like RLK1
+	1.58864	0.0257846	-2.0339	K7MNL1	AB hydrolase-1 domain-containing protein	10	2	29.9	6.21	at3g03990	35.1	not assigned.no ontology
+	1.9688	0.0107448	-2.03622	Q2LAL0	Cytochrome P450 monooxygenase CYP81E11	22	6	57.9	8.91	at4g37340	26.1	misc.cytochrome P450
+	4.22588	5.94458e-05	-2.04593	C6T8K0	LEA_2 domain-containing protein	19	4	34.2	9.94	at1g45688	35.2	not assigned.unknown
+	2.71974	0.00190661	-2.05502	I1LH27	Tubulin alpha chain	56	20	49.7	5.06	at1g50010	31.1	cell.organisation
+	3.45514	0.00035064	-2.07936	I1KWS8	Glyco_hydro_19_cat domain-containing protein	10	2	36	6.27	at1g05850	20.1	stress.biotic
+	3.60458	0.000248554	-2.09334	K7M4N7	Uncharacterized protein	4	2	65.1	8.12	at1g06560	35.1	not assigned.no ontology
+	3.3561	0.000440457	-2.10123	A0A0R0HPC7	Pectate lyase (EC 4.2.2.2)	5	2	42.1	8.09	at3g55140	10.6.3	cell wall.degradation.pectate lyases and polygalacturonases
+	3.10391	0.000787203	-2.11084	I1JRU5	Lipase_GDSL domain-containing protein	25	6	40.4	5.74	at5g33370	26.28	misc.GDSL-motif lipase
+	3.31528	0.000483856	-2.13338	C6TJK9	Peptidyl-prolyl cis-trans isomerase (PPIase) (EC 5.2.1.8)	10	2	28.3	8.6	at3g62030	31.3.1	cell.cycle.peptidylprolyl isomerase
+	1.78002	0.0165953	-2.14607	I1K3E9	CULLIN_2 domain-containing protein	10	6	88.5	7.65	at5g46210	29.5.11.4.3.3	protein.degradation.ubiquitin.E3.SCF.cullin
+	5.48399	3.28101e-06	-2.21399	I1N843	Glyceraldehyde-3-phosphate dehydrogenase (EC 1.2.1.-)	47	14	43.2	8.25	at1g12900	1.3.4	PS.calvin cyle.GAP
+	1.71239	0.0193913	-2.21673	I1LB67	t-SNARE coiled-coil homology domain-containing protein	10	2	36.3	8.81	at3g05710	31.4	cell.vesicle transport
+	1.55652	0.0277638	-2.22679	I1NHU7	Uncharacterized protein	10	2	39	6.29	at2g38680	23.2	nucleotide metabolism.degradation
+	1.62508	0.0237096	-2.24392	A0A0R0EP22	Uncharacterized protein	14	6	76.5	7.87	at3g01680	35.2	not assigned.unknown
+	2.12131	0.00756287	-2.24513	A0A0R0L0I9	HTH myb-type domain-containing protein	2	2	46.7	6.84	at3g04030	27.3.20	RNA.regulation of transcription.G2-like transcription factor family, GARP
+	2.84303	0.00143537	-2.24536	I1MI08	Transmembrane 9 superfamily member	21	10	74.9	5.88	at5g35160	35.2	not assigned.unknown
+	1.36952	0.042705	-2.25743	I1KNP5	Endoglucanase (EC 3.2.1.4)	9	4	68.7	8.72	at5g49720	10.2	cell wall.cellulose synthesis
+	3.09258	0.000808019	-2.26222	K7L6B3	Uncharacterized protein	13	2	31.1	6.93	at1g77700	20.1	stress.biotic
+	1.7087	0.0195567	-2.32374	K7LYU8	Uncharacterized protein	7	2	66.9	7.18	at5g56900	27.3.99	RNA.regulation of transcription.unclassified
+	1.41934	0.0380765	-2.32971	I1MVM2	Uncharacterized protein	5	2	69.8	6.38	at2g14820	30.11	signalling.light
+	2.27208	0.0053446	-2.36176	C6SZD1	UBIQUITIN_CONJUGAT_2 domain-containing protein	11	2	18.1	5.39	at1g23260	29.5.11.3	protein.degradation.ubiquitin.E2
+	2.02327	0.00947834	-2.38376	I1MZV7	Uncharacterized protein	5	2	49.6	8.68	at5g58470	27.3.99	RNA.regulation of transcription.unclassified
+	2.32916	0.00468639	-2.40658	I1MY41	Uncharacterized protein	13	5	61.3	6.65	at1g20080	35.1.19	not assigned.no ontology.C2 domain-containing protein
+	1.66315	0.0217196	-2.45122	I1L2J3	Uncharacterized protein	16	5	66.7	7.18	at3g58580	28.1	DNA.synthesis/chromatin structure
+	3.23357	0.00058403	-2.45618	K7MNZ5	Uncharacterized protein	15	3	40.4	6.7	at4g39090	29.5.3	protein.degradation.cysteine protease
+	1.37568	0.0421035	-2.47123	A0A0R0IPL8	NAD(P)-bd_dom domain-containing protein	35	7	38.5	6.54	at4g23920	10.1.2	cell wall.precursor synthesis.UGE
+	3.48075	0.00033056	-2.48921	I1MFX5	Endoglucanase (EC 3.2.1.4)	13	6	68.3	8.66	at5g49720	10.2	cell wall.cellulose synthesis
+	1.65661	0.022049	-2.49058	A0A0R0LJE6	Uncharacterized protein	4	2	83.1	7.11	at4g19040	20.1	stress.biotic
+	3.33117	0.000466479	-2.49112	A0A0R0I5R9	Uncharacterized protein	38	12	48	6.52	at1g64660	13.2.3.4.1	amino acid metabolism.degradation.aspartate family.methionine.methionine gamma-lyase
+	2.6766	0.00210572	-2.50872	Q9XFI6	Peroxidase (EC 1.11.1.7)	23	5	37.4	8.35	at4g21960	26.12	misc.peroxidases
+	1.46962	0.0339144	-2.5298	I1K2X6	FAD-binding PCMH-type domain-containing protein	30	11	59.5	9.03	at1g30760	26.8	misc.nitrilases, *nitrile lyases, berberine bridge enzymes, reticuline oxidases, troponine reductases
+	3.2823	0.000522036	-2.53725	K7M1F7	Lipase_GDSL domain-containing protein	8	2	40.5	7.91	at5g45950	26.28	misc.GDSL-motif lipase
+	2.21623	0.00607807	-2.61181	Q2MJR4	Myo-inositol-1-phosphate synthase	40	9	56.4	5.67	at5g10170	3.4.3	minor CHO metabolism.myo-inositol.InsP Synthases
+	1.77907	0.0166315	-2.62855	I1K6Q2	Uncharacterized protein	12	3	48.3	5.78	at5g41040	35.1	not assigned.no ontology
+	2.02046	0.0095398	-2.63317	A0A368UNA6	SSD domain-containing protein	14	10	138.7	5.22	at4g38350	35.1	not assigned.no ontology
+	1.38282	0.0414172	-2.64703	I1L1D2	Uncharacterized protein	6	3	88.5	7.15	at4g30020	29.5.1	protein.degradation.subtilases
+	1.9854	0.0103418	-2.66229	Q70MR6	Ornithine decarboxylase (EC 4.1.1.17)	9	2	46.4	5.49	at5g11880	13.1.3.5.5	amino acid metabolism.synthesis.aspartate family.lysine.diaminopimelate decarboxylase
+	1.81263	0.0153946	-2.67536	I1L158	Cellulose synthase (EC 2.4.1.12)	6	3	119.2	7.62	at5g44030	10.2.1	cell wall.cellulose synthesis.cellulose synthase
+	3.06307	0.000864835	-2.69703	I1JFT2	Glycosyltransferase (EC 2.4.1.-)	6	2	54.9	6.52	at1g22380	26.2	misc.UDP glucosyl and glucoronyl transferases
+	3.57191	0.000267969	-2.70716	A0A0R0HMK4	Uncharacterized protein	8	2	46.1	7.5	at4g36945	30.4.4	signalling.phosphinositides.phosphoinositide phospholipase C
+	1.58591	0.0259474	-2.71441	I1K0W4	Glutamate dehydrogenase	17	4	44.8	6.61	at5g07440	12.3.1	N-metabolism.N-degradation.glutamate dehydrogenase
+	3.96023	0.000109591	-2.73375	C6KHU4	Phenylalanine ammonia-lyase (EC 4.3.1.24)	41	16	78.1	6.19	at2g37040	16.2.1.1	secondary metabolism.phenylpropanoids.lignin biosynthesis.PAL
+	3.53108	0.000294388	-2.76774	K7MQS3	Peptidase A1 domain-containing protein	16	3	52	8.12	at5g10770	27.3.99	RNA.regulation of transcription.unclassified
+	3.0498	0.000891663	-2.79414	I1NGM0	Uncharacterized protein	5	2	75.1	9.01	at5g62190	27.1.2	RNA.processing.RNA helicase
+	3.02322	0.000947941	-2.80824	I1M8S3	Uncharacterized protein	36	15	82.1	7.39	at5g67360	29.5.1	protein.degradation.subtilases
+	1.96412	0.0108613	-2.84273	I1KG57	Uncharacterized protein	32	9	46.6	5.88	at3g21190	35.2	not assigned.unknown
+	1.71302	0.0193633	-2.87762	I1J785	Uncharacterized protein	25	8	52	7.78	at5g01210	16.2	secondary metabolism.phenylpropanoids
+	3.83658	0.000145686	-2.94826	I1N641	Uncharacterized protein	16	14	136.1	7.99	at3g28860	34.16	transport.ABC transporters and multidrug resistance systems
+	1.634	0.0232273	-2.94879	A0A0R4J3Q3	ABC transporter domain-containing protein	33	4	28.3	5.9	at1g67940	34.16	transport.ABC transporters and multidrug resistance systems
+	4.88257	1.31049e-05	-3.01196	I1KLU0	Mitogen-activated protein kinase (EC 2.7.11.24)	27	7	49.9	5.96	at2g43790	30.6	signalling.MAP kinases
+	1.66188	0.021783	-3.0368	I1L5J4	Uncharacterized protein	7	2	45.5	8.72	at1g70330	34.14	transport.unspecified cations
+	3.2888	0.000514286	-3.03746	C6TK45	Uncharacterized protein	8	2	43.8	8.46	at3g12120	11.2.4	lipid metabolism.FA desaturation.omega 6 desaturase
+	1.70235	0.019845	-3.0905	I1MAU6	Uncharacterized protein	8	4	78.8	6.55	at1g78240	20.2.3	stress.abiotic.drought/salt
+	1.36554	0.0430978	-3.10941	C6TH72	Fe2OG dioxygenase domain-containing protein	25	4	32.9	5.43	at4g33910	26.7	misc.oxidases - copper, flavone etc.
+	4.07427	8.42802e-05	-3.15854	C6TD22	Glyco_hydro_19_cat domain-containing protein	15	3	36.4	6.51	at1g05850	20.1	stress.biotic
+	2.33161	0.00466005	-3.21531	I1M1T9	ALOG domain-containing protein	20	3	20.2	9.72	at2g42610	35.2	not assigned.unknown
+	4.27867	5.26421e-05	-3.22616	C6T3V3	Glutathione peroxidase	18	3	19.1	9.61	at2g48150	21.2.2	redox.ascorbate and glutathione.glutathione
+	1.38358	0.041345	-3.22932	I1MC22	Lipase_GDSL domain-containing protein	10	2	39.9	7.85	at1g75900	33.99	development.unspecified
+	3.91542	0.000121502	-3.24279	I1L090	Endoglucanase (EC 3.2.1.4)	13	6	68.3	8.68	at5g49720	10.2	cell wall.cellulose synthesis
+	2.29847	0.00502951	-3.25966	A0A024FRL5	Glycosyltransferase (EC 2.4.1.-)	8	2	52	5.92	at3g16520	26.2	misc.UDP glucosyl and glucoronyl transferases
+	2.18688	0.00650307	-3.32975	A0A0R0JYG7	Protein kinase domain-containing protein	11	4	76.1	6.54	at5g14720	29.4	protein.postranslational modification
+	3.24131	0.000573713	-3.33206	I1ML02	Uncharacterized protein	8	4	69.9	6.62	at5g20950	10.6.1	cell wall.degradation.cellulases and beta -1,4-glucanases
+	1.49057	0.0323173	-3.34312	I1N0K6	WD_REPEATS_REGION domain-containing protein	43	6	32.6	6.16	at2g30050	29.3.4.4	protein.targeting.secretory pathway.plasma membrane
+	2.03399	0.00924715	-3.35012	I1JQB4	Uncharacterized protein	15	3	50.1	6.46	at2g35860	35.1	not assigned.no ontology
+	2.87329	0.00133878	-3.35456	I1KYC4	Peptidase A1 domain-containing protein	15	4	51.9	8.07	at5g10770	27.3.99	RNA.regulation of transcription.unclassified
+	2.2194	0.00603389	-3.35781	I1N6V6	PPR_long domain-containing protein	11	3	50.7	7.42	at4g35850	35.1.5	not assigned.no ontology.pentatricopeptide (PPR) repeat-containing protein
+	2.69018	0.00204087	-3.39392	I1N019	Uncharacterized protein	12	4	72.2	6.25	at2g29630	18.2	Co-factor and vitamine metabolism.thiamine
+	3.08343	0.000825224	-3.39408	I1JSP4	X8 domain-containing protein	10	2	48.3	5.16	at4g34480	35.1	not assigned.no ontology
+	1.41233	0.0386965	-3.40535	I1JBJ2	Uncharacterized protein	45	11	50.2	6.99	at5g50950	8.1.8	TCA / org. transformation.TCA.fumarase
+	4.22637	5.93791e-05	-3.49885	I1LRC1	Uncharacterized protein	21	9	62.5	9.11	at5g22740	10.2	cell wall.cellulose synthesis
+	1.71225	0.0193976	-3.50222	A0A0R4J4M3	FAS1 domain-containing protein	13	2	27.8	8.88	at5g03170	10.5.1	cell wall.cell wall proteins.AGPs
+	3.95907	0.000109882	-3.50374	A0A0R0KUR1	Phenylalanine ammonia-lyase (EC 4.3.1.24)	20	9	77.9	6.42	at2g37040	16.2.1.1	secondary metabolism.phenylpropanoids.lignin biosynthesis.PAL
+	2.73875	0.00182495	-3.50687	I1MXD5	Uncharacterized protein	6	2	53.2	5.58	at4g32940	29.3.4.3	protein.targeting.secretory pathway.vacuole
+	2.06773	0.00855594	-3.65046	I1JT08	Uncharacterized protein	10	3	81.4	6.67	at1g20160	29.5.1	protein.degradation.subtilases
+	1.65499	0.0221314	-3.65666	I1MVG7	Uncharacterized protein	23	7	76.9	4.35	at4g37820	35.1	not assigned.no ontology
+	3.33061	0.000467081	-3.70438	A0A0R4J2X1	Uncharacterized protein	8	2	44	8.34	at3g12120	11.2.4	lipid metabolism.FA desaturation.omega 6 desaturase
+	2.48309	0.00328781	-3.75557	A0A0R0HVZ4	Exocyst subunit Exo70 family protein	5	2	72	6.99	at5g03540	31.4	cell.vesicle transport
+	4.06499	8.61007e-05	-3.79192	I1MXJ1	Uncharacterized protein	36	15	82.2	7.09	at5g67360	29.5.1	protein.degradation.subtilases
+	2.98555	0.00103382	-3.79526	C6TKJ2	Xyloglucan endotransglucosylase/hydrolase (EC 2.4.1.207)	35	7	35.6	8.37	at4g25810	10.7	cell wall.modification
+	1.56916	0.0269675	-3.80341	I1M5G8	Malic enzyme	27	9	71.3	7.55	at1g79750	8.2.10	TCA / org. transformation.other organic acid transformaitons.malic
+	2.406	0.00392643	-3.8111	K7KP00	Uncharacterized protein	18	3	25.2	9.41	at5g02740	35.2	not assigned.unknown
+	4.94773	1.12789e-05	-3.84242	I1LWJ6	Uncharacterized protein	17	14	136	7.99	at3g28860	34.16	transport.ABC transporters and multidrug resistance systems
+	2.51332	0.00306676	-3.89713	A0A0R0IBM9	CMP/dCMP-type deaminase domain-containing protein	19	3	20.7	5.86	at5g28050	23.2	nucleotide metabolism.degradation
+	2.68261	0.00207679	-4.09311	Q70MR5	Ornithine decarboxylase (EC 4.1.1.17)	9	2	46.3	5.6	at5g11880	13.1.3.5.5	amino acid metabolism.synthesis.aspartate family.lysine.diaminopimelate decarboxylase
+	1.78873	0.0162658	-4.16304	I1JDD7	Cellulose synthase (EC 2.4.1.12)	11	7	121.4	7.18	at5g64740	10.2.1	cell wall.cellulose synthesis.cellulose synthase
+	1.90302	0.012502	-4.20094	I1MLF6	Uncharacterized protein	5	2	73.9	5.45	at3g27020	34.13	transport.peptides and oligopeptides
+	2.93363	0.00116512	-4.33763	I1NA96	Phenylalanine ammonia-lyase (EC 4.3.1.24)	28	11	77.7	6.49	at2g37040	16.2.1.1	secondary metabolism.phenylpropanoids.lignin biosynthesis.PAL
+	4.9602	1.09598e-05	-4.40306	I1KI92	PlsC domain-containing protein	9	3	55.5	9.23	at4g00400	11.3	lipid metabolism.Phospholipid synthesis
+	4.2584	5.51567e-05	-4.55129	I1N0I7	t-SNARE coiled-coil homology domain-containing protein	16	3	28.1	8.9	at1g16240	31.4	cell.vesicle transport
+	3.50596	0.00031192	-4.60203	I1LVD2	Cellulose synthase (EC 2.4.1.12)	13	7	120.5	7.08	at5g05170	10.2.1	cell wall.cellulose synthesis.cellulose synthase
+	2.47334	0.00336251	-4.70917	I1KPJ3	Endoglucanase (EC 3.2.1.4)	6	3	68.7	8.72	at1g64390	26.3.4	misc.gluco-, galacto- and mannosidases.endoglucanase
+	2.43964	0.0036338	-4.83181	I1LZ94	Phenylalanine ammonia-lyase (EC 4.3.1.24)	38	15	78.1	6.1	at2g37040	16.2.1.1	secondary metabolism.phenylpropanoids.lignin biosynthesis.PAL
+	1.49351	0.0320992	-5.06028	I1M8D6	X8 domain-containing protein	7	2	51.2	5.19	at4g34480	35.1	not assigned.no ontology
+	3.03311	0.000926595	-5.34583	A0A0R0I8A1	Xyloglucan endotransglucosylase/hydrolase (EC 2.4.1.207)	41	7	29.9	7.96	at4g25810	10.7	cell wall.modification
+	4.16543	6.83236e-05	-5.82346	A0A0R0FIC1	Flavodoxin-like domain-containing protein	4	2	71.6	6.92	at1g75200	35.1	not assigned.no ontology
+	3.83913	0.000144834	-5.86103	C6TKY7	Str_synth domain-containing protein	8	2	38.8	7.81	at3g57030	16.4.1	secondary metabolism.N misc.alkaloid-like
+	3.11976	0.000758992	-6.0312	I1LKW4	Uncharacterized protein	21	9	62.4	9.11	at5g22740	10.2	cell wall.cellulose synthesis
+	3.70939	0.000195257	-6.16445	A0A0R0GCM7	CMP/dCMP-type deaminase domain-containing protein	19	3	20.6	6.13	at5g28050	23.2	nucleotide metabolism.degradation
+	2.62658	0.00236278	-6.65781	I1K2B5	Uncharacterized protein	20	9	79.6	6.6	at5g67360	29.5.1	protein.degradation.subtilases
+	3.06844	0.000854196	-7.31909	I1LJF7	MFS domain-containing protein	8	3	56.5	9.38	at3g18830	34.2	transporter.sugars
+	4.50081	3.15639e-05	-10.4654	A0A0R0EIR6	Glycosyltransferase (EC 2.4.1.-)	36	9	54.4	5.92	at1g22360	26.2	misc.UDP glucosyl and glucoronyl transferases
